# Supplementary material
Source: Research Square preprint supplement (doi:10.21203/rs.3.rs-8133642/v1)
Supplement: Supplementary file 1 [file 2d97faca632588ea2bd46c9a.xlsx]

## Sheet: Working areas
Title: "New insights into formation of the dolomite – magnesite – siderite series in the Newania carbonatite complex, India: Mineralogy, petrology and in situ SIMS analyses (REE, d13C, d18O, U-Th-Pb ages)". Journal: Contributions to Mineralogy and Petrology.
Authors: Jens Hopp*, Shrinivas G. Viladkar, Axel K. Schmitt, Andreas T. Hertwig, Alexander Varychev. Corresponding author*: Institute of Earth Sciences, Heidelberg University, Im Neuenheimer Feld 234-236, D-69120 Heidelberg, Germany. Email: jens.hopp@geow.uni-heidelberg.de
Sample:			NE-3a												NE-3b													NE-4													NE-5
Profile 1 (across dolomite "vein"):												Profile 3 (monazite):													Area 1 (area analyses):													Area 3:
																									Area 2:
Element composition line profile (in at%):																																						Area 4:
												Element distribution profile 3 (monazite), wt%:					("peak" = hole)
																									Area 3:
																																						Area 5 (metamict zircon):
												Area 1:
																									Area 4:
												Area 2:
																																						Area 6:
																									Area 5:
												Area 3:
												Area 4:													Area 6:
												Area 5:
												Area 6:
												Area 7:
												Area 8:
												Area 9:
												Area analyses element map in monazite				(blue: Mzt, orange: Dol, green: Mgs, purple: Ap)
												Area 'monazite spot analyses':

## Sheet: Dolomite
Ne-3a											Ne-3a											Ne-3a	MODAL-COMPOSITIONS (%)
		Atom%											Weight%
Profile		O	Mg	Ca	Mn	Fe	Sr				Profile		O	Mg	Ca	Mn	Fe	Sr				Profile	(Ca,Sr)CO3	(Fe,Mn)CO3	MgCO3		Fe/(Fe+Mg)
Spektrum 9		72.3	11.05	13.45	0.17	3.01	0.02				Spektrum 9		53.95	12.53	25.15	0.42	7.85	0.1				Spektrum 9	48.6282	11.4801	39.8917		0.214083
Spektrum 10		72.34	10.98	13.46	0.18	3.02	0.03				Spektrum 10		53.97	12.45	25.15	0.45	7.86	0.13				Spektrum 10	48.7532	11.5649	39.682		0.215714
Spektrum 11		72.41	10.97	13.44	0.15	2.99	0.03				Spektrum 11		54.08	12.45	25.15	0.4	7.79	0.13				Spektrum 11	48.8397	11.3851	39.7752		0.214183
Spektrum 12		72.4	10.99	13.45	0.16	2.97	0.02				Spektrum 12		54.09	12.48	25.17	0.41	7.74	0.1				Spektrum 12	48.822	11.3447	39.8333		0.212751
Spektrum 13		72.29	11	13.48	0.18	3.02	0.03				Spektrum 13		53.91	12.46	25.19	0.47	7.86	0.1				Spektrum 13	48.755	11.5482	39.6969		0.215407
Spektrum 14		72.37	11.01	13.45	0.18	2.96	0.03				Spektrum 14		54.05	12.5	25.16	0.45	7.72	0.12				Spektrum 14	48.7875	11.3645	39.848		0.211883
Spektrum 15		71.99	11.19	13.6	0.17	3.01	0.03				Spektrum 15		53.58	12.66	25.36	0.44	7.81	0.14				Spektrum 15	48.6786	11.3571	39.9643		0.211972
Spektrum 16		71.98	11.2	13.59	0.18	3.02	0.03				Spektrum 16		53.57	12.67	25.35	0.47	7.84	0.11				Spektrum 16	48.6081	11.4204	39.9714		0.212377
Spektrum 17		72.03	11.16	13.6	0.17	3.01	0.03				Spektrum 17		53.63	12.63	25.36	0.44	7.81	0.14				Spektrum 17	48.7308	11.3693	39.8999		0.212421
Spektrum 20		72.25	11.11	13.44	0.17	2.99	0.02				Spektrum 20		53.92	12.6	25.14	0.44	7.8	0.09				Spektrum 20	48.5395	11.3956	40.0649		0.212057
Spektrum 21		72.24	11.18	13.38	0.17	2.98	0.05				Spektrum 21		53.91	12.67	25.02	0.45	7.76	0.2				Spektrum 21	48.379	11.3473	40.2738		0.210452
Spektrum 22		72.18	11.17	13.5	0.19	2.93	0.02				Spektrum 22		53.87	12.67	25.25	0.48	7.64	0.1				Spektrum 22	48.6156	11.219	40.1654		0.207801
Spektrum 23		71.94	11.2	13.64	0.19	2.99	0.03				Spektrum 23		53.53	12.66	25.43	0.47	7.77	0.14				Spektrum 23	48.7344	11.3369	39.9287		0.210712
Spektrum 24		71.84	11.22	13.69	0.19	3.02	0.04				Spektrum 24		53.38	12.67	25.48	0.48	7.82	0.16				Spektrum 24	48.7571	11.3991	39.8438		0.212079
Spektrum 25		71.86	11.2	13.7	0.17	3.05	0.02				Spektrum 25		53.4	12.65	25.51	0.44	7.9	0.1				Spektrum 25	48.7562	11.4428	39.801		0.214035
Spektrum 26		71.96	11.14	13.68	0.18	3.01	0.03				Spektrum 26		53.53	12.6	25.49	0.45	7.82	0.11				Spektrum 26	48.8944	11.3766	39.729		0.212721
Spektrum 27		71.95	11.19	13.62	0.18	3.03	0.03				Spektrum 27		53.52	12.65	25.38	0.45	7.88	0.12				Spektrum 27	48.6631	11.4439	39.893		0.21308
Spektrum 29		71.88	11.22	13.68	0.17	3.03	0.02				Spektrum 29		53.46	12.68	25.49	0.43	7.87	0.06				Spektrum 29	48.7198	11.3798	39.9004		0.212632
Spektrum 30		71.9	11.18	13.7	0.19	3.02	0.02				Spektrum 30		53.46	12.64	25.51	0.48	7.84	0.07				Spektrum 30	48.8083	11.4194	39.7723		0.212676
Spektrum 31		71.99	11.15	13.66	0.16	3.02	0.03				Spektrum 31		53.57	12.61	25.46	0.41	7.84	0.11				Spektrum 31	48.858	11.349	39.793		0.213126
Spektrum 32		71.94	11.21	13.65	0.18	3	0.02				Spektrum 32		53.53	12.67	25.44	0.46	7.79	0.1				Spektrum 32	48.717	11.3329	39.9501		0.211119
Spektrum 33		71.95	11.18	13.65	0.18	3.01	0.04				Spektrum 33		53.52	12.64	25.43	0.45	7.82	0.14				Spektrum 33	48.7883	11.3685	39.8432		0.212121
Spektrum 34		71.97	11.2	13.62	0.17	3.02	0.03				Spektrum 34		53.56	12.66	25.4	0.43	7.83	0.11				Spektrum 34	48.6805	11.3766	39.9429		0.212377
Spektrum 35		72.29	11.17	13.4	0.17	2.95	0.03				Spektrum 35		54.01	12.68	25.07	0.43	7.7	0.11				Spektrum 35	48.4488	11.2554	40.2958		0.208924
Spektrum 36		72.22	11.09	13.46	0.18	3.02	0.03				Spektrum 36		53.85	12.56	25.13	0.46	7.85	0.14				Spektrum 36	48.5601	11.5191	39.9208		0.214033
Spektrum 37		72.21	11.14	13.46	0.17	3	0.03				Spektrum 37		53.87	12.63	25.15	0.44	7.8	0.12				Spektrum 37	48.5252	11.4029	40.0719		0.212164
Spektrum 38		72.31	10.98	13.56	0.16	2.95	0.03				Spektrum 38		53.96	12.45	25.36	0.42	7.69	0.12				Spektrum 38	49.0968	11.2355	39.6676		0.211773
Spektrum 39		72.36	11.04	13.42	0.17	2.98	0.03				Spektrum 39		54.04	12.54	25.12	0.43	7.76	0.11				Spektrum 39	48.6614	11.3965	39.9421		0.212553
Spektrum 40		72.45	11.06	13.37	0.16	2.94	0.02				Spektrum 40		54.2	12.57	25.05	0.42	7.67	0.08				Spektrum 40	48.6025	11.2523	40.1452		0.21
Spektrum 41		72.51	10.98	13.36	0.19	2.93	0.03				Spektrum 41		54.23	12.47	25.04	0.48	7.64	0.14				Spektrum 41	48.7086	11.3496	39.9418		0.21064
Spektrum 42		72.49	11.03	13.33	0.17	2.95	0.03				Spektrum 42		54.22	12.54	24.99	0.43	7.7	0.12				Spektrum 42	48.5642	11.3413	40.0945		0.211016
Spektrum 43		72.47	10.99	13.42	0.17	2.94	0.01				Spektrum 43		54.2	12.49	25.14	0.43	7.68	0.06				Spektrum 43	48.7831	11.2968	39.9201		0.211055
Spektrum 44		72.54	10.98	13.33	0.17	2.95	0.03				Spektrum 44		54.27	12.49	24.99	0.44	7.7	0.11				Spektrum 44	48.6526	11.362	39.9854		0.211773
Spektrum 45		72.5	10.97	13.41	0.16	2.93	0.03				Spektrum 45		54.22	12.47	25.13	0.42	7.65	0.11				Spektrum 45	48.8727	11.2364	39.8909		0.210791
Spektrum 46		72.42	11.06	13.38	0.18	2.94	0.02				Spektrum 46		54.15	12.57	25.07	0.46	7.68	0.08				Spektrum 46	48.5859	11.3125	40.1015		0.21
Spektrum 47		72.39	11.08	13.49	0.17	2.84	0.02				Spektrum 47		54.16	12.6	25.28	0.44	7.43	0.1				Spektrum 47	48.9493	10.9058	40.1449		0.204023
Spektrum 48		72.5	11.08	13.34	0.16	2.9	0.03				Spektrum 48		54.28	12.6	25.02	0.41	7.58	0.11				Spektrum 48	48.6005	11.1232	40.2763		0.207439
Spektrum 49		72.47	10.99	13.41	0.17	2.93	0.03				Spektrum 49		54.2	12.49	25.12	0.45	7.64	0.11				Spektrum 49	48.8195	11.2604	39.9201		0.210489
Spektrum 50		72.41	11.08	13.38	0.18	2.94	0.02				Spektrum 50		54.15	12.59	25.06	0.45	7.67	0.07				Spektrum 50	48.5507	11.3043	40.1449		0.2097
Spektrum 51		72.31	11.13	13.34	0.18	3.01	0.02				Spektrum 51		54	12.63	24.96	0.46	7.84	0.1				Spektrum 51	48.2659	11.5246	40.2095		0.212871
Spektrum 52		72.41	11.09	13.37	0.17	2.92	0.03				Spektrum 52		54.15	12.61	25.05	0.45	7.63	0.12				Spektrum 52	48.5859	11.2038	40.2103		0.208423
Spektrum 53		72.41	11.05	13.38	0.17	2.97	0.02				Spektrum 53		54.13	12.55	25.05	0.43	7.74	0.1				Spektrum 53	48.5683	11.3809	40.0507		0.21184
Spektrum 54		71.88	11.32	13.69	0.16	2.91	0.03				Spektrum 54		53.53	12.81	25.55	0.42	7.56	0.13				Spektrum 54	48.8083	10.9214	40.2704		0.204498
Spektrum 55		72.08	11.18	13.62	0.18	2.92	0.02				Spektrum 55		53.75	12.67	25.43	0.46	7.61	0.08				Spektrum 55	48.8539	11.1032	40.043		0.207092
Spektrum 56		71.97	11.15	13.66	0.19	3	0.03				Spektrum 56		53.55	12.61	25.46	0.49	7.79	0.11				Spektrum 56	48.8405	11.3807	39.7788		0.212014
Spektrum 57		71.98	11.17	13.66	0.17	2.98	0.04				Spektrum 57		53.56	12.63	25.46	0.42	7.75	0.17				Spektrum 57	48.8936	11.242	39.8644		0.210601
Spektrum 58		72.05	11.13	13.59	0.19	3	0.03				Spektrum 58		53.64	12.59	25.35	0.49	7.8	0.13				Spektrum 58	48.7473	11.4173	39.8354		0.212314
Spektrum 59		71.99	11.14	13.67	0.17	2.99	0.04				Spektrum 59		53.56	12.6	25.49	0.44	7.75	0.16				Spektrum 59	48.9468	11.2817	39.7715		0.211607
Spektrum 60		72.09	11.18	13.54	0.18	2.99	0.03				Spektrum 60		53.72	12.66	25.27	0.46	7.78	0.11				Spektrum 60	48.6032	11.3539	40.043		0.211009
Spektrum 61		71.98	11.36	13.67	0.18	2.8	0.02				Spektrum 61		53.73	12.88	25.57	0.46	7.29	0.07				Spektrum 61	48.8405	10.6315	40.528		0.19774
Spektrum 62		71.99	11.41	13.63	0.17	2.78	0.03				Spektrum 62		53.77	12.95	25.49	0.43	7.24	0.12				Spektrum 62	48.7509	10.5282	40.7209		0.195913
Spektrum 63		71.96	11.38	13.64	0.18	2.81	0.03				Spektrum 63		53.71	12.9	25.51	0.46	7.32	0.11				Spektrum 63	48.7518	10.6633	40.5849		0.198027
Spektrum 64		72	11.32	13.67	0.17	2.81	0.03				Spektrum 64		53.73	12.83	25.56	0.44	7.31	0.13				Spektrum 64	48.9286	10.6429	40.4286		0.198868
Spektrum 65		72.03	11.31	13.64	0.17	2.81	0.04				Spektrum 65		53.76	12.83	25.51	0.45	7.31	0.14				Spektrum 65	48.9095	10.6543	40.4362		0.199008
Spektrum 66		71.96	11.41	13.63	0.17	2.8	0.03				Spektrum 66		53.72	12.94	25.49	0.45	7.29	0.12				Spektrum 66	48.7161	10.592	40.6919		0.197044
Spektrum 67		72.09	11.3	13.64	0.18	2.77	0.03				Spektrum 67		53.86	12.83	25.53	0.45	7.21	0.12				Spektrum 67	48.9613	10.5659	40.4728		0.196873
Spektrum 68		72.01	11.37	13.61	0.17	2.8	0.03				Spektrum 68		53.77	12.9	25.47	0.43	7.3	0.13				Spektrum 68	48.7491	10.6147	40.6362		0.197601
Spektrum 69		71.99	11.26	13.6	0.17	2.95	0.03				Spektrum 69		53.64	12.76	25.39	0.43	7.67	0.1				Spektrum 69	48.6612	11.1389	40.1999		0.2076
Spektrum 70		72	11.2	13.6	0.18	3.01	0.02				Spektrum 70		53.61	12.67	25.36	0.45	7.82	0.09				Spektrum 70	48.6255	11.3888	39.9857		0.211823
Spektrum 71		71.95	11.19	13.64	0.19	3.01	0.02				Spektrum 71		53.54	12.65	25.43	0.48	7.81	0.09				Spektrum 71	48.6988	11.4082	39.893		0.211972
Spektrum 72		71.96	11.15	13.66	0.17	3.02	0.04				Spektrum 72		53.52	12.6	25.44	0.44	7.84	0.16				Spektrum 72	48.8588	11.3766	39.7646		0.213126
Spektrum 73		71.92	11.21	13.62	0.19	3.05	0.01				Spektrum 73		53.49	12.67	25.37	0.48	7.93	0.05				Spektrum 73	48.5399	11.5385	39.9217		0.213885
Ne-3b		Atom%									Ne-3b		Weight%									Ne-3b
		O	Mg	Ca	Mn	Fe	Sr						O	Mg	Ca	Mn	Fe	Sr					(Ca,Sr)CO3	(Fe,Mn)CO3	MgCO3		Fe/(Fe+Mg)
Average		72.1534	11.1489	13.539	0.174355	2.95661	0.0277419				Average		53.8135	12.6356	25.2965	0.445968	7.695	0.113065				Average	48.7194	11.244	40.0366		0.209607
1sd		0.214694	0.115369	0.120385	0.00926683	0.0731976	0.00727775				1sd		0.265252	0.122272	0.18426	0.0209808	0.182825	0.0273914				1sd	0.148255	0.271891	0.2565
N		62	62	62	62	62	62				N		62	62	62	62	62	62				N	62	62	62
min		71.84	10.97	13.33	0.15	2.77	0.01				min		53.38	12.45	24.96	0.4	7.21	0.05				min	48.2659	10.5282	39.6676
max		72.54	11.41	13.7	0.19	3.05	0.05				max		54.28	12.95	25.57	0.49	7.93	0.2				max	49.0968	11.5649	40.7209
Ne-3b											Ne-3b											Ne-3b
		Atom%											Weight%
Area 1		O	Mg	Ca	Mn	Fe	Sr				Area 1		O	Mg	Ca	Mn	Fe	Sr				Area 1	(Ca,Sr)CO3	(Fe,Mn)CO3	MgCO3		Fe/(Fe+Mg)
Dolomit 1		72.27	11.13	13.31	0.18	3.08	0.03				Dolomit 1		53.91	12.62	24.87	0.47	8.01	0.12				Dolomit 1	48.1067	11.7562	40.137		0.216749
Dolomit 2		72.63	11.13	13.2	0.18	2.84	0.03				Dolomit 2		54.5	12.69	24.8	0.47	7.43	0.11				Dolomit 2	48.3199	11.0299	40.6501		0.203293
Area 3		O	Mg	Ca	Mn	Fe	Sr				Area 3		O	Mg	Ca	Mn	Fe	Sr				Area 3	(Ca,Sr)CO3	(Fe,Mn)CO3	MgCO3		Fe/(Fe+Mg)
Dolomit 1		72.45	11.17	13.22	0.19	2.95	0.02				Dolomit 1		54.23	12.7	24.8	0.48	7.72	0.07				Dolomit 1	48.0581	11.3975	40.5445		0.208924
Dolomit 2		72.46	11.02	13.23	0.17	3.1	0.02				Dolomit 2		54.12	12.51	24.75	0.44	8.08	0.09				Dolomit 2	48.1118	11.8736	40.0145		0.219547
Dolomit 3		72.58	11.08	13.16	0.17	2.98	0.03				Dolomit 3		54.35	12.61	24.7	0.44	7.79	0.11				Dolomit 3	48.1036	11.488	40.4085		0.211949
Dolomit 4		72.52	11.07	13.21	0.18	2.99	0.03				Dolomit 4		54.25	12.59	24.76	0.46	7.82	0.12				Dolomit 4	48.1805	11.5357	40.2838		0.21266
Dolomit 5		72.5	11.09	13.23	0.18	2.98	0.02				Dolomit 5		54.26	12.61	24.81	0.47	7.78	0.07				Dolomit 5	48.1818	11.4909	40.3273		0.211798
Area 4		O	Mg	Ca	Mn	Fe	Sr				Area 4		O	Mg	Ca	Mn	Fe	Sr				Area 4	(Ca,Sr)CO3	(Fe,Mn)CO3	MgCO3		Fe/(Fe+Mg)
Dolomit 1		72.73	11	13.1	0.17	2.98	0.03				Dolomit 1		54.53	12.53	24.61	0.43	7.8	0.11				Dolomit 1	48.1305	11.5469	40.3226		0.213162
Dolomit 2		72.5	11.18	13.18	0.19	2.93	0.03				Dolomit 2		54.3	12.72	24.73	0.48	7.65	0.12				Dolomit 2	48.0189	11.3413	40.6398		0.207654
Dolomit 3		72.56	11.15	13.17	0.17	2.92	0.04				Dolomit 3		54.36	12.69	24.72	0.44	7.63	0.16				Dolomit 3	48.1239	11.2568	40.6193		0.207534
Dolomit 4		72.61	11.2	13.09	0.18	2.9	0.03				Dolomit 4		54.47	12.77	24.6	0.46	7.6	0.11				Dolomit 4	47.8832	11.2409	40.8759		0.205674
Dolomit 5		72.72	11.04	13.1	0.19	2.91	0.03				Dolomit 5		54.55	12.59	24.62	0.49	7.63	0.13				Dolomit 5	48.1481	11.3678	40.484		0.208602
Dolomit 6		72.88	11.01	12.95	0.21	2.92	0.03				Dolomit 6		54.74	12.57	24.37	0.55	7.65	0.11				Dolomit 6	47.8614	11.5413	40.5973		0.20962
Area 5		O	Mg	Ca	Mn	Fe	Sr				Area 5		O	Mg	Ca	Mn	Fe	Sr				Area 5	(Ca,Sr)CO3	(Fe,Mn)CO3	MgCO3		Fe/(Fe+Mg)
Dolomit 1		72.47	11.19	13.08	0.18	3.04	0.04				Dolomit 1		54.22	12.73	24.51	0.46	7.95	0.14				Dolomit 1	47.6571	11.6963	40.6466		0.213633
Dolomit 2		72.53	11.2	13.09	0.17	2.98	0.03				Dolomit 2		54.33	12.75	24.56	0.43	7.79	0.13				Dolomit 2	47.7612	11.4671	40.7718		0.210155
Dolomit 3		72.69	10.9	13.14	0.18	3.05	0.04				Dolomit 3		54.39	12.39	24.63	0.47	7.96	0.16				Dolomit 3	48.2607	11.8272	39.9121		0.218638
Dolomit 4		72.3	11.11	13.29	0.17	3.09	0.03				Dolomit 4		53.94	12.6	24.84	0.44	8.05	0.13				Dolomit 4	48.104	11.7732	40.1228		0.217606
Dolomit 5		72.25	11.15	13.31	0.2	3.07	0.02				Dolomit 5		53.9	12.63	24.87	0.5	8.01	0.1				Dolomit 5	48.036	11.7838	40.1802		0.215893
Dolomit 6		72.44	11.25	13.1	0.2	3	0.02				Dolomit 6		54.23	12.79	24.56	0.52	7.83	0.06				Dolomit 6	47.588	11.6068	40.8052		0.210526
Area 6		O	Mg	Ca	Mn	Fe	Sr				Area 6		O	Mg	Ca	Mn	Fe	Sr				Area 6	(Ca,Sr)CO3	(Fe,Mn)CO3	MgCO3		Fe/(Fe+Mg)
Dolomit 1		72.7	11.24	13.07	0.17	2.8	0.02				Dolomit 1		54.67	12.85	24.62	0.43	7.35	0.07				Dolomit 1	47.9487	10.8791	41.1722		0.19943
Dolomit 2		72.12	11.41	13.43	0.18	2.83	0.03				Dolomit 2		53.92	12.97	25.16	0.45	7.38	0.12				Dolomit 2	48.2783	10.7963	40.9254		0.198736
Dolomit 3		72.16	11.31	13.43	0.19	2.89	0.01				Dolomit 3		53.92	12.84	25.15	0.48	7.54	0.06				Dolomit 3	48.2932	11.0672	40.6396		0.203521
Dolomit 4		72.51	11.18	13.27	0.19	2.86	0				Dolomit 4		54.37	12.74	24.93	0.49	7.47	0				Dolomit 4	48.2545	11.0909	40.6545		0.203704
Dolomit 5		72.59	11.2	13.16	0.17	2.87	0				Dolomit 5		54.49	12.77	24.75	0.44	7.52	0.02				Dolomit 5	48.0292	11.0949	40.8759		0.20398
Dolomit 6		72.74	11.18	13.04	0.16	2.86	0.02				Dolomit 6		54.69	12.78	24.55	0.41	7.5	0.08				Dolomit 6	47.909	11.0785	41.0125		0.203704
Dolomit 7		72.82	11.3	12.93	0.17	2.76	0.02				Dolomit 7		54.86	12.94	24.41	0.43	7.27	0.09				Dolomit 7	47.6453	10.78	41.5747		0.196302
Dolomit 8		73.03	11.07	12.91	0.18	2.81	0				Dolomit 8		55.06	12.68	24.38	0.46	7.4	0.01				Dolomit 8	47.868	11.0864	41.0456		0.20245
Dolomit 9		72.55	11.48	13.14	0.15	2.66	0.02				Dolomit 9		54.61	13.13	24.77	0.39	6.99	0.1				Dolomit 9	47.9417	10.2368	41.8215		0.188119
Dolomit 10		72.36	11.36	13.29	0.18	2.8	0.02				Dolomit 10		54.25	12.94	24.96	0.45	7.33	0.07				Dolomit 10	48.1374	10.7776	41.085		0.19774
Dolomit 11		72.58	11.34	13.13	0.16	2.79	0.01				Dolomit 11		54.56	12.95	24.72	0.41	7.32	0.04				Dolomit 11	47.9038	10.7546	41.3416		0.197452
Dolomit 12		72.74	11.3	13	0.17	2.79	0				Dolomit 12		54.78	12.93	24.53	0.43	7.33	0.01				Dolomit 12	47.6889	10.8584	41.4527		0.198013
Area 7		O	Mg	Ca	Mn	Fe	Sr				Area 7		O	Mg	Ca	Mn	Fe	Sr				Area 7	(Ca,Sr)CO3	(Fe,Mn)CO3	MgCO3		Fe/(Fe+Mg)
Dolomit 1		73.01	11.12	12.91	0.15	2.77	0.03				Dolomit 1		55.04	12.74	24.38	0.39	7.3	0.14				Dolomit 1	47.9615	10.8228	41.2157		0.199424
Dolomit 2		72.95	11.16	12.93	0.16	2.77	0.03				Dolomit 2		54.99	12.78	24.42	0.4	7.29	0.11				Dolomit 2	47.9113	10.8318	41.2569		0.198851
Dolomit 3		72.39	11.27	13.24	0.17	2.91	0.03				Dolomit 3		54.2	12.82	24.83	0.43	7.62	0.11				Dolomit 3	48.0449	11.1513	40.8038		0.205219
Dolomit 4		72.84	11.19	12.95	0.15	2.84	0.03				Dolomit 4		54.82	12.8	24.41	0.38	7.45	0.14				Dolomit 4	47.7909	11.0088	41.2003		0.202423
Dolomit 5		72.94	11.04	12.98	0.14	2.86	0.04				Dolomit 5		54.88	12.62	24.47	0.35	7.5	0.17				Dolomit 5	48.1153	11.0865	40.7982		0.205755
Dolomit 6		72.72	11.28	13.09	0.15	2.75	0.01				Dolomit 6		54.75	12.9	24.69	0.38	7.22	0.06				Dolomit 6	48.0205	10.6305	41.349		0.196009
Dolomit 7		72.33	11.3	13.28	0.16	2.91	0.02				Dolomit 7		54.14	12.85	24.9	0.41	7.61	0.08				Dolomit 7	48.0665	11.095	40.8385		0.204785
Dolomit 8		72.27	11.23	13.42	0.17	2.9	0.02				Dolomit 8		54.04	12.76	25.13	0.43	7.58	0.06				Dolomit 8	48.4499	11.0671	40.4831		0.205237
Dolomit 9		71.58	11.57	13.65	0.17	3.02	0.01				Dolomit 9		53.2	13.07	25.41	0.43	7.83	0.06				Dolomit 9	48.0647	11.2245	40.7108		0.206991
Dolomit 10		72.7	11.32	13.08	0.15	2.72	0.03				Dolomit 10		54.73	12.95	24.67	0.38	7.16	0.11				Dolomit 10	48.022	10.5128	41.4652		0.193732
Dolomit 11		72.66	11.11	13.13	0.17	2.89	0.03				Dolomit 11		54.51	12.67	24.67	0.45	7.56	0.14				Dolomit 11	48.1522	11.1965	40.6513		0.206429
Dolomit 12		72.59	11.23	13.17	0.17	2.81	0.04				Dolomit 12		54.48	12.81	24.76	0.44	7.37	0.15				Dolomit 12	48.1765	10.868	40.9555		0.200142
Dolomit 13		72.78	11.17	13.01	0.18	2.83	0.03				Dolomit 13		54.72	12.76	24.51	0.45	7.44	0.12				Dolomit 13	47.906	11.058	41.036		0.202143
Dolomit 14		72.64	11.15	13.07	0.17	2.95	0.03				Dolomit 14		54.47	12.71	24.55	0.43	7.73	0.11				Dolomit 14	47.8626	11.3993	40.738		0.20922
Dolomit 15		72.74	11.14	13.04	0.18	2.88	0.02				Dolomit 15		54.65	12.72	24.54	0.48	7.54	0.08				Dolomit 15	47.909	11.2252	40.8657		0.205421
Dolomit 16		72.31	11.27	13.32	0.19	2.89	0.03				Dolomit 16		54.08	12.81	24.96	0.48	7.55	0.12				Dolomit 16	48.1949	11.1191	40.6859		0.204096
Area 8		O	Mg	Ca	Mn	Fe	Sr				Area 8		O	Mg	Ca	Mn	Fe	Sr				Area 8	(Ca,Sr)CO3	(Fe,Mn)CO3	MgCO3		Fe/(Fe+Mg)
Dolomit 1		73.2	10.89	12.86	0.15	2.89	0.01				Dolomit 1		55.2	12.48	24.3	0.39	7.61	0.03				Dolomit 1	48.0224	11.3433	40.6343		0.209724
Dolomit 2		72.84	10.99	12.97	0.18	3.01	0.02				Dolomit 2		54.67	12.54	24.38	0.46	7.88	0.08				Dolomit 2	47.8101	11.7409	40.449		0.215
Dolomit 3		72.73	11.02	13.06	0.19	2.99	0.01				Dolomit 3		54.55	12.56	24.54	0.5	7.82	0.04				Dolomit 3	47.9281	11.6612	40.4107		0.213419
Dolomit 4		72.9	11.06	12.92	0.18	2.94	0				Dolomit 4		54.84	12.64	24.34	0.47	7.72	0				Dolomit 4	47.6753	11.5129	40.8118		0.21
Dolomit 5		72.69	10.9	13.19	0.19	3.03	0.01				Dolomit 5		54.41	12.39	24.73	0.49	7.91	0.06				Dolomit 5	48.3163	11.7862	39.8975		0.217516
Dolomit 6		72.35	11.04	13.31	0.18	3.1	0.03				Dolomit 6		53.97	12.51	24.87	0.47	8.07	0.11				Dolomit 6	48.2285	11.8583	39.9132		0.219236
Dolomit 7		72.64	10.97	13.17	0.16	3.04	0.02				Dolomit 7		54.38	12.48	24.71	0.42	7.94	0.08				Dolomit 7	48.2091	11.6959	40.095		0.216988
Dolomit 8		72.74	10.98	13.01	0.16	3.1	0.02				Dolomit 8		54.49	12.5	24.41	0.42	8.1	0.07				Dolomit 8	47.7814	11.9545	40.264		0.22017
Dolomit 9		72.31	11.12	13.2	0.18	3.18	0.01				Dolomit 9		53.94	12.6	24.68	0.45	8.28	0.04				Dolomit 9	47.7068	12.1343	40.1589		0.222378
Area 9		O	Mg	Ca	Mn	Fe	Sr				Area 9		O	Mg	Ca	Mn	Fe	Sr				Area 9	(Ca,Sr)CO3	(Fe,Mn)CO3	MgCO3		Fe/(Fe+Mg)
Dolomit 1		72.59	11.02	13.1	0.18	3.09	0.03				Dolomit 1		54.25	12.52	24.59	0.45	8.07	0.11	0.11			Dolomit 1	47.8848	11.9256	40.1896		0.218994
Dolomit 2		72.77	10.96	13	0.18	3.06	0.03				Dolomit 2		54.47	12.49	24.44	0.46	8.02	0.13	0.13			Dolomit 2	47.8516	11.8986	40.2497		0.21826
Dolomit 3		72.72	10.97	13.06	0.17	3.05	0.02				Dolomit 3		54.43	12.49	24.54	0.45	8	0.1	0.1			Dolomit 3	47.9648	11.8078	40.2274		0.217546
Ne-3b		Atom%									Ne-3b		Weight%									Ne-3b
		O	Mg	Ca	Mn	Fe	Sr						O	Mg	Ca	Mn	Fe	Sr					(Ca,Sr)CO3	(Fe,Mn)CO3	MgCO3		Fe/(Fe+Mg)
Average		72.3672	11.1499	13.343	0.174132	2.94149	0.0252893				Average		54.1116	12.6693	24.9938	0.44595	7.67636	0.10281				Average	48.3732	11.2749	40.3518		0.208743
1sd		0.323197	0.12804	0.242738	0.01176	0.0961203	0.00945405				1sd		0.435583	0.148055	0.371424	0.029781	0.2352	0.0362321				1sd	0.393574	0.348653	0.482402
N		121	121	121	121	121	121				N		121	121	121	121	121	121				N	121	121	121
min		71.58	10.89	12.86	0.14	2.66	0				min		53.2	12.39	24.3	0.35	6.99	0				min	47.588	10.2368	39.6676
max		73.2	11.57	13.7	0.21	3.18	0.05				max		55.2	13.13	25.57	0.55	8.28	0.2				max	49.0968	12.1343	41.8215
Ne-4											Ne-4											Ne-4
		Atom%											Weight%
Area-analyses (1)		O	Mg	Ca	Mn	Fe	Sr				Area-analyses		O	Mg	Ca	Mn	Fe	Sr				Area-analyses	(Ca,Sr)CO3	(Fe,Mn)CO3	MgCO3		Fe/(Fe+Mg)
Dolomite 1		72.21	11.05	13.51	0.18	3.02	0.03				Dolomite 1		53.82	12.52	25.22	0.46	7.85	0.13				Dolomite 1	48.7226	11.5149	39.7625		0.214641
Dolomite 2		72.26	11.1	13.48	0.16	2.99	0.02				Dolomite 2		53.94	12.59	25.2	0.4	7.8	0.08				Dolomite 2	48.6486	11.3514	40		0.212207
Dolomite 3		72.21	11.12	13.42	0.17	3.05	0.03				Dolomite 3		53.84	12.59	25.07	0.44	7.94	0.11				Dolomite 3	48.3987	11.5869	40.0144		0.215243
Dolomite 4		72.39	11.08	13.33	0.18	3	0.02				Dolomite 4		54.09	12.58	24.95	0.46	7.82	0.1				Dolomite 4	48.352	11.5176	40.1304		0.213068
Area 3		O	Mg	Ca	Mn	Fe	Sr				Area 3		O	Mg	Ca	Mn	Fe	Sr				Area 3	(Ca,Sr)CO3	(Fe,Mn)CO3	MgCO3		Fe/(Fe+Mg)
Dolomit 1		72.59	11.04	13.15	0.18	3.01	0.02				Dolomit 1		54.34	12.55	24.67	0.47	7.88	0.1				Dolomit 1	48.0657	11.6423	40.292		0.214235
Dolomit 2		72.56	11.06	13.21	0.18	2.96	0.02				Dolomit 2		54.34	12.59	24.79	0.45	7.73	0.1				Dolomit 2	48.2319	11.4473	40.3208		0.211127
Dolomit 3		72.45	11.28	13.27	0.16	2.82	0.01				Dolomit 3		54.35	12.86	24.93	0.42	7.39	0.05				Dolomit 3	48.2208	10.8206	40.9586		0.2
Dolomit 4		72.46	11.08	13.22	0.18	3.04	0.03				Dolomit 4		54.17	12.59	24.76	0.46	7.92	0.1				Dolomit 4	48.0944	11.6878	40.2178		0.215297
Area 4		O	Mg	Ca	Mn	Fe	Sr				Area 4		O	Mg	Ca	Mn	Fe	Sr				Area 4	(Ca,Sr)CO3	(Fe,Mn)CO3	MgCO3		Fe/(Fe+Mg)
Dolomit 1		72.36	11.11	13.26	0.17	3.08	0.03				Dolomit 1		54.03	12.61	24.8	0.42	8.04	0.1				Dolomit 1	48.0651	11.7541	40.1808		0.217054
Dolomit 2		72.47	11.09	13.16	0.15	3.13	0.01				Dolomit 2		54.17	12.59	24.64	0.39	8.16	0.04				Dolomit 2	47.8214	11.9099	40.2687		0.220113
Area 5		O	Mg	Ca	Mn	Fe	Sr				Area 5		O	Mg	Ca	Mn	Fe	Sr				Area 5	(Ca,Sr)CO3	(Fe,Mn)CO3	MgCO3		Fe/(Fe+Mg)
Dolomit 1		72.53	11.11	13.21	0.17	2.97	0.01				Dolomit 1		51.65	12.02	23.57	0.41	7.38	0.05				Dolomit 1	48.1252	11.4307	40.4441		0.210938
Dolomit 2		72.55	12.1	13.2	0.12	2.04	0				Dolomit 2		52.06	13.19	23.73	0.29	5.1	-0.01				Dolomit 2	48.0699	7.86599	44.0641		0.144272
Ne-4		Atom%									Ne-4		Weight%									Ne-4
		O	Mg	Ca	Mn	Fe	Sr						O	Mg	Ca	Mn	Fe	Sr					(Ca,Sr)CO3	(Fe,Mn)CO3	MgCO3		Fe/(Fe+Mg)
Average		72.42	11.185	13.285	0.166667	2.92583	0.0191667				Average		53.7333	12.6067	24.6942	0.4225	7.58417	0.0791667				Average	48.2347	11.2108	40.5545		0.207347
1sd		0.129357	0.28209	0.117721	0.0169967	0.27666	0.00953794				1sd		0.86192	0.251904	0.501356	0.0472802	0.780539	0.0375185				1sd	0.247865	1.04043	1.09382
N		12	12	12	12	12	12				N		12	12	12	12	12	12				N	12	12	12
min		72.21	11.04	13.15	0.12	2.04	0				min		51.65	12.02	23.57	0.29	5.1	-0.01				min	47.8214	7.86599	39.7625
max		72.59	12.1	13.51	0.18	3.13	0.03				max		54.35	13.19	25.22	0.47	8.16	0.13				max	48.7226	11.9099	44.0641
Ne-5											Ne-5											Ne-5
		Atom%											Weight%
Area 4		O	Mg	Ca	Mn	Fe	Sr				Area 4		O	Mg	Ca	Mn	Fe	Sr				Area 4	(Ca,Sr)CO3	(Fe,Mn)CO3	MgCO3		Fe/(Fe+Mg)
Spektrum 32		72.75	11.18	13.13	0.2	2.73	0.01				Spektrum 32		54.73	12.78	24.74	0.52	7.18	0.04				Spektrum 32	48.2202	10.7523	41.0275		0.196262
Spektrum 33		72.77	11.14	13.09	0.22	2.78	0.01				Spektrum 33		54.72	12.73	24.66	0.56	7.28	0.05				Spektrum 33	48.091	11.0132	40.8957		0.199713
Spektrum 34		72.64	11.15	13.17	0.22	2.81	0.01				Spektrum 34		54.54	12.72	24.77	0.56	7.36	0.05				Spektrum 34	48.1725	11.0746	40.7529		0.201289
Spektrum 35		72.64	10.7	13.19	0.15	3.28	0.05				Spektrum 35		54.15	12.12	24.63	0.38	8.52	0.19				Spektrum 35	48.3741	12.532	39.0939		0.234621
Spektrum 49		72.11	10.93	13.45	0.2	3.3	0				Spektrum 49		53.56	12.34	25.03	0.51	8.56	0				Spektrum 49	48.2425	12.5538	39.2037		0.231904
Spektrum 50		72.5	10.48	13.35	0.19	3.48	0				Spektrum 50		53.83	11.82	24.82	0.49	9.03	0				Spektrum 50	48.5455	13.3455	38.1091		0.249284
Spektrum 51		72.64	10.25	13.35	0.21	3.52	0.01				Spektrum 51		53.9	11.56	24.82	0.54	9.13	0.06				Spektrum 51	48.8661	13.643	37.4909		0.255628
Spektrum 52		72.58	10.23	13.39	0.23	3.57	0				Spektrum 52		53.8	11.52	24.87	0.58	9.23	0				Spektrum 52	48.833	13.8585	37.3085		0.258696
Spektrum 53		72.39	10.33	13.56	0.23	3.48	0.01				Spektrum 53		53.6	11.62	25.16	0.6	8.99	0.02				Spektrum 53	49.1489	13.4372	37.414		0.251991
Spektrum 55		72.7	10.51	13.31	0.21	3.27	0				Spektrum 55		54.18	11.9	24.85	0.54	8.52	0.02				Spektrum 55	48.7546	12.7473	38.4982		0.2373
Spektrum 56		72.58	11.14	13.21	0.23	2.82	0.02				Spektrum 56		54.42	12.69	24.82	0.59	7.38	0.1				Spektrum 56	48.2495	11.1233	40.6273		0.202006
Spektrum 57		72.67	11.22	13.24	0.2	2.65	0.02				Spektrum 57		54.67	12.83	24.94	0.53	6.96	0.07				Spektrum 57	48.5181	10.4281	41.0538		0.19106
Spektrum 58		72.73	11.05	13.2	0.22	2.78	0.02				Spektrum 58		54.62	12.61	24.84	0.56	7.29	0.08				Spektrum 58	48.4782	11.0011	40.5207		0.201012
Area 6		O	Mg	Ca	Mn	Fe	Sr						O	Mg	Ca	Mn	Fe	Sr					(Ca,Sr)CO3	(Fe,Mn)CO3	MgCO3		Fe/(Fe+Mg)
Spektrum 66		72.96	10.85	13.05	0.21	2.92	0.01				Spektrum 66		54.8	12.39	24.56	0.55	7.66	0.04				Spektrum 66	48.2988	11.5754	40.1257		0.212055
Spektrum 67		72.39	11.1	13.32	0.2	2.98	0				Spektrum 67		54.12	12.62	24.96	0.51	7.78	0.02				Spektrum 67	48.2609	11.5217	40.2174		0.211648
Spektrum 68		72.7	11.07	13.11	0.21	2.88	0.02				Spektrum 68		54.55	12.63	24.64	0.55	7.55	0.09				Spektrum 68	48.1129	11.3228	40.5643		0.206452
Spektrum 69		72.62	11.14	13.2	0.22	2.79	0.02				Spektrum 69		54.49	12.7	24.82	0.56	7.32	0.1				Spektrum 69	48.3011	10.9974	40.7015		0.200287
Ne-5		Atom%									Ne-5		Weight%									Ne-5
		O	Mg	Ca	Mn	Fe	Sr						O	Mg	Ca	Mn	Fe	Sr					(Ca,Sr)CO3	(Fe,Mn)CO3	MgCO3		Fe/(Fe+Mg)
Average		72.61	10.8512	13.2541	0.208824	3.06118	0.0123529				Average		54.2753	12.3282	24.8194	0.537059	7.98471	0.0547059				Average	48.4393	11.9369	39.6238		0.220033
1sd		0.18237	0.346	0.132889	0.0187499	0.312464	0.012141				1sd		0.402099	0.455647	0.147148	0.0483571	0.770051	0.0470441				1sd	0.292632	1.10098	1.33244
N		17	17	17	17	17	17				N		17	17	17	17	17	17				N	17	17	17
min		72.11	10.23	13.05	0.15	2.65	0				min		53.56	11.52	24.56	0.38	6.96	0				min	48.091	10.4281	37.3085
max		72.96	11.22	13.56	0.23	3.57	0.05				max		54.8	12.83	25.16	0.6	9.23	0.19				max	49.1489	13.8585	41.0538
Ne-5a-1:	(coated with gold)										Ne-5a-1:											Ne-5a-1:
	Atom%											Weight%
Area 2:	C	O	Mg	Ca	Mn	Fe	Sr				Area 2:	C	O	Mg	Ca	Mn	Fe	Sr				Area 2	(Ca,Sr)CO3	(Fe,Mn)CO3	MgCO3		Fe/(Fe+Mg)
Spektrum 7	24.55	57.03	7.36	8.98	0.12	1.95	0				Spektrum 7	15.84	49.01	9.61	19.34	0.35	5.86	0				Spektrum 7	48.7778	11.2439	39.9783		0.209452
Spektrum 8	24.46	57.04	7.41	9.07	0.11	1.87	0.03				Spektrum 8	15.77	48.98	9.67	19.52	0.33	5.59	0.14				Spektrum 8	49.2158	10.7085	40.0757		0.201509
Spektrum 14	25.06	56.61	7.3	8.94	0.12	1.97	0				Spektrum 14	16.19	48.71	9.54	19.27	0.35	5.91	0.02				Spektrum 14	48.7725	11.4021	39.8254		0.212513
Area 3:	C	O	Mg	Ca	Mn	Fe	Sr				Area 3:	C	O	Mg	Ca	Mn	Fe	Sr				Area 3	(Ca,Sr)CO3	(Fe,Mn)CO3	MgCO3		Fe/(Fe+Mg)
Spektrum 19	24.67	56.71	8.03	9.11	0.07	1.4	0.02				Spektrum 19	16.04	49.11	10.56	19.76	0.2	4.22	0.1				Spektrum 19	49.007	7.8905	43.1025		0.148462
Spektrum 22	25.17	56.22	7.42	9.05	0.13	1.99	0.01				Spektrum 22	16.22	48.24	9.67	19.45	0.39	5.97	0.05				Spektrum 22	48.7097	11.3978	39.8925		0.211477
Spektrum 23	24.77	57.04	7.22	8.91	0.12	1.94	0.01				Spektrum 23	16.01	49.11	9.44	19.21	0.36	5.82	0.05				Spektrum 23	49.011	11.3187	39.6703		0.21179
Spektrum 26	24.73	56.72	8.16	8.93	0.09	1.35	0.03				Spektrum 26	16.11	49.22	10.76	19.42	0.28	4.08	0.14				Spektrum 26	48.2759	7.75862	43.9655		0.141956
Spektrum 27	24.92	56.76	7.29	8.99	0.1	1.94	0				Spektrum 27	16.1	48.85	9.53	19.38	0.31	5.84	0				Spektrum 27	49.0721	11.1354	39.7926		0.210184
Spektrum 28	24.41	57.15	7.31	9.02	0.11	1.99	0				Spektrum 28	15.73	49.04	9.53	19.39	0.33	5.96	0.01				Spektrum 28	48.9419	11.3945	39.6636		0.213978
Spektrum 29	24.81	56.69	7.42	9.03	0.11	1.93	0				Spektrum 29	16.01	48.71	9.7	19.43	0.33	5.8	0.02				Spektrum 29	48.8372	11.033	40.1298		0.206417
Spektrum 33	25.31	56.18	7.35	9.03	0.13	2	0.01				Spektrum 33	16.32	48.25	9.59	19.43	0.38	5.98	0.05				Spektrum 33	48.8121	11.5011	39.6868		0.213904
Spektrum 35	24.99	56.81	7.17	8.97	0.11	1.95	0				Spektrum 35	16.16	48.92	9.39	19.35	0.33	5.86	0				Spektrum 35	49.2857	11.3187	39.3956		0.213816
Spektrum 36	25.13	56.48	7.39	8.95	0.13	1.91	0.01				Spektrum 36	16.24	48.61	9.66	19.3	0.39	5.74	0.07				Spektrum 36	48.7221	11.093	40.1849		0.205376
Spektrum 37	24.48	57.05	7.35	8.97	0.12	2	0.01				Spektrum 37	15.77	48.95	9.58	19.28	0.36	6	0.05				Spektrum 37	48.6721	11.4905	39.8374		0.213904
Spektrum 38	24.73	56.9	7.28	8.95	0.15	1.99	0				Spektrum 38	15.95	48.88	9.5	19.27	0.43	5.97	0.01				Spektrum 38	48.7207	11.6494	39.6298		0.214671
Spektrum 40	24.38	57.12	7.43	8.97	0.13	1.96	0.01				Spektrum 40	15.71	49.02	9.69	19.29	0.39	5.87	0.04				Spektrum 40	48.5405	11.2973	40.1622		0.208733
Spektrum 42	24.03	57.47	7.41	9	0.13	1.96	0				Spektrum 42	15.47	49.29	9.66	19.34	0.38	5.87	0				Spektrum 42	48.6486	11.2973	40.0541		0.209178
Spektrum 43	24.92	56.62	7.36	9	0.13	1.96	0				Spektrum 43	16.07	48.65	9.61	19.36	0.4	5.88	0.02				Spektrum 43	48.7805	11.3279	39.8916		0.2103
Spektrum 45	24.39	57.08	7.38	9.04	0.11	2	0				Spektrum 45	15.7	48.95	9.61	19.43	0.33	5.98	0				Spektrum 45	48.7858	11.3869	39.8273		0.21322
Spektrum 46	25.04	56.43	7.36	9.06	0.12	1.99	0				Spektrum 46	16.14	48.45	9.6	19.5	0.34	5.98	0				Spektrum 46	48.8937	11.3869	39.7194		0.212834
Area 4	C	O	Mg	Ca	Mn	Fe	Sr				Area 4	C	O	Mg	Ca	Mn	Fe	Sr				Area 4	(Ca,Sr)CO3	(Fe,Mn)CO3	MgCO3		Fe/(Fe+Mg)
Spektrum 50	25.02	56.66	7.37	8.93	0.14	1.87	0.01				Spektrum 50	16.19	48.82	9.65	19.27	0.42	5.63	0.03				Spektrum 50	48.7991	10.9716	40.2293		0.202381
Spektrum 51	25.09	56.65	7.22	8.93	0.13	1.97	0.02				Spektrum 51	16.2	48.74	9.44	19.25	0.39	5.91	0.08				Spektrum 51	48.9874	11.4943	39.5183		0.214363
Spektrum 52	24.36	57.26	7.41	8.95	0.13	1.89	0				Spektrum 52	15.73	49.25	9.68	19.28	0.37	5.68	0.01				Spektrum 52	48.6942	10.9902	40.3156		0.203226
Spektrum 53	24.2	57.24	7.46	9.07	0.12	1.91	0				Spektrum 53	15.59	49.11	9.72	19.49	0.36	5.73	0				Spektrum 53	48.8685	10.9375	40.194		0.203842
Spektrum 55	24.65	56.67	7.49	9.17	0.14	1.88	0				Spektrum 55	15.88	48.61	9.77	19.7	0.42	5.62	0				Spektrum 55	49.0899	10.8137	40.0964		0.20064
Spektrum 56	24.47	56.97	7.44	9.04	0.16	1.91	0				Spektrum 56	15.77	48.89	9.71	19.44	0.48	5.72	0				Spektrum 56	48.7332	11.159	40.1078		0.204278
Spektrum 57	24.69	56.63	7.51	9.11	0.14	1.92	0				Spektrum 57	15.9	48.58	9.79	19.59	0.4	5.74	0				Spektrum 57	48.7687	11.0278	40.2034		0.203606
Spektrum 58	24.66	56.77	6.67	9.16	0.07	2.64	0.03				Spektrum 58	15.7	48.12	8.59	19.45	0.21	7.8	0.12				Spektrum 58	49.4884	14.5934	35.9181		0.283566
Spektrum 61	24.63	56.8	7.49	9.04	0.12	1.92	0				Spektrum 61	15.88	48.78	9.77	19.45	0.36	5.76	0				Spektrum 61	48.6807	10.9855	40.3339		0.204038
Spektrum 64	23.81	57.46	7.5	9.13	0.12	1.97	0.01				Spektrum 64	15.29	49.13	9.74	19.57	0.35	5.87	0.05				Spektrum 64	48.7987	11.1586	40.0427		0.208025
Spektrum 68	24.18	56.98	7.55	9.2	0.14	1.95	0.01				Spektrum 68	15.52	48.71	9.8	19.7	0.4	5.83	0.04				Spektrum 68	48.8594	11.0875	40.0531		0.205263
Spektrum 69	24.49	57.08	7.45	8.98	0.12	1.87	0.01				Spektrum 69	15.82	49.1	9.75	19.34	0.36	5.6	0.03				Spektrum 69	48.7792	10.7976	40.4232		0.200644
Spektrum 71	24.77	56.68	7.29	9.09	0.14	2.02	0				Spektrum 71	15.93	48.57	9.49	19.52	0.4	6.06	0.02				Spektrum 71	49.0291	11.6505	39.3204		0.216971
Spektrum 72	24.53	56.97	7.43	9.06	0.12	1.88	0				Spektrum 72	15.82	48.95	9.71	19.5	0.37	5.65	0				Spektrum 72	48.9995	10.8167	40.1839		0.201933
Spektrum 74	24.55	57.08	7.36	8.96	0.13	1.91	0.01				Spektrum 74	15.84	49.08	9.62	19.3	0.4	5.73	0.03				Spektrum 74	48.8296	11.1051	40.0653		0.206041
Spektrum 76	24.02	57.37	7.36	9.12	0.14	1.96	0.02				Spektrum 76	15.43	49.08	9.57	19.56	0.42	5.85	0.1				Spektrum 76	49.1398	11.2903	39.5699		0.2103
Spektrum 79	24.22	57.11	7.52	9.13	0.13	1.89	0				Spektrum 79	15.59	48.96	9.8	19.6	0.38	5.67	0				Spektrum 79	48.902	10.8195	40.2785		0.20085
Spektrum 80	24.67	56.88	7.35	9.05	0.13	1.92	0				Spektrum 80	15.92	48.88	9.59	19.48	0.38	5.76	0				Spektrum 80	49.0515	11.1111	39.8374		0.20712
Spektrum 81	23.86	57.54	7.45	9.12	0.11	1.9	0.01				Spektrum 81	15.35	49.3	9.69	19.58	0.33	5.7	0.05				Spektrum 81	49.1124	10.8123	40.0753		0.203209
Spektrum 82	24.34	57.06	7.44	9.09	0.13	1.95	0				Spektrum 82	15.67	48.92	9.69	19.52	0.38	5.83	0				Spektrum 82	48.8447	11.1768	39.9785		0.207668
Spektrum 88	24.91	56.77	7.36	8.93	0.12	1.91	0				Spektrum 88	16.11	48.9	9.64	19.27	0.35	5.73	0				Spektrum 88	48.7445	11.0808	40.1747		0.206041
Spektrum 92	24.44	56.99	7.47	9.11	0.13	1.85	0				Spektrum 92	15.75	48.94	9.75	19.61	0.37	5.55	0.02				Spektrum 92	49.0841	10.6681	40.2478		0.198498
Area 5	C	O	Mg	Ca	Mn	Fe	Sr				Area 5	C	O	Mg	Ca	Mn	Fe	Sr				Area 5	(Ca,Sr)CO3	(Fe,Mn)CO3	MgCO3		Fe/(Fe+Mg)
Spektrum 93	24.33	57.01	7.57	9.13	0.12	1.86	0				Spektrum 93	15.67	48.93	9.87	19.62	0.35	5.56	0				Spektrum 93	48.8758	10.5996	40.5246		0.197243
Spektrum 94	23.91	57.46	7.49	9.09	0.14	1.91	0				Spektrum 94	15.38	49.23	9.75	19.51	0.42	5.71	0				Spektrum 94	48.7923	11.0038	40.204		0.203191
Spektrum 97	24.03	57.17	7.57	9.16	0.11	1.93	0.02				Spektrum 97	15.44	48.91	9.85	19.64	0.33	5.76	0.08				Spektrum 97	48.8558	10.8568	40.2874		0.203158
Spektrum 98	24	57.42	7.5	9.02	0.14	1.92	0.02				Spektrum 98	15.44	49.21	9.76	19.36	0.42	5.73	0.08				Spektrum 98	48.6022	11.0753	40.3226		0.203822
Spektrum 99	23.59	57.8	7.46	9.11	0.12	1.89	0.03				Spektrum 99	15.16	49.46	9.7	19.52	0.35	5.66	0.15				Spektrum 99	49.1134	10.8006	40.086		0.202139
Spektrum 100	24.16	57.16	7.53	9.18	0.1	1.86	0.01				Spektrum 100	15.55	49.01	9.81	19.72	0.3	5.57	0.05				Spektrum 100	49.197	10.4925	40.3105		0.198083
Spektrum 102	24.39	56.8	7.47	9.21	0.14	1.97	0.02				Spektrum 102	15.65	48.55	9.7	19.73	0.4	5.86	0.11				Spektrum 102	49.0696	11.2174	39.7129		0.208686
Spektrum 106	23.99	57.05	7.67	9.28	0.14	1.87	0				Spektrum 106	15.4	48.77	9.97	19.87	0.41	5.58	0				Spektrum 106	48.9451	10.6013	40.4536		0.196017
Spektrum 109	24.1	57.27	7.47	9.14	0.13	1.89	0				Spektrum 109	15.51	49.09	9.73	19.62	0.39	5.65	0.01				Spektrum 109	49.0607	10.8427	40.0966		0.201923
Spektrum 110	23.55	57.91	7.38	9.18	0.13	1.85	0.01				Spektrum 110	15.15	49.62	9.6	19.7	0.4	5.52	0.03				Spektrum 110	49.5418	10.6739	39.7844		0.200433
Spektrum 111	23.79	57.68	7.37	9.1	0.13	1.92	0.02				Spektrum 111	15.29	49.39	9.59	19.51	0.4	5.75	0.07				Spektrum 111	49.1909	11.0572	39.7519		0.206674
Spektrum 112	23.81	57.69	7.38	9.09	0.14	1.89	0.01				Spektrum 112	15.32	49.45	9.61	19.51	0.4	5.65	0.06				Spektrum 112	49.1626	10.967	39.8703		0.203883
Spektrum 113	24.09	57.27	7.44	9.13	0.14	1.93	0.01				Spektrum 113	15.48	49.04	9.68	19.58	0.41	5.76	0.05				Spektrum 113	49.008	11.0992	39.8928		0.205977
Spektrum 114	24.06	57.4	7.52	9.05	0.13	1.83	0				Spektrum 114	15.51	49.31	9.82	19.48	0.38	5.5	0				Spektrum 114	48.8397	10.5774	40.5828		0.195722
Spektrum 115	23.81	57.73	7.47	9.1	0.11	1.78	0				Spektrum 115	15.36	49.62	9.76	19.6	0.33	5.33	0				Spektrum 115	49.2958	10.2384	40.4659		0.192432
Spektrum 116	23.77	57.64	7.51	9.14	0.13	1.8	0.02				Spektrum 116	15.31	49.44	9.79	19.64	0.37	5.38	0.07				Spektrum 116	49.2473	10.3763	40.3763		0.19334
Spektrum 117	24.11	57.35	7.43	9.09	0.13	1.88	0				Spektrum 117	15.53	49.21	9.69	19.53	0.38	5.64	0.01				Spektrum 117	49.0556	10.8473	40.0971		0.201933
Spektrum 118	24.13	57.45	7.43	9.04	0.13	1.81	0				Spektrum 118	15.58	49.4	9.7	19.48	0.4	5.44	0				Spektrum 118	49.1037	10.5378	40.3585		0.195887
Spektrum 119	24.34	57.13	7.4	9.09	0.14	1.9	0				Spektrum 119	15.68	49.02	9.64	19.55	0.41	5.69	0.02				Spektrum 119	49.0556	11.0092	39.9352		0.204301
Spektrum 120	24.34	57.26	7.34	9.04	0.12	1.87	0.02				Spektrum 120	15.7	49.19	9.59	19.46	0.35	5.61	0.1				Spektrum 120	49.2659	10.8211	39.913		0.20304
Spektrum 121	24.17	57.34	7.33	9.16	0.15	1.86	0				Spektrum 121	15.57	49.2	9.55	19.69	0.43	5.56	0				Spektrum 121	49.5135	10.8649	39.6216		0.202394
Spektrum 122	24.59	56.76	7.44	9.15	0.14	1.93	0				Spektrum 122	15.82	48.66	9.69	19.64	0.42	5.77	0				Spektrum 122	49.0354	11.0932	39.8714		0.205977
Spektrum 123	24.09	57.38	7.41	9.11	0.13	1.87	0.01				Spektrum 123	15.51	49.22	9.66	19.58	0.39	5.61	0.03				Spektrum 123	49.2175	10.7933	39.9892		0.201509
Spektrum 124	24.3	57.11	7.44	9.14	0.13	1.88	0				Spektrum 124	15.65	49	9.69	19.65	0.38	5.63	0				Spektrum 124	49.1662	10.8123	40.0215		0.201717
Spektrum 125	24.12	57.23	7.41	9.15	0.15	1.94	0				Spektrum 125	15.5	49	9.64	19.62	0.43	5.8	0				Spektrum 125	49.0617	11.2064	39.7319		0.207487
Spektrum 126	24.36	56.98	7.48	9.17	0.12	1.89	0				Spektrum 126	15.69	48.87	9.74	19.7	0.35	5.65	0				Spektrum 126	49.1426	10.7717	40.0857		0.201708
Spektrum 127	24.22	57.28	7.39	9.1	0.12	1.87	0.01				Spektrum 127	15.6	49.16	9.64	19.57	0.36	5.61	0.06				Spektrum 127	49.2699	10.7626	39.9676		0.201944
Spektrum 129	24.79	56.53	7.43	9.16	0.15	1.93	0.01				Spektrum 129	15.95	48.45	9.68	19.66	0.45	5.78	0.03				Spektrum 129	49.0899	11.1349	39.7752		0.206197
Spektrum 130	24.14	57.24	7.42	9.15	0.12	1.93	0				Spektrum 130	15.53	49.03	9.66	19.63	0.37	5.77	0.02				Spektrum 130	49.1407	11.0097	39.8496		0.206417
Spektrum 131	24.55	56.86	7.42	9.12	0.15	1.88	0.02				Spektrum 131	15.81	48.78	9.68	19.6	0.44	5.62	0.07				Spektrum 131	49.1662	10.9198	39.9139		0.202151
Spektrum 132	24.3	57.07	7.45	9.13	0.16	1.89	0				Spektrum 132	15.64	48.92	9.7	19.6	0.46	5.66	0.02				Spektrum 132	49.007	11.0038	39.9893		0.202355
Spektrum 133	24.35	57.06	7.43	9.09	0.14	1.93	0.01				Spektrum 133	15.67	48.92	9.68	19.51	0.4	5.77	0.04				Spektrum 133	48.9247	11.129	39.9462		0.206197
Spektrum 134	24.2	57.16	7.5	9.11	0.12	1.91	0.01				Spektrum 134	15.58	49.01	9.77	19.58	0.34	5.7	0.03				Spektrum 134	48.9008	10.8847	40.2145		0.202976
Ne-5a-1:	Atom%										Ne-5a-1:	Weight%										Ne-5a-1:
	C	O	Mg	Ca	Mn	Fe	Sr					C	O	Mg	Ca	Mn	Fe	Sr					(Ca,Sr)CO3	(Fe,Mn)CO3	MgCO3		Fe/(Fe+Mg)
Average	24.3999	57.0584	7.42587	9.07267	0.126667	1.90947	0.00706667				Average	15.7208	48.9659	9.68333	19.5047	0.3744	5.7184	0.0338667				Average	48.9691	10.9821	40.0488		0.204542
1sd	0.394882	0.354694	0.163055	0.0803216	0.0163571	0.130853	0.00891042				1sd	0.276992	0.297376	0.227539	0.143809	0.0466545	0.380645	0.0388121				1sd	0.227191	0.722399	0.790784
N	75	75	75	75	75	75	75				N	75	75	75	75	75	75	75				N	75	75	75
min	23.55	56.18	6.67	8.91	0.07	1.35	0				min	15.15	48.12	8.59	19.21	0.2	4.08	0				min	48.2759	7.75862	35.9181
max	25.31	57.91	8.16	9.28	0.16	2.64	0.03				max	16.32	49.62	10.76	19.87	0.48	7.8	0.15				max	49.5418	14.5934	43.9655
Ne-5b-1	(coated with gold)										Ne-5b-1											Ne-5b-1	MODAL-COMPOSITIONS (%)
	Atom%											Weight %
Area 2	C	O	Mg	Ca	Mn	Fe	Sr				Area 2	C	O	Mg	Ca	Mn	Fe	Sr				Area 2	(Ca,Sr)CO3	(Fe,Mn)CO3	MgCO3		Fe/(Fe+Mg)
Spektrum 15	23.33	57.56	7.56	9.34	0.13	2.07	0.01				Spektrum 15	14.89	48.92	9.77	19.88	0.37	6.13	0.04				Spektrum 15	48.9273	11.5123	39.5604		0.214953
Spektrum 16	23.47	57.59	7.57	9.23	0.12	2	0.01				Spektrum 16	15.02	49.1	9.81	19.72	0.36	5.96	0.03				Spektrum 16	48.8114	11.1992	39.9894		0.208986
Spektrum 18	23.74	57.3	7.61	9.26	0.14	1.95	0				Spektrum 18	15.21	48.89	9.87	19.79	0.4	5.82	0.02				Spektrum 18	48.8397	11.0232	40.1371		0.203975
Spektrum 19	22.81	58.04	7.67	9.34	0.14	2	0				Spektrum 19	14.55	49.32	9.91	19.88	0.4	5.93	0				Spektrum 19	48.7728	11.1749	40.0522		0.206825
Spektrum 20	23.66	57.31	7.56	9.26	0.13	2.06	0.02				Spektrum 20	15.11	48.77	9.77	19.75	0.37	6.12	0.11				Spektrum 20	48.7651	11.5081	39.7267		0.214137
Spektrum 21	23.59	57.7	7.27	9.21	0.12	2.08	0.02				Spektrum 21	15.09	49.18	9.42	19.66	0.36	6.18	0.1				Spektrum 21	49.3583	11.7647	38.877		0.22246
Spektrum 22	23.66	57.5	7.35	9.31	0.12	2.04	0.02				Spektrum 22	15.13	48.98	9.52	19.87	0.36	6.07	0.08				Spektrum 22	49.5223	11.465	39.0127		0.217252
Spektrum 23	23.76	57.12	7.66	9.3	0.15	2.01	0				Spektrum 23	15.19	48.64	9.92	19.84	0.44	5.96	0				Spektrum 23	48.6402	11.2971	40.0628		0.207859
Area 3	C	O	Mg	Ca	Mn	Fe	Sr				Area 3	C	O	Mg	Ca	Mn	Fe	Sr				Area 3	(Ca,Sr)CO3	(Fe,Mn)CO3	MgCO3		Fe/(Fe+Mg)
Spektrum 31	23.92	57.3	7.5	9.16	0.12	1.97	0.02				Spektrum 31	15.35	48.97	9.73	19.61	0.36	5.89	0.09				Spektrum 31	48.9078	11.1348	39.9574		0.208025
Spektrum 33	24.23	57.05	7.52	9.1	0.12	1.97	0.01				Spektrum 33	15.58	48.85	9.78	19.52	0.36	5.89	0.04				Spektrum 33	48.6645	11.1645	40.1709		0.207587
Spektrum 34	23.81	57.22	7.64	9.19	0.15	1.98	0				Spektrum 34	15.26	48.84	9.9	19.65	0.44	5.91	0				Spektrum 34	48.4705	11.2342	40.2954		0.205821
Spektrum 36	22.79	58.08	7.71	9.49	0.12	1.82	0				Spektrum 36	14.57	49.47	9.98	20.24	0.34	5.4	0				Spektrum 36	49.582	10.1358	40.2821		0.190976
Spektrum 38	23.44	57.72	6.62	9.42	0.18	2.62	0				Spektrum 38	14.82	48.61	8.48	19.88	0.51	7.7	0				Spektrum 38	50	14.862	35.138		0.28355
Spektrum 39	23.78	57.29	6.62	9.38	0.19	2.73	0.01				Spektrum 39	15.01	48.17	8.45	19.76	0.53	8.02	0.06				Spektrum 39	49.6038	15.4253	34.9709		0.291979
Spektrum 40	23.05	57.9	7.59	9.32	0.13	2	0.01				Spektrum 40	14.72	49.25	9.8	19.87	0.38	5.95	0.03				Spektrum 40	48.9764	11.1811	39.8425		0.208551
Spektrum 41	23.87	57.36	7.55	9.16	0.13	1.95	0				Spektrum 41	15.32	49.06	9.81	19.62	0.37	5.81	0				Spektrum 41	48.7493	11.0697	40.1809		0.205263
Spektrum 42	23.88	57.21	7.57	9.21	0.13	1.99	0.01				Spektrum 42	15.3	48.82	9.82	19.68	0.38	5.93	0.06				Spektrum 42	48.7573	11.211	40.0317		0.208159
Area 4	C	O	Mg	Ca	Mn	Fe	Sr				Area 4	C	O	Mg	Ca	Mn	Fe	Sr				Area 4	(Ca,Sr)CO3	(Fe,Mn)CO3	MgCO3		Fe/(Fe+Mg)
Spektrum 61	24.48	56.83	7.52	9.23	0.12	1.83	0				Spektrum 61	15.77	48.76	9.8	19.84	0.34	5.48	0				Spektrum 61	49.3583	10.4278	40.2139		0.195722
Spektrum 62	23.87	57.17	7.8	9.29	0.12	1.74	0.01				Spektrum 62	15.35	48.98	10.16	19.93	0.34	5.21	0.03				Spektrum 62	49.0506	9.81013	41.1392		0.18239
Spektrum 63	23.7	57.43	7.64	9.26	0.12	1.85	0				Spektrum 63	15.22	49.13	9.93	19.84	0.35	5.53	0				Spektrum 63	49.0726	10.4399	40.4875		0.194942
Spektrum 64	24.07	57.08	7.58	9.24	0.16	1.87	0				Spektrum 64	15.46	48.83	9.85	19.79	0.46	5.59	0.02				Spektrum 64	49.0186	10.7692	40.2122		0.197884
Spektrum 65	23.55	57.46	7.85	9.26	0.08	1.77	0.02				Spektrum 65	15.13	49.17	10.21	19.86	0.24	5.3	0.09				Spektrum 65	48.8936	9.7471	41.3593		0.183992
Spektrum 66	24	57.32	7.44	9.13	0.13	1.97	0.01				Spektrum 66	15.42	49.04	9.67	19.56	0.37	5.89	0.05				Spektrum 66	48.9293	11.242	39.8287		0.209352
Spektrum 67	23.65	57.59	7.64	9.29	0.11	1.72	0				Spektrum 67	15.23	49.39	9.96	19.95	0.33	5.14	0				Spektrum 67	49.5203	9.7548	40.7249		0.183761
Spektrum 68	23.53	57.65	7.54	9.2	0.15	1.91	0.01				Spektrum 68	15.09	49.25	9.79	19.69	0.44	5.69	0.05				Spektrum 68	48.9633	10.9516	40.0851		0.202116
Spektrum 72	23.71	57.36	7.85	9.34	0.1	1.64	0				Spektrum 72	15.27	49.21	10.23	20.07	0.29	4.92	0				Spektrum 72	49.3397	9.19176	41.4686		0.172813
Area 5	C	O	Mg	Ca	Mn	Fe	Sr				Area 5	C	O	Mg	Ca	Mn	Fe	Sr				Area 5	(Ca,Sr)CO3	(Fe,Mn)CO3	MgCO3		Fe/(Fe+Mg)
Spektrum 80	24.47	57.04	7.38	9	0.14	1.97	0				Spektrum 80	15.77	48.96	9.63	19.34	0.4	5.9	0				Spektrum 80	48.675	11.4116	39.9135		0.210695
Spektrum 81	24.39	57.18	7.23	9.06	0.14	1.99	0				Spektrum 81	15.7	49.03	9.43	19.47	0.42	5.95	0				Spektrum 81	49.1857	11.5635	39.2508		0.215835
Spektrum 84	23.67	57.8	7.26	9.09	0.12	2.05	0.01				Spektrum 84	15.19	49.41	9.43	19.47	0.36	6.11	0.03				Spektrum 84	49.1096	11.7107	39.1797		0.220193
Spektrum 85	23.8	57.38	7.42	9.22	0.14	2.04	0				Spektrum 85	15.24	48.94	9.62	19.71	0.41	6.08	0				Spektrum 85	48.9904	11.5834	39.4261		0.215645
Spektrum 86	24.08	57.25	7.37	9.14	0.13	2.03	0				Spektrum 86	15.46	48.95	9.58	19.57	0.39	6.06	0				Spektrum 86	48.9555	11.5694	39.4751		0.215957
Spektrum 87	24.02	57.37	7.35	9.1	0.15	2	0				Spektrum 87	15.43	49.08	9.56	19.5	0.45	5.96	0.02				Spektrum 87	48.9247	11.5591	39.5161		0.213904
Area 7	C	O	Mg	Ca	Mn	Fe	Sr				Area 7	C	O	Mg	Ca	Mn	Fe	Sr				Area 7	(Ca,Sr)CO3	(Fe,Mn)CO3	MgCO3		Fe/(Fe+Mg)
Spektrum 111	23.65	57.36	7.68	9.26	0.15	1.89	0				Spektrum 111	15.16	48.98	9.97	19.82	0.44	5.64	0.01				Spektrum 111	48.7882	10.7482	40.4636		0.197492
Spektrum 112	23.05	58.03	7.5	9.27	0.13	2.02	0				Spektrum 112	14.73	49.39	9.7	19.76	0.39	6.01	0.01				Spektrum 112	48.9958	11.3636	39.6406		0.212185
Spektrum 113	24.01	57.42	7.73	9.1	0.13	1.59	0.01				Spektrum 113	15.53	49.46	10.12	19.64	0.39	4.79	0.06				Spektrum 113	49.0841	9.26724	41.6487		0.170601
Spektrum 114	23.62	57.27	7.87	9.37	0.1	1.76	0				Spektrum 114	15.16	48.97	10.23	20.07	0.29	5.26	0.01				Spektrum 114	49.0576	9.73822	41.2042		0.182762
Spektrum 115	24.45	56.92	7.71	9.13	0.09	1.71	0				Spektrum 115	15.8	49.01	10.09	19.69	0.25	5.15	0				Spektrum 115	48.9807	9.65665	41.3627		0.181529
Area 8	C	O	Mg	Ca	Mn	Fe	Sr				Area 8	C	O	Mg	Ca	Mn	Fe	Sr				Area 8	(Ca,Sr)CO3	(Fe,Mn)CO3	MgCO3		Fe/(Fe+Mg)
Spektrum 116	24.01	57.41	7.54	9.05	0.1	1.86	0.01				Spektrum 116	15.47	49.28	9.84	19.46	0.3	5.59	0.06				Spektrum 116	48.8147	10.5603	40.625		0.197872
Spektrum 117	24.02	57.29	7.64	9.13	0.11	1.79	0				Spektrum 117	15.49	49.19	9.97	19.65	0.33	5.37	0.01				Spektrum 117	48.902	10.1768	40.9213		0.18982
Spektrum 118	24.4	57.14	7.64	9.04	0.12	1.66	0				Spektrum 118	15.8	49.28	10.01	19.54	0.35	5.01	0				Spektrum 118	48.9707	9.64247	41.3868		0.178495
Spektrum 119	24.44	56.77	7.48	9.23	0.12	1.96	0.01				Spektrum 119	15.69	48.57	9.72	19.78	0.36	5.84	0.03				Spektrum 119	49.1489	11.0638	39.7872		0.207627
Spektrum 120	24.42	57.09	7.43	9.02	0.11	1.92	0				Spektrum 120	15.75	49.04	9.7	19.41	0.33	5.77	0				Spektrum 120	48.8095	10.9848	40.2056		0.205348
Spektrum 121	23.32	58.02	7.56	9.19	0.12	1.8	0				Spektrum 121	15	49.71	9.85	19.72	0.34	5.39	0				Spektrum 121	49.2234	10.2839	40.4928		0.192308
Spektrum 122	23.56	57.98	7.44	8.99	0.13	1.88	0.01				Spektrum 122	15.17	49.73	9.7	19.32	0.39	5.64	0.05				Spektrum 122	48.7805	10.8943	40.3252		0.201717
Spektrum 123	23.98	57.56	7.5	8.96	0.13	1.86	0.01				Spektrum 123	15.47	49.45	9.79	19.28	0.38	5.59	0.04				Spektrum 123	48.5915	10.7801	40.6284		0.198718
Spektrum 124	23.59	57.75	7.78	9.11	0.11	1.64	0.02				Spektrum 124	15.22	49.64	10.17	19.61	0.33	4.93	0.09				Spektrum 124	48.9282	9.37835	41.6935		0.174098
Spektrum 125	24.78	56.57	7.54	9.14	0.14	1.84	0				Spektrum 125	15.98	48.59	9.84	19.67	0.4	5.51	0.01				Spektrum 125	48.9818	10.6109	40.4073		0.196162
Spektrum 126	24.37	57.01	7.51	9.16	0.11	1.85	0				Spektrum 126	15.7	48.94	9.79	19.7	0.31	5.55	0				Spektrum 126	49.168	10.5207	40.3113		0.19765
Spektrum 127	24.07	57.38	7.47	9.06	0.11	1.92	0.01				Spektrum 127	15.5	49.21	9.73	19.46	0.31	5.74	0.05				Spektrum 127	48.8422	10.9316	40.2262		0.204473
Ne-5b-1:	Atom%										Ne-5b-1:	Weight%										Ne-5b-1:
	C	O	Mg	Ca	Mn	Fe	Sr					C	O	Mg	Ca	Mn	Fe	Sr					(Ca,Sr)CO3	(Fe,Mn)CO3	MgCO3		Fe/(Fe+Mg)
Average	23.8269	57.3904	7.51959	9.19878	0.127347	1.93	0.00571429				Average	15.2953	49.0696	9.77163	19.7018	0.371633	5.76041	0.0281633				Average	49.0082	10.953	40.0388		0.204242
1sd	0.429433	0.337312	0.236522	0.117067	0.020079	0.197587	0.00699854				1sd	0.323653	0.303173	0.334202	0.196497	0.0565089	0.559497	0.0317306				1sd	0.289626	1.10869	1.22442
N	49	49	49	49	49	49	49				N	49	49	49	49	49	49	49				N	49	49	49
min	22.79	56.57	6.62	8.96	0.08	1.59	0				min	14.55	48.17	8.45	19.28	0.24	4.79	0				min	48.4705	9.19176	34.9709
max	24.78	58.08	7.87	9.49	0.19	2.73	0.02				max	15.98	49.73	10.23	20.24	0.53	8.02	0.11				max	50	15.4253	41.6935

## Sheet: Magnesite
Ne-3a											Ne-3a											Ne-3a	MODAL-COMPOSITIONS (%)
		Atom%											Weight%
Profile		O	Mg	Ca	Mn	Fe	Sr				Profile		O	Mg	Ca	Mn	Fe	Sr				Profile	(Ca,Sr)CO3	(Fe,Mn)CO3	MgCO3		Fe/(Fe+Mg)
Spektrum 1		67.4	21.71	0.45	0.42	10.03	0				Spektrum 1		48.86	23.91	0.81	1.04	25.37	0				Spektrum 1	1.37994	32.0454	66.5747		0.316005
Spektrum 2		67.36	21.49	0.37	0.43	10.34	0.01				Spektrum 2		48.62	23.56	0.67	1.06	26.04	0.05				Spektrum 2	1.16422	32.9963	65.8395		0.324851
Spektrum 3		67.29	21.29	0.32	0.41	10.69	0				Spektrum 3		48.34	23.24	0.58	1.01	26.8	0.02				Spektrum 3	0.978294	33.9346	65.0871		0.334271
Spektrum 4		67.4	21.43	0.36	0.42	10.38	0.01				Spektrum 4		48.63	23.5	0.66	1.05	26.14	0.02				Spektrum 4	1.13497	33.1288	65.7362		0.326312
Spektrum 5		67.29	21.55	0.38	0.41	10.38	0				Spektrum 5		48.54	23.63	0.69	1.01	26.13	0				Spektrum 5	1.16137	32.9768	65.8619		0.325086
Spektrum 6		67.36	21.56	0.4	0.39	10.28	0.01				Spektrum 6		48.67	23.68	0.72	0.98	25.92	0.03				Spektrum 6	1.25613	32.69	66.0539		0.322864
Spektrum 7		67.37	21.49	0.42	0.42	10.29	0.01				Spektrum 7		48.64	23.58	0.75	1.04	25.94	0.05				Spektrum 7	1.31781	32.8226	65.8596		0.323789
Spektrum 75		67.9	21.43	0.44	0.39	9.83	0.01				Spektrum 75		49.46	23.72	0.8	0.99	25	0.03				Spektrum 75	1.40187	31.838	66.7601		0.314459
Spektrum 76		67.67	21.6	0.48	0.41	9.83	0.01				Spektrum 76		49.23	23.88	0.88	1.03	24.95	0.03				Spektrum 76	1.51562	31.6734	66.811		0.312759
Spektrum 77		67.81	21.51	0.49	0.39	9.79	0				Spektrum 77		49.39	23.8	0.9	0.98	24.9	0.02				Spektrum 77	1.52268	31.6346	66.8428		0.31278
Ne-3a		Atom%									Ne-3a		Weight%									Ne-3a	MODAL-COMPOSITIONS (%)
		O	Mg	Ca	Mn	Fe	Sr						O	Mg	Ca	Mn	Fe	Sr					(Ca,Sr)CO3	(Fe,Mn)CO3	MgCO3		Fe/(Fe+Mg)
Average		67.485	21.506	0.411	0.409	10.184	0.006				Average		48.838	23.65	0.746	1.019	25.719	0.025				Average	1.28329	32.574	66.1427		0.321363
1sd		0.211436	0.10679	0.0520481	0.0137477	0.28412	0.00489898				1sd		0.366164	0.18783	0.0965609	0.0277308	0.600657	0.0162788				1sd	0.167536	0.713417	0.55162
N		10	10	10	10	10	10				N		10	10	10	10	10	10				N	10	10	10
min		67.29	21.29	0.32	0.39	9.79	0				min		48.34	23.24	0.58	0.98	24.9	0				min	0.978294	31.6346	65.0871
max		67.9	21.71	0.49	0.43	10.69	0.01				max		49.46	23.91	0.9	1.06	26.8	0.05				max	1.52268	33.9346	66.8428
Ne-3b		Atom%									Ne-3b		Weight%
																						Ne-3b
Area 1		O	Mg	Ca	Mn	Fe	Sr				Area 1		O	Mg	Ca	Mn	Fe	Sr				Area 1	(Ca,Sr)CO3	(Fe,Mn)CO3	MgCO3		Fe/(Fe+Mg)
Magnesit 1		68.22	21.28	0.42	0.39	9.69	0				Magnesit 1		49.88	23.64	0.77	0.97	24.73	0				Magnesit 1	1.32159	31.7181	66.9604		0.312883
Area 3											Area 3											Area 3	(Ca,Sr)CO3	(Fe,Mn)CO3	MgCO3		Fe/(Fe+Mg)
Magnesit 1		67.28	21.73	0.39	0.43	10.17	0				Magnesit 1		48.66	23.88	0.71	1.06	25.69	0				Magnesit 1	1.19193	32.3961	66.412		0.318809
Magnesit 2		67.4	21.56	0.42	0.42	10.19	0				Magnesit 2		48.76	23.7	0.77	1.04	25.74	0				Magnesit 2	1.28874	32.556	66.1553		0.320945
Magnesit 3		67.15	21.92	0.43	0.41	10.1	0				Magnesit 3		48.6	24.1	0.77	1.01	25.52	0				Magnesit 3	1.30858	31.9842	66.7072		0.315428
Magnesit 4		67.93	21.04	0.34	0.44	10.25	0				Magnesit 4		49.21	23.16	0.62	1.1	25.91	0				Magnesit 4	1.06018	33.3333	65.6065		0.327581
Magnesit 5		67.75	21.31	0.41	0.42	10.09	0.01				Magnesit 5		49.12	23.48	0.74	1.05	25.55	0.05				Magnesit 5	1.30273	32.5993	66.098		0.321338
Area 4											Area 4											Area 4	(Ca,Sr)CO3	(Fe,Mn)CO3	MgCO3		Fe/(Fe+Mg)
Magnesit 1		68.17	20.87	0.41	0.38	10.15	0.03				Magnesit 1		49.48	23.02	0.74	0.94	25.72	0.11				Magnesit 1	1.38191	33.0716	65.5465		0.327208
Magnesit 3		67.97	21.57	0.41	0.41	9.63	0				Magnesit 3		49.67	23.96	0.76	1.03	24.58	0				Magnesit 3	1.28045	31.3554	67.3641		0.308654
Magnesit 4		68.27	21.48	0.39	0.38	9.47	0.01				Magnesit 4		50.09	23.95	0.73	0.96	24.24	0.02				Magnesit 4	1.26064	31.0432	67.6962		0.305977
Magnesit 5		67.81	21.66	0.45	0.4	9.68	0				Magnesit 5		49.49	24.03	0.82	1	24.66	0				Magnesit 5	1.39795	31.3141	67.288		0.30887
Area 5											Area 5											Area 5	(Ca,Sr)CO3	(Fe,Mn)CO3	MgCO3		Fe/(Fe+Mg)
Magnesit 1		68.14	21.28	0.41	0.38	9.78	0				Magnesit 1		49.74	23.61	0.75	0.95	24.93	0.02				Magnesit 1	1.28728	31.8995	66.8132		0.314874
Magnesit 2		68.2	18.66	0.27	0.4	12.47	0				Magnesit 2		47.98	19.95	0.47	0.97	30.62	0				Magnesit 2	0.849057	40.4717	58.6792		0.400578
Magnesit 3		67.99	21.31	0.41	0.4	9.9	0				Magnesit 3		49.52	23.59	0.74	0.99	25.16	0.01				Magnesit 3	1.28045	32.1674	66.5522		0.317206
Magnesit 4		67.39	21.53	0.36	0.44	10.28	0.01				Magnesit 4		48.68	23.63	0.65	1.09	25.92	0.03				Magnesit 4	1.13427	32.8633	66.0025		0.323169
Magnesit 5		67.43	21.73	0.41	0.41	10.01	0				Magnesit 5		48.92	23.96	0.74	1.03	25.36	0				Magnesit 5	1.25921	32.0025	66.7383		0.315375
Magnesit 6		67.25	21.3	0.32	0.41	10.7	0.02				Magnesit 6		48.28	23.23	0.58	1.01	26.82	0.07				Magnesit 6	1.03817	33.9237	65.0382		0.334375
Magnesit 7		67.54	21.75	0.43	0.43	9.84	0				Magnesit 7		49.11	24.03	0.79	1.08	24.99	0				Magnesit 7	1.32512	31.6487	67.0262		0.311491
Area 6											Area 6											Area 6	(Ca,Sr)CO3	(Fe,Mn)CO3	MgCO3		Fe/(Fe+Mg)
Magnesit 1		67.45	22.15	0.4	0.41	9.59	0				Magnesit 1		49.24	24.56	0.73	1.03	24.43	0.01				Magnesit 1	1.22888	30.722	68.0492		0.302142
Magnesit 2		68.17	21.61	0.32	0.38	9.51	0.02				Magnesit 2		49.99	24.08	0.59	0.95	24.34	0.06				Magnesit 2	1.06784	31.0616	67.8706		0.305591
Magnesit 3		67.53	22.21	0.4	0.38	9.46	0.01				Magnesit 3		49.4	24.69	0.74	0.96	24.15	0.05				Magnesit 3	1.26309	30.3142	68.4227		0.298705
Magnesit 4		67.52	22.22	0.4	0.39	9.46	0.01				Magnesit 4		49.4	24.7	0.74	0.99	24.15	0.03				Magnesit 4	1.26232	30.3264	68.4113		0.298611
Magnesit 5		67.36	22.34	0.43	0.41	9.44	0.01				Magnesit 5		49.23	24.81	0.79	1.03	24.08	0.05				Magnesit 5	1.34845	30.1869	68.4646		0.297042
Magnesit 6		67.5	22.27	0.44	0.38	9.39	0.01				Magnesit 6		49.41	24.77	0.81	0.97	24	0.04				Magnesit 6	1.38504	30.0708	68.5442		0.296589
Magnesit 7		67.47	22.29	0.43	0.4	9.4	0.01				Magnesit 7		49.37	24.78	0.79	1.02	24.02	0.02				Magnesit 7	1.3526	30.126	68.5214		0.296624
Magnesit 8		67.8	22.14	0.11	0.45	9.5	0.01				Magnesit 8		49.69	24.66	0.2	1.13	24.3	0.02				Magnesit 8	0.372555	30.891	68.7364		0.300253
Magnesit 9		67.84	21.92	0.43	0.4	9.39	0.02				Magnesit 9		49.71	24.41	0.78	1.01	24.02	0.07				Magnesit 9	1.39925	30.4415	68.1592		0.299904
Area 7											Area 7											Area 7	(Ca,Sr)CO3	(Fe,Mn)CO3	MgCO3		Fe/(Fe+Mg)
Magnesit 1		68.43	20.78	0.51	0.42	9.85	0				Magnesit 1		49.9	23.02	0.93	1.06	25.08	0.01				Magnesit 1	1.61597	32.5412	65.8428		0.32158
Magnesit 2		68.35	21.43	0.44	0.39	9.37	0.01				Magnesit 2		50.2	23.92	0.81	0.98	24.03	0.05				Magnesit 2	1.42225	30.847	67.7307		0.304221
Magnesit 3		67.79	21.9	0.39	0.37	9.54	0				Magnesit 3		49.61	24.36	0.72	0.92	24.38	0.01				Magnesit 3	1.21118	30.7764	68.0124		0.303435
Magnesit 4		68.25	21.72	0.36	0.36	9.29	0.01				Magnesit 4		50.23	24.29	0.66	0.92	23.87	0.03				Magnesit 4	1.16572	30.4033	68.431		0.299581
Magnesit 5		67.47	22.27	0.34	0.4	9.53	0				Magnesit 5		49.33	24.74	0.61	1	24.32	0				Magnesit 5	1.04487	30.5163	68.4388		0.299686
Magnesit 6		67.66	21.67	0.38	0.43	9.86	0				Magnesit 6		49.23	23.96	0.69	1.08	25.05	0				Magnesit 6	1.17502	31.8182	67.0068		0.312718
Magnesit 7		68.04	21.57	0.4	0.4	9.59	0				Magnesit 7		49.78	23.98	0.73	1.02	24.49	0				Magnesit 7	1.25156	31.2578	67.4906		0.307766
Magnesit 8		68.23	21.57	0.42	0.37	9.4	0.01				Magnesit 8		50.1	24.07	0.77	0.94	24.09	0.02				Magnesit 8	1.35348	30.7523	67.8942		0.30352
Magnesit 9		68.42	21.34	0.46	0.37	9.41	0.01				Magnesit 9		50.26	23.82	0.84	0.94	24.12	0.02				Magnesit 9	1.48781	30.9592	67.553		0.306016
Magnesit 10		67.94	21.91	0.31	0.41	9.42	0				Magnesit 10		49.84	24.42	0.57	1.04	24.13	0				Magnesit 10	0.967239	30.6708	68.3619		0.30067
Area 8											Area 8											Area 8	(Ca,Sr)CO3	(Fe,Mn)CO3	MgCO3		Fe/(Fe+Mg)
Magnesit 1		68.09	21.1	0.28	0.41	10.12	0				Magnesit 1		49.49	23.31	0.52	1.01	25.68	0				Magnesit 1	0.877468	32.9991	66.1235		0.324151
Magnesit 2		67.94	20.57	0.32	0.42	10.75	0				Magnesit 2		48.89	22.49	0.57	1.04	27	0.01				Magnesit 2	0.998129	34.8409	64.1609		0.343231
Magnesit 3		67.15	21.54	0.34	0.42	10.55	0				Magnesit 3		48.3	23.55	0.62	1.03	26.49	0				Magnesit 3	1.03501	33.3942	65.5708		0.328763
Magnesit 4		67.88	21.33	0.4	0.41	9.97	0.01				Magnesit 4		49.35	23.56	0.73	1.03	25.3	0.03				Magnesit 4	1.27646	32.3163	66.4072		0.31853
Magnesit 5		67.33	21.25	0.32	0.42	10.67	0				Magnesit 5		48.39	23.21	0.57	1.04	26.78	0.01				Magnesit 5	0.979792	33.9559	65.0643		0.334273
Magnesit 6		68.03	21.01	0.36	0.39	10.2	0.01				Magnesit 6		49.35	23.16	0.65	0.97	25.83	0.04				Magnesit 6	1.15734	33.1248	65.7179		0.326818
Magnesit 7		68.01	21.19	0.33	0.4	10.08	0.01				Magnesit 7		49.43	23.4	0.6	0.99	25.56	0.03				Magnesit 7	1.06217	32.7398	66.1981		0.322354
Magnesit 8		67.61	21.26	0.39	0.41	10.32	0				Magnesit 8		48.86	23.34	0.71	1.03	26.04	0.01				Magnesit 8	1.20445	33.1377	65.6578		0.326789
Magnesit 9		67.77	21.34	0.39	0.41	10.09	0.01				Magnesit 9		49.16	23.52	0.7	1.02	25.54	0.05				Magnesit 9	1.24069	32.5682	66.1911		0.321031
Magnesit 10		67.51	21.35	0.41	0.39	10.33	0				Magnesit 10		48.78	23.45	0.74	0.98	26.06	0				Magnesit 10	1.26232	33.0049	65.7328		0.326073
Magnesit 11		67.49	21.55	0.39	0.4	10.17	0				Magnesit 11		48.87	23.72	0.71	1	25.7	0				Magnesit 11	1.19963	32.5131	66.2873		0.320618
Area 9											Area 9											Area 9	(Ca,Sr)CO3	(Fe,Mn)CO3	MgCO3		Fe/(Fe+Mg)
Magnesit 1		68.14	21.19	0.39	0.39	9.89	0				Magnesit 1		49.67	23.47	0.72	0.99	25.16	0				Magnesit 1	1.22411	32.2662	66.5097		0.318211
Magnesit 2		67.53	21.16	0.1	0.36	10.85	0				Magnesit 2		48.57	23.12	0.18	0.89	27.23	0.01				Magnesit 2	0.307977	34.5242	65.1678		0.338957
Magnesit 3		68.2	21.2	0.41	0.4	9.78	0				Magnesit 3		49.79	23.52	0.76	1	24.92	0.02				Magnesit 3	1.28971	32.0226	66.6876		0.315688
Ne-3b		Atom%									Ne-3b		Weight%									Ne-3b	MODAL-COMPOSITIONS (%)
		O	Mg	Ca	Mn	Fe	Sr						O	Mg	Ca	Mn	Fe	Sr					(Ca,Sr)CO3	(Fe,Mn)CO3	MgCO3		Fe/(Fe+Mg)
Average		67.7876	21.5443	0.379796	0.402041	9.87959	0.00530612				Average		49.3476	23.8333	0.693061	1.00653	25.0992	0.0206122				Average	1.19611	31.9177	66.8862		0.314398
1sd		0.354352	0.416207	0.0716707	0.0205018	0.413566	0.00702823				1sd		0.511678	0.548491	0.131881	0.0489711	0.890005	0.0241093				1sd	0.226277	1.20534	1.14325
N		49	49	49	49	49	49				N		49	49	49	49	49	49				N	49	49	49
min		67.15	20.57	0.1	0.36	9.29	0				min		48.28	22.49	0.18	0.89	23.87	0				min	0.307977	30.0708	64.1609
max		68.43	22.34	0.51	0.45	10.85	0.03				max		50.26	24.81	0.93	1.13	27.23	0.11				max	1.61597	34.8409	68.7364
Ne-4											Ne-4											Ne-4
Area 1		O	Mg	Ca	Mn	Fe	Sr				Area 1		O	Mg	Ca	Mn	Fe	Sr				Area 1	(Ca,Sr)CO3	(Fe,Mn)CO3	MgCO3		Fe/(Fe+Mg)
Magnesite 1		67.27	21.85	0.21	0.43	10.23	0				Magnesite 1		48.68	24.03	0.38	1.06	25.85	0				Magnesite 1	0.641809	32.5795	66.7787		0.31889
Magnesite 2		67.81	21.3	0.42	0.39	10.06	0.01				Magnesite 2		49.22	23.5	0.76	0.98	25.5	0.04				Magnesite 2	1.33623	32.4736	66.1902		0.320791
Magnesite 3		67.92	21.44	0.39	0.39	9.84	0.03				Magnesite 3		49.48	23.73	0.71	0.97	25.01	0.11				Magnesite 3	1.30882	31.8791	66.8121		0.314578
Magnesite 4		67.69	21.37	0.43	0.38	10.14	0				Magnesite 4		49.08	23.54	0.78	0.95	25.66	0				Magnesite 4	1.33045	32.5495	66.12		0.321803
Magnesite 5		67.5	21.64	0.36	0.41	10.09	0				Magnesite 5		48.94	23.85	0.65	1.03	25.54	0				Magnesite 5	1.10769	32.3077	66.5846		0.317996
Area 2											Area 2											Area 2	(Ca,Sr)CO3	(Fe,Mn)CO3	MgCO3		Fe/(Fe+Mg)
Spektrum 30		67.61	21.41	0.36	0.41	10.22	0				Spektrum 30		48.96	23.56	0.65	1.01	25.82	0				Spektrum 30	1.11111	32.8086	66.0802		0.323111
Spektrum 31		67.76	21.29	0.36	0.4	10.2	0				Spektrum 31		49.12	23.45	0.65	0.98	25.8	0				Spektrum 31	1.11628	32.8682	66.0155		0.323912
Spektrum 32		67.89	21.27	0.34	0.44	10.05	0.01				Spektrum 32		49.3	23.47	0.61	1.11	25.47	0.05				Spektrum 32	1.09	32.669	66.241		0.320881
Spektrum 33		67.22	21.73	0.34	0.4	10.29	0.01				Spektrum 33		48.55	23.85	0.61	1	25.95	0.04				Spektrum 33	1.06805	32.6213	66.3106		0.321362
Spektrum 34		67.23	21.59	0.33	0.42	10.43	0				Spektrum 34		48.46	23.65	0.59	1.05	26.25	0				Spektrum 34	1.00702	33.1096	65.8834		0.325734
Area 3											Area 3											Area 3	(Ca,Sr)CO3	(Fe,Mn)CO3	MgCO3		Fe/(Fe+Mg)
Magnesit 1		67.97	21.22	0.34	0.41	10.05	0				Magnesit 1		49.41	23.44	0.63	1.02	25.49	0				Magnesit 1	1.06184	32.6671	66.2711		0.321394
Magnesit 2		67.46	21.58	0.31	0.4	10.24	0.01				Magnesit 2		48.82	23.74	0.56	1	25.86	0.03				Magnesit 2	0.983405	32.6982	66.3184		0.32181
Magnesit 3		67.65	21.4	0.34	0.42	10.18	0.02				Magnesit 3		48.99	23.55	0.61	1.04	25.73	0.07				Magnesit 3	1.11248	32.7565	66.131		0.322356
Magnesit 4		67.73	21.42	0.31	0.4	10.14	0				Magnesit 4		49.14	23.61	0.57	1.01	25.67	0				Magnesit 4	0.960645	32.6619	66.3774		0.321293
Area 4											Area 4											Area 4	(Ca,Sr)CO3	(Fe,Mn)CO3	MgCO3		Fe/(Fe+Mg)
Magnesit 1		67.95	21.07	0.34	0.4	10.23	0.01				Magnesit 1		49.26	23.21	0.62	1	25.88	0.03				Magnesit 1	1.09204	33.1669	65.741		0.326837
Magnesit 2		67.84	21.41	0.36	0.41	9.98	0				Magnesit 2		49.34	23.66	0.65	1.02	25.33	0				Magnesit 2	1.1194	32.3072	66.5734		0.317936
Area 5											Area 5											Area 5	(Ca,Sr)CO3	(Fe,Mn)CO3	MgCO3		Fe/(Fe+Mg)
Magnesit 1		67.6	21.35	0.32	0.41	10.31	0.01				Magnesit 1		48.88	23.46	0.59	1.02	26.03	0.04				Magnesit 1	1.01852	33.0864	65.8951		0.325648
Magnesit 2		67.96	21.34	0.35	0.4	9.95	0				Magnesit 2		49.47	23.6	0.63	1.01	25.29	0				Magnesit 2	1.09238	32.3034	66.6042		0.317993
Magnesit 3		67.38	21.45	0.29	0.4	10.46	0.01				Magnesit 3		48.6	23.51	0.53	0.99	26.34	0.02				Magnesit 3	0.919963	33.3027	65.7774		0.327797
Magnesit 4		67.55	21.48	0.32	0.4	10.24	0				Magnesit 4		48.9	23.62	0.59	1	25.88	0.01				Magnesit 4	0.986436	32.799	66.2145		0.322825
Magnesit 5		67.58	21.33	0.33	0.4	10.36	0				Magnesit 5		48.84	23.43	0.59	0.99	26.15	0				Magnesit 5	1.01789	33.1894	65.7927		0.326917
Magnesit 6		67.52	21.42	0.4	0.43	10.22	0				Magnesit 6		48.84	23.54	0.73	1.08	25.8	0.02				Magnesit 6	1.23191	32.7995	65.9686		0.323009
Area 6											Area 6											Area 6	(Ca,Sr)CO3	(Fe,Mn)CO3	MgCO3		Fe/(Fe+Mg)
Spektrum 103		67.73	21.65	0.23	0.38	9.99	0.01				Spektrum 103		49.27	23.94	0.41	0.95	25.38	0.05				Spektrum 103	0.743955	32.1451	67.111		0.31574
Ne-4		Atom%									Ne-4		Weight%									Ne-4	MODAL-COMPOSITIONS (%)
		O	Mg	Ca	Mn	Fe	Sr						O	Mg	Ca	Mn	Fe	Sr					(Ca,Sr)CO3	(Fe,Mn)CO3	MgCO3		Fe/(Fe+Mg)
Average		67.6443	21.4352	0.338261	0.405652	10.1696	0.00565217				Average		49.0239	23.6061	0.613043	1.01174	25.7252	0.0221739				Average	1.06341	32.6848	66.2518		0.321773
1sd		0.226463	0.171334	0.0495767	0.0146928	0.150318	0.00770437				1sd		0.288244	0.182107	0.0903825	0.0374923	0.314032	0.0281234				1sd	0.15878	0.34521	0.352298
N		23	23	23	23	23	23				N		23	23	23	23	23	23				N	23	23	23
min		67.22	21.07	0.21	0.38	9.84	0				min		48.46	23.21	0.38	0.95	25.01	0				min	0.641809	31.8791	65.741
max		67.97	21.85	0.43	0.44	10.46	0.03				max		49.48	24.03	0.78	1.11	26.34	0.11				max	1.33623	33.3027	67.111
NE-5a-1	(coated with gold)										NE-5a-1											NE-5a-1	MODAL-COMPOSITIONS (%)
	Atom%											Weight %
Area 2	C	O	Mg	Ca	Mn	Fe	Sr				Area 2	C	O	Mg	Ca	Mn	Fe	Sr				Area 2	(Ca,Sr)CO3	(Fe,Mn)CO3	MgCO3		Fe/(Fe+Mg)
Spektrum 2	25.43	56.62	10.57	0.09	0.22	7.06	0				Spektrum 2	16.26	48.22	13.68	0.19	0.64	21	0.01				Spektrum 2	0.501672	40.5797	58.9186		0.400454
Spektrum 3	25.34	56.79	10.66	0.12	0.21	6.87	0				Spektrum 3	16.26	48.53	13.84	0.26	0.62	20.5	0				Spektrum 3	0.671892	39.6417	59.6865		0.3919
Spektrum 4	24.62	57.14	10.73	0.14	0.24	7.11	0.02				Spektrum 4	15.66	48.41	13.82	0.3	0.71	21.04	0.07				Spektrum 4	0.877193	40.2961	58.8268		0.398543
Spektrum 5	25.38	56.52	11.9	0.21	0.24	5.77	0				Spektrum 5	16.55	49.1	15.7	0.45	0.7	17.48	0.01				Spektrum 5	1.15894	33.1678	65.6733		0.326542
Spektrum 6	25.07	56.67	11.99	0.21	0.24	5.81	0				Spektrum 6	16.31	49.12	15.79	0.46	0.71	17.59	0.01				Spektrum 6	1.15068	33.1507	65.6986		0.326404
Spektrum 9	25.95	56.16	11.76	0.19	0.27	5.67	0				Spektrum 9	16.98	48.95	15.58	0.42	0.82	17.25	0				Spektrum 9	1.06205	33.2029	65.735		0.325301
Spektrum 10	25.56	56.48	11.83	0.18	0.23	5.72	0.01				Spektrum 10	16.7	49.17	15.65	0.39	0.69	17.37	0.03				Spektrum 10	1.05732	33.1107	65.8319		0.325926
Spektrum 11	25.21	56.69	11.83	0.14	0.25	5.88	0				Spektrum 11	16.41	49.15	15.59	0.3	0.76	17.79	0				Spektrum 11	0.773481	33.8674	65.3591		0.332016
Spektrum 12	25.58	56.7	10.3	0.06	0.22	7.13	0				Spektrum 12	16.36	48.3	13.34	0.13	0.66	21.21	0				Spektrum 12	0.338792	41.502	58.1592		0.409065
Spektrum 13	25.17	56.8	11.73	0.16	0.25	5.89	0				Spektrum 13	16.38	49.25	15.45	0.34	0.75	17.82	0.01				Spektrum 13	0.88741	34.0544	65.0582		0.334279
Spektrum 15	25.51	56.55	11.83	0.19	0.24	5.68	0				Spektrum 15	16.68	49.26	15.66	0.42	0.72	17.26	0				Spektrum 15	1.05909	32.9989	65.942		0.324386
Spektrum 16	25.05	56.78	12	0.25	0.24	5.69	0				Spektrum 16	16.34	49.32	15.84	0.53	0.71	17.26	0				Spektrum 16	1.37514	32.6183	66.0066		0.321651
Area 3	C	O	Mg	Ca	Mn	Fe	Sr				Area 3	C	O	Mg	Ca	Mn	Fe	Sr				Area 3	(Ca,Sr)CO3	(Fe,Mn)CO3	MgCO3		Fe/(Fe+Mg)
Spektrum 20	24.57	57.16	12.09	0.26	0.24	5.68	0				Spektrum 20	16	49.58	15.93	0.56	0.73	17.18	0.01				Spektrum 20	1.4231	32.4028	66.1741		0.31964
Spektrum 21	24.97	56.79	12.16	0.26	0.25	5.56	0				Spektrum 21	16.31	49.41	16.08	0.57	0.74	16.89	0.01				Spektrum 21	1.42622	31.8705	66.7032		0.31377
Spektrum 24	24.7	57.16	11.97	0.22	0.28	5.66	0.02				Spektrum 24	16.09	49.6	15.78	0.47	0.83	17.14	0.08				Spektrum 24	1.32231	32.7273	65.9504		0.321044
Spektrum 25	24.52	57.24	12.1	0.23	0.26	5.64	0.01				Spektrum 25	15.98	49.67	15.96	0.49	0.76	17.08	0.06				Spektrum 25	1.31579	32.3465	66.3377		0.317926
Spektrum 30	24.56	57.06	12.18	0.24	0.26	5.7	0				Spektrum 30	15.97	49.44	16.04	0.53	0.77	17.24	0.01				Spektrum 30	1.30577	32.4266	66.2677		0.318792
Spektrum 31	24.64	57.25	12	0.21	0.25	5.64	0				Spektrum 31	16.07	49.75	15.85	0.45	0.76	17.12	0				Spektrum 31	1.16022	32.5414	66.2983		0.319728
Spektrum 32	25.25	56.83	11.94	0.23	0.25	5.49	0.02				Spektrum 32	16.54	49.59	15.83	0.5	0.74	16.72	0.08				Spektrum 32	1.39431	32.0134	66.5923		0.314974
Spektrum 34	24.75	57.1	11.88	0.18	0.26	5.82	0.01				Spektrum 34	16.09	49.45	15.63	0.39	0.77	17.61	0.05				Spektrum 34	1.04683	33.4986	65.4545		0.328814
Spektrum 39	25.01	56.61	12.18	0.28	0.26	5.66	0				Spektrum 39	16.29	49.12	16.06	0.61	0.77	17.15	0				Spektrum 39	1.52339	32.2089	66.2677		0.317265
Spektrum 41	24.44	57.31	12.12	0.26	0.23	5.61	0.02				Spektrum 41	15.92	49.73	15.99	0.57	0.7	16.99	0.1				Spektrum 41	1.53509	32.0175	66.4474		0.316413
Spektrum 44	25.12	56.74	12.03	0.24	0.25	5.61	0.01				Spektrum 44	16.4	49.35	15.9	0.53	0.74	17.02	0.06				Spektrum 44	1.37817	32.3043	66.3175		0.318027
Area 4	C	O	Mg	Ca	Mn	Fe	Sr				Area 4	C	O	Mg	Ca	Mn	Fe	Sr				Area 4	(Ca,Sr)CO3	(Fe,Mn)CO3	MgCO3		Fe/(Fe+Mg)
Spektrum 54	24.39	57.42	12.01	0.23	0.25	5.69	0.01				Spektrum 54	15.88	49.79	15.83	0.51	0.75	17.21	0.03				Spektrum 54	1.31941	32.6553	66.0253		0.321469
Spektrum 62	24.17	57.4	12.21	0.21	0.27	5.74	0				Spektrum 62	15.7	49.65	16.05	0.45	0.81	17.35	0				Spektrum 62	1.13945	32.6099	66.2507		0.319777
Spektrum 63	24.44	57.24	12.31	0.26	0.28	5.47	0				Spektrum 63	15.95	49.78	16.26	0.57	0.82	16.6	0.01				Spektrum 63	1.41921	31.3865	67.1943		0.307649
Spektrum 65	24.32	57.2	12.34	0.28	0.27	5.6	0				Spektrum 65	15.82	49.57	16.25	0.6	0.79	16.95	0.01				Spektrum 65	1.51433	31.7469	66.7388		0.312152
Spektrum 66	23.34	58.09	12.5	0.28	0.26	5.53	0				Spektrum 66	15.17	50.29	16.45	0.61	0.77	16.72	0				Spektrum 66	1.50781	31.1793	67.3129		0.306711
Spektrum 67	23.64	57.83	12.56	0.26	0.24	5.46	0				Spektrum 67	15.41	50.19	16.57	0.57	0.72	16.54	0				Spektrum 67	1.40389	30.7775	67.8186		0.302997
Spektrum 70	25.14	56.51	12.38	0.3	0.27	5.39	0.01				Spektrum 70	16.44	49.25	16.39	0.65	0.8	16.39	0.07				Spektrum 70	1.68937	30.8447	67.4659		0.30332
Spektrum 73	24.59	57.2	12.34	0.22	0.27	5.38	0				Spektrum 73	16.1	49.88	16.36	0.48	0.81	16.38	0.01				Spektrum 73	1.20813	31.0269	67.765		0.303612
Spektrum 75	24.86	56.56	12.47	0.24	0.26	5.59	0.01				Spektrum 75	16.19	49.07	16.44	0.53	0.78	16.94	0.06				Spektrum 75	1.34626	31.5024	67.1513		0.309524
Spektrum 77	24.09	57.38	12.36	0.22	0.26	5.67	0.01				Spektrum 77	15.65	49.66	16.25	0.48	0.78	17.14	0.03				Spektrum 77	1.2419	32.0194	66.7387		0.314476
Spektrum 78	24.01	57.59	12.34	0.25	0.25	5.54	0.02				Spektrum 78	15.64	49.95	16.26	0.55	0.74	16.77	0.09				Spektrum 78	1.46739	31.4674	67.0652		0.309843
Spektrum 83	25.2	56.56	11.18	0.2	0.27	6.57	0.01				Spektrum 83	16.18	48.39	14.54	0.43	0.8	19.61	0.05				Spektrum 83	1.15195	37.5206	61.3275		0.370141
Spektrum 84	25.38	56.49	11.3	0.14	0.25	6.44	0				Spektrum 84	16.36	48.52	14.75	0.31	0.72	19.32	0.02				Spektrum 84	0.772201	36.9002	62.3276		0.363021
Spektrum 85	25.05	56.78	11.39	0.24	0.25	6.3	0				Spektrum 85	16.17	48.82	14.88	0.51	0.72	18.89	0				Spektrum 85	1.32013	36.0286	62.6513		0.356133
Spektrum 86	25.29	56.69	11.06	0.12	0.29	6.53	0.01				Spektrum 86	16.27	48.59	14.4	0.26	0.86	19.55	0.06				Spektrum 86	0.721821	37.8679	61.4103		0.371234
Spektrum 87	25.59	56.59	10.62	0.24	0.25	6.71	0				Spektrum 87	16.45	48.44	13.81	0.52	0.74	20.04	0				Spektrum 87	1.3468	39.0572	59.596		0.38719
Spektrum 89	24.49	57.43	11.79	0.24	0.25	5.8	0				Spektrum 89	15.93	49.74	15.51	0.53	0.75	17.54	0				Spektrum 89	1.32743	33.4624	65.2102		0.329733
Spektrum 90	24.55	57.27	11.37	0.17	0.25	6.38	0				Spektrum 90	15.82	49.13	14.83	0.37	0.73	19.12	0				Spektrum 90	0.935608	36.4887	62.5757		0.359437
Area 5	C	O	Mg	Ca	Mn	Fe	Sr				Area 5	C	O	Mg	Ca	Mn	Fe	Sr				Area 5	(Ca,Sr)CO3	(Fe,Mn)CO3	MgCO3		Fe/(Fe+Mg)
Spektrum 95	23.52	57.85	12.59	0.26	0.26	5.52	0				Spektrum 95	15.29	50.1	16.56	0.56	0.78	16.69	0.01				Spektrum 95	1.3956	31.0252	67.5792		0.304804
Spektrum 96	23.84	57.71	12.44	0.26	0.25	5.49	0				Spektrum 96	15.54	50.09	16.41	0.57	0.75	16.65	0				Spektrum 96	1.40998	31.128	67.462		0.306191
Spektrum 101	24.1	57.51	12.22	0.2	0.27	5.68	0				Spektrum 101	15.67	49.8	16.08	0.44	0.82	17.18	0				Spektrum 101	1.08873	32.3898	66.5215		0.317318
Spektrum 103	24.48	57.04	12.22	0.19	0.25	5.81	0				Spektrum 103	15.89	49.33	16.06	0.42	0.76	17.54	0				Spektrum 103	1.0287	32.81	66.1613		0.322241
Spektrum 104	24.45	56.74	12.62	0.25	0.29	5.65	0				Spektrum 104	15.87	49.07	16.59	0.54	0.87	17.04	0				Spektrum 104	1.32908	31.5789	67.092		0.30925
Spektrum 105	24.08	57.12	12.69	0.25	0.28	5.57	0.01				Spektrum 105	15.64	49.43	16.69	0.53	0.83	16.82	0.05				Spektrum 105	1.38298	31.117	67.5		0.305038
Spektrum 107	23.68	57.93	12.17	0.22	0.26	5.74	0				Spektrum 107	15.37	50.07	15.99	0.48	0.77	17.32	0				Spektrum 107	1.1963	32.6264	66.1773		0.320491
Spektrum 108	24.24	57.58	12.11	0.23	0.26	5.57	0				Spektrum 108	15.81	50.02	15.99	0.5	0.78	16.9	0				Spektrum 108	1.26582	32.0859	66.6483		0.315045
Spektrum 128	23.55	57.88	12.39	0.27	0.27	5.64	0				Spektrum 128	15.28	50.04	16.28	0.58	0.81	17.01	0				Spektrum 128	1.45396	31.8255	66.7205		0.312812
Spektrum 135	24.89	56.86	9.74	0.1	0.32	8.09	0.01				Spektrum 135	15.58	47.4	12.33	0.2	0.9	23.54	0.04				Spektrum 135	0.60241	46.057	53.3406		0.45373
Spektrum 136	24.99	56.68	10.62	0.04	0.26	7.42	0				Spektrum 136	15.84	47.85	13.62	0.08	0.74	21.86	0				Spektrum 136	0.218103	41.8757	57.9062		0.411308
Spektrum 137	24.58	56.98	10.22	0.04	0.26	7.92	0				Spektrum 137	15.43	47.64	12.98	0.08	0.74	23.13	0				Spektrum 137	0.21692	44.3601	55.423		0.436604
Ne-5a-1	Atom%										Ne-5a-1	Weight%										Ne-5a-1	MODAL-COMPOSITIONS (%)
	C	O	Mg	Ca	Mn	Fe	Sr					C	O	Mg	Ca	Mn	Fe	Sr					(Ca,Sr)CO3	(Fe,Mn)CO3	MgCO3		Fe/(Fe+Mg)
Average	24.7045	57.0426	11.8177	0.206792	0.255849	5.96679	0.00415094				Average	16.0168	49.2645	15.517	0.448491	0.759245	17.9708	0.0215094				Average	1.15409	34.1126	64.7333		0.335505
1sd	0.599583	0.443983	0.688645	0.0617595	0.0185751	0.638911	0.00656864				1sd	0.398079	0.656122	1.02494	0.135777	0.0533712	1.72431	0.0287734				1sd	0.33726	3.65487	3.3775
N	53	53	53	53	53	53	53				N	53	53	53	53	53	53	53				N	53	53	53
min	23.34	56.16	9.74	0.04	0.21	5.38	0				min	15.17	47.4	12.33	0.08	0.62	16.38	0				min	0.21692	30.7775	53.3406
max	25.95	58.09	12.69	0.3	0.32	8.09	0.02				max	16.98	50.29	16.69	0.65	0.9	23.54	0.1				max	1.68937	46.057	67.8186
Ne-5b-1	(coated with gold)										Ne-5b-1											Ne-5b-1	MODAL-COMPOSITIONS (%)
	Atom%											Weight %
Area 2	C	O	Mg	Ca	Mn	Fe	Sr				Area 2	C	O	Mg	Ca	Mn	Fe	Sr				Area 2	(Ca,Sr)CO3	(Fe,Mn)CO3	MgCO3		Fe/(Fe+Mg)
Spektrum 10	22.71	58.28	11.96	0.17	0.24	6.65	0				Spektrum 10	14.45	49.41	15.41	0.37	0.69	19.67	0				Spektrum 10	0.893796	36.225	62.8812		0.357335
Spektrum 11	23.27	58.01	11.98	0.2	0.28	6.24	0.01				Spektrum 11	14.93	49.59	15.56	0.44	0.82	18.61	0.05				Spektrum 11	1.12239	34.8477	64.0299		0.342481
Spektrum 12	23.21	58.09	11.56	0.16	0.27	6.7	0.02				Spektrum 12	14.78	49.28	14.9	0.34	0.78	19.83	0.09				Spektrum 12	0.962052	37.2528	61.7851		0.366922
Spektrum 13	22.82	58.23	11.77	0.16	0.27	6.75	0				Spektrum 13	14.5	49.28	15.14	0.34	0.78	19.95	0.02				Spektrum 13	0.844327	37.0449	62.1108		0.364471
Spektrum 14	23.28	58	11.97	0.19	0.24	6.32	0				Spektrum 14	14.93	49.56	15.55	0.4	0.71	18.85	0				Spektrum 14	1.01496	35.0427	63.9423		0.345544
Spektrum 17	22.97	57.99	12.65	0.22	0.26	5.89	0.01				Spektrum 17	14.8	49.76	16.5	0.47	0.77	17.64	0.07				Spektrum 17	1.20862	32.3174	66.474		0.317691
Area 3	C	O	Mg	Ca	Mn	Fe	Sr				Area 3	C	O	Mg	Ca	Mn	Fe	Sr				Area 3	(Ca,Sr)CO3	(Fe,Mn)CO3	MgCO3		Fe/(Fe+Mg)
Spektrum 32	24.14	57	12.46	0.2	0.26	5.92	0.01				Spektrum 32	15.6	49.07	16.3	0.44	0.77	17.78	0.03				Spektrum 32	1.11406	32.7851	66.1008		0.322089
Spektrum 35	23.7	57.34	12.28	0.24	0.29	6.14	0.01				Spektrum 35	15.22	49.07	15.96	0.52	0.85	18.33	0.04				Spektrum 35	1.31857	33.9135	64.7679		0.333333
Spektrum 37	23.65	57.44	12.41	0.28	0.28	5.94	0				Spektrum 37	15.25	49.33	16.2	0.6	0.82	17.8	0				Spektrum 37	1.4807	32.8926	65.6267		0.323706
Spektrum 43	23.6	57.46	12.66	0.27	0.28	5.72	0.01				Spektrum 43	15.26	49.51	16.57	0.58	0.83	17.21	0.03				Spektrum 43	1.47835	31.679	66.8427		0.311208
Spektrum 44	24.1	57.24	12.35	0.11	0.28	5.91	0.01				Spektrum 44	15.59	49.33	16.18	0.24	0.82	17.78	0.07				Spektrum 44	0.643087	33.1726	66.1844		0.323658
Area 4	C	O	Mg	Ca	Mn	Fe	Sr				Area 4	C	O	Mg	Ca	Mn	Fe	Sr				Area 4	(Ca,Sr)CO3	(Fe,Mn)CO3	MgCO3		Fe/(Fe+Mg)
Spektrum 52	23.56	57.75	12.5	0.11	0.28	5.79	0.01				Spektrum 52	15.26	49.82	16.38	0.24	0.82	17.42	0.05				Spektrum 52	0.642055	32.4773	66.8807		0.316566
Spektrum 53	23.51	57.47	12.62	0.06	0.26	6.06	0.02				Spektrum 53	15.13	49.28	16.45	0.13	0.78	18.15	0.08				Spektrum 53	0.42061	33.2282	66.3512		0.324411
Spektrum 55	23.83	57.47	12.27	0.09	0.26	6.08	0				Spektrum 55	15.37	49.39	16.03	0.18	0.78	18.23	0.02				Spektrum 55	0.481283	33.9037	65.615		0.331335
Spektrum 56	23.38	57.64	12.75	0.25	0.24	5.74	0				Spektrum 56	15.12	49.66	16.69	0.53	0.72	17.27	0				Spektrum 56	1.31718	31.5068	67.176		0.310438
Spektrum 57	24.03	56.98	12.37	0.29	0.24	6.07	0.01				Spektrum 57	15.47	48.86	16.11	0.63	0.7	18.18	0.05				Spektrum 57	1.58061	33.2455	65.1739		0.329176
Spektrum 58	23.93	57.28	12.51	0.29	0.28	5.72	0				Spektrum 58	15.5	49.42	16.4	0.62	0.84	17.23	0				Spektrum 58	1.54255	31.9149	66.5426		0.313769
Spektrum 59	23.68	57.47	12.09	0.06	0.25	6.45	0.01				Spektrum 59	15.17	49.04	15.67	0.13	0.72	19.22	0.03				Spektrum 59	0.371156	35.5249	64.1039		0.347896
Spektrum 60	23.78	57.5	12.18	0.1	0.25	6.19	0				Spektrum 60	15.31	49.31	15.87	0.22	0.75	18.54	0				Spektrum 60	0.534188	34.4017	65.0641		0.336962
Spektrum 69	23.25	57.85	12.03	0.09	0.24	6.51	0.02				Spektrum 69	14.85	49.24	15.56	0.2	0.71	19.34	0.1				Spektrum 69	0.582319	35.7332	63.6845		0.351133
Spektrum 70	23.55	57.48	12.35	0.06	0.27	6.28	0				Spektrum 70	15.12	49.15	16.05	0.13	0.81	18.75	0				Spektrum 70	0.316456	34.5464	65.1371		0.337091
Spektrum 71	23.61	57.44	12.1	0.08	0.28	6.49	0				Spektrum 71	15.1	48.94	15.66	0.17	0.81	19.32	0				Spektrum 71	0.422164	35.7256	63.8522		0.349112
Spektrum 73	23.71	57.48	11.97	0.09	0.28	6.47	0.01				Spektrum 73	15.18	49.01	15.51	0.2	0.81	19.27	0.03				Spektrum 73	0.53135	35.8661	63.6026		0.350868
Area 5	C	O	Mg	Ca	Mn	Fe	Sr				Area 5	C	O	Mg	Ca	Mn	Fe	Sr				Area 5	(Ca,Sr)CO3	(Fe,Mn)CO3	MgCO3		Fe/(Fe+Mg)
Spektrum 78	24.7	57.43	11.82	0.25	0.28	5.52	0.01				Spektrum 78	16.15	50.02	15.64	0.54	0.84	16.78	0.03				Spektrum 78	1.45414	32.4385	66.1074		0.318339
Spektrum 79	23.85	57.55	12.27	0.23	0.26	5.85	0				Spektrum 79	15.44	49.63	16.08	0.49	0.76	17.61	0				Spektrum 79	1.23589	32.8318	65.9323		0.322848
Spektrum 82	23.19	58.04	12.27	0.24	0.27	5.97	0.01				Spektrum 82	14.94	49.8	16	0.52	0.8	17.89	0.05				Spektrum 82	1.33262	33.2623	65.4051		0.327303
Spektrum 83	23.42	58.03	12.07	0.22	0.29	5.97	0				Spektrum 83	15.11	49.88	15.77	0.47	0.85	17.92	0				Spektrum 83	1.18598	33.7466	65.0674		0.330931
Spektrum 88	24.47	57.21	12.14	0.23	0.26	5.69	0				Spektrum 88	15.93	49.59	15.99	0.51	0.79	17.2	0				Spektrum 88	1.25546	32.4782	66.2664		0.319125
Spektrum 89	25.03	56.94	11.69	0.07	0.24	6.03	0				Spektrum 89	16.27	49.28	15.38	0.15	0.71	18.21	0				Spektrum 89	0.388242	34.7754	64.8364		0.340293
Area 6	C	O	Mg	Ca	Mn	Fe	Sr				Area 6	C	O	Mg	Ca	Mn	Fe	Sr				Area 6	(Ca,Sr)CO3	(Fe,Mn)CO3	MgCO3		Fe/(Fe+Mg)
Spektrum 102	24.15	57.24	12.39	0.25	0.28	5.68	0.01				Spektrum 102	15.68	49.5	16.27	0.53	0.84	17.13	0.05				Spektrum 102	1.3971	32.0258	66.5771		0.314333
Spektrum 103	24.52	56.9	12.26	0.18	0.29	5.85	0				Spektrum 103	15.89	49.12	16.08	0.4	0.87	17.64	0.01				Spektrum 103	0.968784	33.0463	65.9849		0.323026
Spektrum 104	24.19	57.35	12.09	0.21	0.26	5.89	0				Spektrum 104	15.67	49.49	15.85	0.46	0.78	17.73	0				Spektrum 104	1.13821	33.3333	65.5285		0.327586
Spektrum 105	24.21	57.55	12.15	0.22	0.26	5.61	0				Spektrum 105	15.78	49.95	16.03	0.48	0.77	17	0				Spektrum 105	1.20614	32.182	66.6118		0.315878
Spektrum 106	23.91	57.53	12.25	0.22	0.27	5.81	0.01				Spektrum 106	15.49	49.63	16.05	0.48	0.81	17.48	0.06				Spektrum 106	1.23922	32.7586	66.0022		0.321705
Spektrum 107	24.32	57.18	12.16	0.27	0.28	5.78	0				Spektrum 107	15.77	49.4	15.96	0.58	0.83	17.43	0.01				Spektrum 107	1.46025	32.7745	65.7653		0.322185
Spektrum 108	23.86	57.55	12.35	0.25	0.26	5.71	0.01				Spektrum 108	15.47	49.71	16.21	0.55	0.78	17.22	0.05				Spektrum 108	1.39935	32.1313	66.4693		0.316168
Spektrum 109	24.45	57.28	12.1	0.22	0.24	5.72	0				Spektrum 109	15.91	49.67	15.94	0.48	0.71	17.3	0				Spektrum 109	1.2035	32.6039	66.1926		0.320988
Spektrum 110	23.59	57.67	12.54	0.24	0.25	5.71	0				Spektrum 110	15.29	49.79	16.45	0.52	0.73	17.22	0				Spektrum 110	1.28068	31.8036	66.9157		0.312877
Area 8	C	O	Mg	Ca	Mn	Fe	Sr				Area 8	C	O	Mg	Ca	Mn	Fe	Sr				Area 8	(Ca,Sr)CO3	(Fe,Mn)CO3	MgCO3		Fe/(Fe+Mg)
Spektrum 128	23.84	57.42	12.6	0.23	0.23	5.68	0				Spektrum 128	15.47	49.64	16.55	0.5	0.68	17.15	0				Spektrum 128	1.22732	31.5368	67.2359		0.310722
Spektrum 129	23.62	57.81	12.3	0.21	0.26	5.77	0.02				Spektrum 129	15.3	49.88	16.13	0.46	0.76	17.38	0.1				Spektrum 129	1.23922	32.4892	66.2716		0.319314
Spektrum 130	24.23	57.33	12.49	0.2	0.24	5.52	0				Spektrum 130	15.8	49.81	16.49	0.44	0.7	16.73	0.02				Spektrum 130	1.08401	31.2195	67.6965		0.306496
Spektrum 131	23.84	57.35	12.53	0.2	0.24	5.84	0				Spektrum 131	15.43	49.45	16.42	0.43	0.7	17.57	0				Spektrum 131	1.06326	32.3232	66.6135		0.31791
Spektrum 132	23.35	57.61	12.78	0.24	0.26	5.76	0				Spektrum 132	15.09	49.6	16.73	0.52	0.76	17.3	0				Spektrum 132	1.2605	31.6176	67.1218		0.31068
Spektrum 133	23.1	57.95	12.55	0.22	0.25	5.93	0				Spektrum 133	14.89	49.76	16.37	0.47	0.73	17.78	0				Spektrum 133	1.16095	32.6121	66.2269		0.320887
Spektrum 134	23.9	57.69	12.48	0.25	0.24	5.45	0				Spektrum 134	15.59	50.14	16.48	0.54	0.71	16.54	0				Spektrum 134	1.35722	30.8903	67.7524		0.30396
Ne-5b-1	Atom%										Ne-5b-1	Weight%										Ne-5b-1	MODAL-COMPOSITIONS (%)
	C	O	Mg	Ca	Mn	Fe	Sr					C	O	Mg	Ca	Mn	Fe	Sr					(Ca,Sr)CO3	(Fe,Mn)CO3	MgCO3		Fe/(Fe+Mg)
Average	23.7558	57.5444	12.2682	0.191556	0.262	5.97267	0.00511111				Average	15.3389	49.49	16.0338	0.414222	0.773333	17.924	0.0253333				Average	1.05246	33.3362	65.6113		0.327433
1sd	0.486879	0.334913	0.277523	0.0684091	0.0168127	0.323896	0.00653953				1sd	0.396424	0.300459	0.411541	0.147671	0.0513377	0.85657	0.0303754				1sd	0.362189	1.56386	1.37355
N	45	45	45	45	45	45	45				N	45	45	45	45	45	45	45				N	45	45	45
min	22.71	56.9	11.56	0.06	0.23	5.45	0				min	14.45	48.86	14.9	0.13	0.68	16.54	0				min	0.316456	30.8903	61.7851
max	25.03	58.28	12.78	0.29	0.29	6.75	0.02				max	16.27	50.14	16.73	0.63	0.87	19.95	0.1				max	1.58061	37.2528	67.7524

## Sheet: Siderite
Ne-3b											Ne-3b											Ne-3b	MODAL-COMPOSITIONS (%)
Atom %											Weight %
Area 7		O	Mg	Ca	Mn	Fe	Sr				Area 7		O	Mg	Ca	Mn	Fe	Sr				Area 7	(Ca,Sr)CO3	(Fe,Mn)CO3	MgCO3		Fe/(Fe+Mg)
Siderit 1		68.24	14.67	0.06	0.68	16.35	0				Siderit 1		45.47	14.85	0.1	1.56	38.03	0				Siderit 1	0.188917	53.6209	46.1902		0.527079
Siderit 2		69.1	12.94	0.07	0.7	17.18	0.01				Siderit 2		45.65	13	0.12	1.58	39.62	0.04				Siderit 2	0.2589	57.8641	41.877		0.570385
Siderit 3		69.19	12.73	0.17	0.66	17.26	0				Siderit 3		45.68	12.77	0.28	1.49	39.78	0				Siderit 3	0.55159	58.1441	41.3043		0.575525
Siderit 4		68.93	15.67	0.17	0.56	14.66	0.01				Siderit 4		47.1	16.27	0.29	1.32	34.97	0.06				Siderit 4	0.579337	48.9862	50.4345		0.48335		(actually Fe-rich magnesite)
Siderit 5		68.9	13.23	0.13	0.79	16.94	0.02				Siderit 5		45.56	13.29	0.21	1.78	39.09	0.07				Siderit 5	0.48216	56.9913	42.5265		0.561485
Ne-3b		Atom%									Ne-3b		Weight%									Ne-3b	MODAL-COMPOSITIONS (%)
		O	Mg	Ca	Mn	Fe	Sr						O	Mg	Ca	Mn	Fe	Sr					(Ca,Sr)CO3	(Fe,Mn)CO3	MgCO3		Fe/(Fe+Mg)
Average		68.872	13.848	0.12	0.678	16.478	0.008				Average		45.892	14.036	0.2	1.546	38.298	0.034				Average	0.412181	55.1213	44.4665		0.543362
1sd		0.33367	1.13593	0.0473286	0.0738647	0.963253	0.00748331				1sd		0.608454	1.33311	0.0787401	0.14854	1.77306	0.0293939				1sd	0.158502	3.46549	3.43675
N		5	5	5	5	5	5				N		5	5	5	5	5	5				N	5	5	5
min		68.24	12.73	0.06	0.56	14.66	0				min		45.47	12.77	0.1	1.32	34.97	0				min	0.188917	48.9862	41.3043
max		69.19	15.67	0.17	0.79	17.26	0.02				max		47.1	16.27	0.29	1.78	39.78	0.07				max	0.579337	58.1441	50.4345
Ne-4											Ne-4											Ne-4	MODAL-COMPOSITIONS (%)
Atom %											Weight %
Area 2		O	Mg	Ca	Mn	Fe	Sr				Area 2		O	Mg	Ca	Mn	Fe	Sr				Area 2	(Ca,Sr)CO3	(Fe,Mn)CO3	MgCO3		Fe/(Fe+Mg)
Spektrum 25		67.68	16.88	0.14	0.33	14.97	0				Spektrum 25		46.01	17.44	0.24	0.77	35.54	0				Spektrum 25	0.433168	47.3391	52.2277		0.470016		(actually Fe-rich magnesite)
Spektrum 26		68.29	16.65	0.14	0.35	14.55	0.03				Spektrum 26		46.75	17.32	0.24	0.82	34.77	0.1				Spektrum 26	0.535939	46.9735	52.4905		0.466346		(actually Fe-rich magnesite)
Spektrum 27		68.01	18.12	0.09	0.34	13.43	0.02				Spektrum 27		47.26	19.13	0.16	0.81	32.57	0.07				Spektrum 27	0.34375	43.0312	56.625		0.425674		(actually Fe-rich magnesite)
Spektrum 28		68.18	17.31	0.12	0.34	14.05	0				Spektrum 28		47.03	18.14	0.2	0.81	33.82	0				Spektrum 28	0.377121	45.2231	54.3997		0.448023		(actually Fe-rich magnesite)
Spektrum 29		68.04	19.17	0.09	0.41	12.28	0.01				Spektrum 29		48.01	20.56	0.15	1	30.24	0.03				Spektrum 29	0.312891	39.7059	59.9812		0.390461		(actually Fe-rich magnesite)
Spektrum 35		67.9	19.52	0.08	0.39	12.11	0				Spektrum 35		48.03	20.98	0.15	0.95	29.89	0				Spektrum 35	0.249221	38.9408	60.81		0.382864		(actually Fe-rich magnesite)
Spektrum 36		67.9	19.48	0.1	0.41	12.1	0				Spektrum 36		48.01	20.93	0.18	1	29.86	0.02				Spektrum 36	0.311624	38.9841	60.7043		0.383154		(actually Fe-rich magnesite)
Ne-4											Ne-4											Ne-4	MODAL-COMPOSITIONS (%)
Atom %											Weight %
Area 3		O	Mg	Ca	Mn	Fe	Sr				Area 3		O	Mg	Ca	Mn	Fe	Sr				Area 3	(Ca,Sr)CO3	(Fe,Mn)CO3	MgCO3		Fe/(Fe+Mg)
Siderit 1		67.98	19.37	0.11	0.43	12.12	0				Siderit 1		48.06	20.8	0.19	1.04	29.9	0				Siderit 1	0.343428	39.182	60.4746		0.384884		(actually Fe-rich magnesite)
Siderit 2		68.08	19.38	0.12	0.4	12.04	0				Siderit 2		48.22	20.85	0.21	0.96	29.76	0				Siderit 2	0.375704	38.948	60.6763		0.383195		(actually Fe-rich magnesite)
Siderit 3		67.76	19.41	0.12	0.44	12.27	0				Siderit 3		47.75	20.79	0.2	1.06	30.18	0.02				Siderit 3	0.372208	39.4231	60.2047		0.387311		(actually Fe-rich magnesite)
Siderit 4		67.68	19.32	0.21	0.47	12.3	0.02				Siderit 4		47.59	20.64	0.37	1.14	30.2	0.06				Siderit 4	0.711634	39.5111	59.7772		0.388994		(actually Fe-rich magnesite)
Siderit 5		68.85	14.45	0.27	0.71	15.71	0				Siderit 5		46.27	14.76	0.45	1.65	36.87	0				Siderit 5	0.867052	52.7296	46.4033		0.520889
Siderit 6		68.12	17.47	0.03	0.42	13.94	0.02				Siderit 6		46.99	18.32	0.06	0.98	33.57	0.09				Siderit 6	0.156838	45.0439	54.7992		0.443808		(actually Fe-rich magnesite)
Siderit 7		68.85	12.65	0.06	0.34	18.1	0				Siderit 7		45.12	12.6	0.1	0.76	41.4	0.01				Siderit 7	0.192616	59.1974	40.61		0.588618
Ne-4											Ne-4											Ne-4	MODAL-COMPOSITIONS (%)
Atom %											Weight %
Area 5		O	Mg	Ca	Mn	Fe	Sr				Area 5		O	Mg	Ca	Mn	Fe	Sr				Area 5	(Ca,Sr)CO3	(Fe,Mn)CO3	MgCO3		Fe/(Fe+Mg)
Siderit 1		67.73	20.05	0.16	0.41	11.64	0.01				Siderit 1		41.18	18.53	0.24	0.86	24.71	0.02				Siderit 1	0.526805	37.3412	62.132		0.367308		(actually Fe-rich magnesite)
Siderit 2		67.79	19.93	0.13	0.42	11.72	0				Siderit 2		41.28	18.44	0.2	0.88	24.92	0.01				Siderit 2	0.403727	37.7019	61.8944		0.3703		(actually Fe-rich magnesite)
Siderit 3		67.57	19.55	0.09	0.4	12.38	0.01				Siderit 3		41.01	18.03	0.14	0.83	26.22	0.03				Siderit 3	0.308356	39.408	60.2837		0.387723		(actually Fe-rich magnesite)
Siderit 4		67.82	20.49	0.17	0.42	11.09	0.01				Siderit 4		41.62	19.11	0.26	0.89	23.76	0.03				Siderit 4	0.559354	35.7676	63.6731		0.351172		(actually Fe-rich magnesite)
Siderit 5		67.67	20.49	0.12	0.45	11.26	0.01				Siderit 5		41.39	19.05	0.19	0.94	24.05	0.03				Siderit 5	0.402103	36.2202	63.3777		0.354646		(actually Fe-rich magnesite)
Siderit 6		67.73	20.12	0.14	0.45	11.54	0.01				Siderit 6		41.55	18.76	0.22	0.94	24.72	0.03				Siderit 6	0.464972	37.1668	62.3683		0.364498		(actually Fe-rich magnesite)
Siderit 7		67.74	18.71	0.09	0.39	13.06	0				Siderit 7		41.01	17.21	0.14	0.82	27.61	0				Siderit 7	0.27907	41.7054	58.0155		0.41108		(actually Fe-rich magnesite)
Siderit 8		67.75	18.72	0.11	0.39	13.01	0.01				Siderit 8		41	17.22	0.16	0.82	27.48	0.05				Siderit 8	0.372208	41.5633	58.0645		0.410022		(actually Fe-rich magnesite)
Siderit 9		67.49	20.23	0.16	0.45	11.66	0				Siderit 9		41.48	18.89	0.24	0.95	25.02	0.01				Siderit 9	0.492308	37.2615	62.2462		0.365632		(actually Fe-rich magnesite)
Ne-4		Atom%									Ne-4		Atom%									Ne-4	MODAL-COMPOSITIONS (%)
		O	Mg	Ca	Mn	Fe	Sr						O	Mg	Ca	Mn	Fe	Sr					(Ca,Sr)CO3	(Fe,Mn)CO3	MgCO3		Fe/(Fe+Mg)
Average		67.9396	18.5857	0.123913	0.415652	12.9274	0.00695652				Average		44.8965	18.6304	0.203913	0.942609	29.8722	0.0265217				Average	0.408352	41.6682	57.9234		0.410224
1sd		0.341932	1.90863	0.0487887	0.0738286	1.62862	0.00856422				1sd		2.9853	2.00909	0.0799858	0.179449	4.52797	0.0286825				1sd	0.156007	5.52208	5.52325
N		23	23	23	23	23	23				N		23	23	23	23	23	23				N	23	23	23
min		67.49	12.65	0.03	0.33	11.09	0				min		41	12.6	0.06	0.76	23.76	0				min	0.156838	35.7676	40.61
max		68.85	20.49	0.27	0.71	18.1	0.03				max		48.22	20.98	0.45	1.65	41.4	0.1				max	0.867052	59.1974	63.6731
Ne-5		Profile across siderite and pseudomorphs									Ne-5		Profile across siderite and pseudomorphs									Ne-5	MODAL-COMPOSITIONS (%)
Atom %											Weight %
Area 4		O	Mg	Ca	Mn	Fe	Sr				Area 4		O	Mg	Ca	Mn	Fe	Sr				Area 4	(Ca,Sr)CO3	(Fe,Mn)CO3	MgCO3		Fe/(Fe+Mg)
# 36 (pseudomorph)		68.68	17.46	0.23	0.44	13.18	0.01				# 36 (pseudomorph)		47.91	18.51	0.4	1.05	32.09	0.04				# 36 (pseudomorph)	0.766284	43.4866	55.7471		0.430157
# 37 (pseudomorph)		68.46	18.39	0.21	0.45	12.48	0.01				# 37 (pseudomorph)		48.18	19.67	0.37	1.09	30.66	0.03				# 37 (pseudomorph)	0.697527	40.9956	58.3069		0.404276
# 38		69.4	10.89	0.16	0.7	18.85	0				# 38		44.9	10.7	0.26	1.56	42.56	0.02				# 38	0.522876	63.8889	35.5882		0.633826
# 39		69.16	12.05	0.13	0.87	17.79	0				# 39		45.24	11.98	0.22	1.95	40.62	0				# 39	0.42153	60.5058	39.0726		0.59618
# 40		69.17	11.55	0.1	0.7	18.48	0.01				# 40		44.95	11.4	0.16	1.56	41.91	0.02				# 40	0.35668	62.192	37.4514		0.615385
# 41		68.99	12.63	0.09	0.72	17.57	0				# 41		45.33	12.61	0.14	1.62	40.3	0				# 41	0.290229	58.981	40.7288		0.581788
# 42		69.22	11.67	0.1	0.8	18.22	0				# 42		45.09	11.55	0.16	1.78	41.42	0				# 42	0.324781	61.7733	37.9019		0.609568
# 43		69.11	11.59	0.11	0.76	18.42	0.01				# 43		44.88	11.44	0.18	1.7	41.75	0.05				# 43	0.388475	62.0913	37.5202		0.613795
# 44		69	12.93	0.07	0.67	17.31	0.01				# 44		45.5	12.95	0.12	1.52	39.86	0.05				# 44	0.258148	58.0187	41.7231		0.572421
# 45		69.01	12.74	0.09	0.71	17.44	0				# 45		45.42	12.74	0.15	1.6	40.07	0.01				# 45	0.29051	58.5862	41.1233		0.577866
# 46		69.09	11.99	0.12	0.74	18.06	0				# 46		45.09	11.89	0.2	1.66	41.16	0				# 46	0.388224	60.8217	38.79		0.600998
# 47		69	12.63	0.13	0.84	17.39	0				# 47		45.36	12.62	0.22	1.89	39.9	0.01				# 47	0.41949	58.8254	40.7551		0.57928
# 48		69.27	11.56	0.15	0.79	18.21	0.01				# 48		45.11	11.44	0.25	1.77	41.39	0.04				# 48	0.520833	61.849	37.6302		0.61169
Ne-5											Ne-5											Ne-5	MODAL-COMPOSITIONS (%)
Atom %											Weight %
Area 6		O	Mg	Ca	Mn	Fe	Sr				Area 6		O	Mg	Ca	Mn	Fe	Sr				Area 6	(Ca,Sr)CO3	(Fe,Mn)CO3	MgCO3		Fe/(Fe+Mg)
Spektrum 70		68.43	16.35	0.08	0.29	14.84	0				Spektrum 70		46.77	16.98	0.14	0.68	35.4	0.02				Sd 1	0.253485	47.9404	51.8061		0.475794
Spektrum 71		68.56	14.1	0.06	0.4	16.88	0.01				Spektrum 71		45.57	14.24	0.09	0.91	39.17	0.03				Sd 2	0.222576	54.9444	44.8331		0.544868
Spektrum 72		68.49	14.33	0.09	0.47	16.62	0				Spektrum 72		45.63	14.51	0.15	1.07	38.64	0				Sd 3	0.285624	54.2368	45.4776		0.536995
Spektrum 73		69.3	8.01	0.06	0.23	22.39	0.01				Spektrum 73		43.15	7.58	0.1	0.49	48.67	0.02				Sd 4	0.228013	73.6808	26.0912		0.736513
Spektrum 74		69.56	6.22	0.18	0.15	23.88	0				Spektrum 74		42.58	5.79	0.28	0.31	51.02	0.01				Sd 5	0.591522	78.9681	20.4404		0.793355
Ne-5		Atom%									Ne-5		Weight%									Ne-5	MODAL-COMPOSITIONS (%)
		O	Mg	Ca	Mn	Fe	Sr						O	Mg	Ca	Mn	Fe	Sr					(Ca,Sr)CO3	(Fe,Mn)CO3	MgCO3		Fe/(Fe+Mg)
Average		69.0475	11.9525	0.1075	0.615	18.2719	0.00375				Average		45.0356	11.9012	0.17625	1.37937	41.49	0.0175				Average	0.360187	61.0815	38.5583		0.604541
1sd		0.306421	2.26616	0.034187	0.222486	2.06798	0.00484123				1sd		0.931766	2.4895	0.0550993	0.500768	3.56943	0.0167705				1sd	0.10881	6.94886	7.00584
N		16	16	16	16	16	16				N		16	16	16	16	16	16				N	16	16	16
min		68.43	6.22	0.06	0.15	14.84	0				min		42.58	5.79	0.09	0.31	35.4	0				min	0.222576	47.9404	20.4404
max		69.56	16.35	0.18	0.87	23.88	0.01				max		46.77	16.98	0.28	1.95	51.02	0.05				max	0.591522	78.9681	51.8061
NE-5a-1	(coated with gold)										NE-5a-1											Ne-5a-1	MODAL-COMPOSITIONS (%)
	Atom%											Weight%
Area 3	C	O	Mg	Ca	Mn	Fe	Sr				Area 3	C	O	Mg	Ca	Mn	Fe	Sr				Area 3	(Ca,Sr)CO3	(Fe,Mn)CO3	MgCO3		Fe/(Fe+Mg)
Spektrum 17	24.95	57.16	9.41	0.06	0.26	8.17	0				Spektrum 17	15.64	47.74	11.94	0.12	0.73	23.82	0				Spektrum 17	0.335196	47.095	52.5698		0.464733		(actually Fe-rich magnesite)
Spektrum 18	25.03	57.13	9.48	0.05	0.19	8.11	0.01				Spektrum 18	15.73	47.82	12.06	0.11	0.56	23.7	0.03				Spektrum 18	0.336323	46.5247	53.139		0.461057		(actually Fe-rich magnesite)
Spektrum 47	24.93	57.32	9.21	0.06	0.22	8.25	0				Spektrum 47	15.63	47.87	11.69	0.13	0.64	24.04	0				Spektrum 47	0.338219	47.7452	51.9166		0.472509		(actually Fe-rich magnesite)
Area 4		O	Mg	Ca	Mn	Fe	Sr				Area 4		O	Mg	Ca	Mn	Fe	Sr				Area 4	(Ca,Sr)CO3	(Fe,Mn)CO3	MgCO3
Spektrum 59	24.6	57.45	8.79	0.14	0.22	8.78	0.02				Spektrum 59	15.25	47.43	11.03	0.29	0.63	25.29	0.07				Spektrum 59	0.891365	50.1393	48.9694		0.499715
Spektrum 60	24.61	57.54	8.05	0.1	0.34	9.35	0.01				Spektrum 60	15.1	47.04	10	0.2	0.96	26.67	0.03				Spektrum 60	0.616246	54.2857	45.098		0.537356
NE-5a-1	Atom%										NE-5a-1	Weight%										NE-5a-1	MODAL-COMPOSITIONS (%)
	C	O	Mg	Ca	Mn	Fe	Sr					C	O	Mg	Ca	Mn	Fe	Sr					(Ca,Sr)CO3	(Fe,Mn)CO3	MgCO3		Fe/(Fe+Mg)
Average	24.824	57.32	8.988	0.082	0.246	8.532	0.008				Average	15.47	47.58	11.344	0.17	0.704	24.704	0.026				Average	0.50347	49.158	50.3386		0.486986
1sd	0.181945	0.159374	0.526969	0.0337046	0.052	0.473134	0.00748331				1sd	0.247952	0.31029	0.760595	0.0678233	0.138939	1.13481	0.0257682				1sd	0.222146	2.84404	2.98828
N	5	5	5	5	5	5	5				N	5	5	5	5	5	5	5				N	5	5	5
min	24.6	57.13	8.05	0.05	0.19	8.11	0				min	15.1	47.04	10	0.11	0.56	23.7	0				min	0.335196	46.5247	45.098
max	25.03	57.54	9.48	0.14	0.34	9.35	0.02				max	15.73	47.87	12.06	0.29	0.96	26.67	0.07				max	0.891365	54.2857	53.139
Ne-5b-1	(coated with gold)										Ne-5b-1											Ne-5b-1	MODAL-COMPOSITIONS (%)
	Atom%											Weight %
Area 2	C	O	Mg	Ca	Mn	Fe	Sr				Area 2	C	O	Mg	Ca	Mn	Fe	Sr				Area 2	(Ca,Sr)CO3	(Fe,Mn)CO3	MgCO3		Fe/(Fe+Mg)
Spektrum 1	23.92	57.61	6.96	0.12	0.53	10.83	0.03				Spektrum 1	14.23	45.64	8.38	0.24	1.44	29.95	0.12				Spektrum 1	0.812128	61.5051	37.6827		0.608769
Spektrum 2	24.2	57.33	7.53	0.12	0.41	10.4	0				Spektrum 2	14.54	45.87	9.16	0.24	1.13	29.06	0				Spektrum 2	0.650054	58.559	40.7909		0.580033
Spektrum 3	24	57.56	7.46	0.07	0.41	10.49	0.01				Spektrum 3	14.39	45.99	9.06	0.15	1.12	29.26	0.02				Spektrum 3	0.433839	59.1106	40.4555		0.584401
Spektrum 4	24.14	57.48	7.3	0.11	0.51	10.46	0				Spektrum 4	14.47	45.9	8.86	0.22	1.39	29.16	0				Spektrum 4	0.598477	59.6844	39.7171		0.588964
Spektrum 5	24.38	57.24	6.81	0.08	0.5	10.98	0				Spektrum 5	14.51	45.38	8.2	0.16	1.37	30.37	0.01				Spektrum 5	0.435493	62.4932	37.0713		0.617201
Spektrum 6	24.48	57.27	6.76	0.08	0.44	10.97	0				Spektrum 6	14.59	45.48	8.16	0.16	1.2	30.41	0				Spektrum 6	0.438356	62.5205	37.0411		0.618725
Spektrum 7	23.9	57.75	7.23	0.05	0.42	10.64	0.02				Spektrum 7	14.3	46.02	8.75	0.1	1.15	29.61	0.07				Spektrum 7	0.381264	60.2397	39.3791		0.595411
Spektrum 8	23.03	58.27	7.26	0.07	0.44	10.94	0				Spektrum 8	13.68	46.09	8.72	0.13	1.18	30.19	0				Spektrum 8	0.374131	60.8231	38.8028		0.601099
Spektrum 9	23.67	58.04	7.5	0.05	0.4	10.32	0.02				Spektrum 9	14.24	46.49	9.13	0.1	1.1	28.87	0.08				Spektrum 9	0.382723	58.6113	41.006		0.579125
Area 3	C	O	Mg	Ca	Mn	Fe	Sr				Area 3	C	O	Mg	Ca	Mn	Fe	Sr				Area 3	(Ca,Sr)CO3	(Fe,Mn)CO3	MgCO3		Fe/(Fe+Mg)
Spektrum 24	24.05	57.69	6.29	0.17	0.45	11.34	0				Spektrum 24	14.23	45.47	7.54	0.33	1.22	31.21	0				Spektrum 24	0.931507	64.6027	34.4658		0.643222
Spektrum 25	24.16	57.72	7.04	0.12	0.4	10.57	0				Spektrum 25	14.5	46.14	8.55	0.24	1.09	29.49	0				Spektrum 25	0.661886	60.5074	38.8307		0.600227
Spektrum 26	23.95	57.71	6.73	0.15	0.44	11.01	0.02				Spektrum 26	14.23	45.69	8.1	0.29	1.2	30.42	0.07				Spektrum 26	0.926431	62.3978	36.6757		0.620631
Spektrum 27	23.85	57.65	7.17	0.1	0.43	10.79	0				Spektrum 27	14.23	45.81	8.66	0.2	1.18	29.92	0				Spektrum 27	0.540833	60.6814	38.7777		0.60078
Spektrum 28	24.55	57.45	6.59	0.05	0.48	10.89	0				Spektrum 28	14.67	45.72	7.97	0.09	1.31	30.24	0				Spektrum 28	0.277624	63.1316	36.5908		0.622998
Spektrum 29	24.13	57.81	6.96	0.08	0.5	10.49	0.02				Spektrum 29	14.47	46.17	8.45	0.17	1.38	29.26	0.1				Spektrum 29	0.554017	60.8864	38.5596		0.601146
Spektrum 30	23.88	57.76	6.9	0.21	0.47	10.79	0				Spektrum 30	14.23	45.86	8.32	0.41	1.27	29.9	0.01				Spektrum 30	1.14317	61.2956	37.5612		0.609949
Area 4	C	O	Mg	Ca	Mn	Fe	Sr				Area 4	C	O	Mg	Ca	Mn	Fe	Sr				Area 4	(Ca,Sr)CO3	(Fe,Mn)CO3	MgCO3		Fe/(Fe+Mg)
Spektrum 45	23.65	57.83	8.46	0.08	0.34	9.65	0				Spektrum 45	14.38	46.83	10.41	0.16	0.95	27.27	0				Spektrum 45	0.431732	53.9126	45.6557		0.532855
Spektrum 46	24.46	57.37	7.79	0.06	0.33	9.98	0.01				Spektrum 46	14.84	46.36	9.56	0.13	0.92	28.15	0.05				Spektrum 46	0.38525	56.7419	42.8729		0.561621
Spektrum 47	24.12	57.56	7.04	0.09	0.43	10.76	0				Spektrum 47	14.41	45.8	8.52	0.19	1.16	29.9	0.02				Spektrum 47	0.491266	61.0808	38.4279		0.604494
Spektrum 48	24.15	57.6	7.6	0.12	0.42	10.11	0.01				Spektrum 48	14.58	46.32	9.29	0.24	1.15	28.37	0.05				Spektrum 48	0.711939	57.667	41.621		0.570864
Spektrum 49	24.64	57.26	7.25	0.07	0.36	10.43	0				Spektrum 49	14.84	45.96	8.84	0.14	1	29.22	0				Spektrum 49	0.386527	59.5803	40.0331		0.589932
Spektrum 50	24.11	57.44	6.46	0.09	0.43	11.46	0				Spektrum 50	14.25	45.21	7.73	0.19	1.15	31.48	0				Spektrum 50	0.488069	64.4794	35.0325		0.639509
Spektrum 51	24.52	57.39	7.24	0.12	0.45	10.27	0				Spektrum 51	14.78	46.09	8.83	0.24	1.25	28.79	0				Spektrum 51	0.663717	59.292	40.0442		0.586522
Spektrum 54	24.38	57.3	6.92	0.08	0.48	10.84	0.01				Spektrum 54	14.54	45.54	8.36	0.15	1.32	30.06	0.03				Spektrum 54	0.490998	61.7567	37.7523		0.61036
Area 5	C	O	Mg	Ca	Mn	Fe	Sr				Area 5	C	O	Mg	Ca	Mn	Fe	Sr				Area 5	(Ca,Sr)CO3	(Fe,Mn)CO3	MgCO3		Fe/(Fe+Mg)
Spektrum 74	24.17	58	7.15	0.09	0.38	10.21	0.01				Spektrum 74	14.6	46.69	8.74	0.17	1.05	28.7	0.04				Spektrum 74	0.560538	59.361	40.0785		0.588134
Spektrum 75	24.07	57.87	7.41	0.07	0.44	10.13	0.01				Spektrum 75	14.54	46.56	9.06	0.14	1.22	28.46	0.02				Spektrum 75	0.442968	58.5271	41.0299		0.577537
Spektrum 76	24.11	57.84	7.04	0.06	0.44	10.5	0.01				Spektrum 76	14.48	46.28	8.56	0.12	1.21	29.32	0.03				Spektrum 76	0.387812	60.6094	39.0028		0.598632
Spektrum 77	23.49	58.25	7.33	0.08	0.49	10.35	0.01				Spektrum 77	14.1	46.56	8.9	0.17	1.34	28.89	0.05				Spektrum 77	0.492881	59.3647	40.1424		0.585407
Area 6	C	O	Mg	Ca	Mn	Fe	Sr				Area 6	C	O	Mg	Ca	Mn	Fe	Sr				Area 6	(Ca,Sr)CO3	(Fe,Mn)CO3	MgCO3		Fe/(Fe+Mg)
Spektrum 90	24.61	57.26	7.5	0.02	0.39	10.21	0.02				Spektrum 90	14.87	46.09	9.17	0.04	1.07	28.68	0.07				Spektrum 90	0.220507	58.4344	41.3451		0.57651
Spektrum 91	24.69	57.54	7.06	0.04	0.41	10.26	0				Spektrum 91	14.93	46.35	8.64	0.09	1.12	28.86	0				Spektrum 91	0.225098	60.045	39.7299		0.592379
Spektrum 92	24.85	57.19	8.06	0.05	0.39	9.43	0.01				Spektrum 92	15.22	46.66	10	0.11	1.1	26.85	0.06				Spektrum 92	0.334448	54.738	44.9275		0.539165
Spektrum 93	25.13	57.11	7.59	0.05	0.42	9.71	0				Spektrum 93	15.34	46.45	9.38	0.1	1.17	27.56	0				Spektrum 93	0.281373	57.0062	42.7124		0.561272
Spektrum 94	24.75	57.21	7.95	0.05	0.38	9.64	0.02				Spektrum 94	15.1	46.48	9.82	0.1	1.05	27.34	0.1				Spektrum 94	0.388027	55.5432	44.0687		0.548039
Spektrum 95	25.2	57.01	7	0.05	0.39	10.33	0.01				Spektrum 95	15.24	45.93	8.57	0.11	1.07	29.03	0.05				Spektrum 95	0.337458	60.2925	39.3701		0.596076
Spektrum 96	24.68	57.39	7.49	0.02	0.38	10.03	0				Spektrum 96	14.98	46.4	9.2	0.05	1.07	28.3	0				Spektrum 96	0.111607	58.0915	41.7969		0.572489
Spektrum 97	24.83	57.17	7.32	0.04	0.38	10.26	0.01				Spektrum 97	15.01	46.04	8.95	0.07	1.05	28.85	0.04				Spektrum 97	0.277624	59.0783	40.6441		0.583618
Spektrum 98	25.19	57.05	7.85	0.03	0.4	9.46	0.02				Spektrum 98	15.44	46.58	9.75	0.05	1.13	26.97	0.07				Spektrum 98	0.281532	55.518	44.2005		0.546505
Spektrum 99	24.74	57.29	7.27	0.04	0.44	10.23	0				Spektrum 99	14.95	46.13	8.89	0.08	1.2	28.74	0				Spektrum 99	0.222469	59.3437	40.4338		0.584571
Spektrum 100	24.6	57.52	7.07	0.05	0.39	10.37	0				Spektrum 100	14.85	46.24	8.64	0.09	1.08	29.1	0				Spektrum 100	0.279642	60.179	39.5414		0.59461
Spektrum 101	24.46	57.58	7.04	0.05	0.4	10.47	0				Spektrum 101	14.72	46.17	8.58	0.1	1.1	29.32	0				Spektrum 101	0.278396	60.5234	39.1982		0.597944
NE-5b-1	Atom%										NE-5b-1	Weight%										NE-5b-1	MODAL-COMPOSITIONS (%)
	C	O	Mg	Ca	Mn	Fe	Sr					C	O	Mg	Ca	Mn	Fe	Sr					(Ca,Sr)CO3	(Fe,Mn)CO3	MgCO3		Fe/(Fe+Mg)
Average	24.2973	57.5343	7.2345	0.07825	0.42475	10.425	0.007				Average	14.6125	46.086	8.81	0.1565	1.1665	29.1382	0.029				Average	0.467845	59.7054	39.8267		0.590334
1sd	0.45835	0.304408	0.425576	0.0397421	0.0450548	0.462726	0.00842615				1sd	0.369674	0.384615	0.583725	0.0778315	0.117634	1.04259	0.0341906				1sd	0.213255	2.35984	2.44634
N	40	40	40	40	40	40	40				N	40	40	40	40	40	40	40				N	40	40	40
min	23.03	57.01	6.29	0.02	0.33	9.43	0				min	13.68	45.21	7.54	0.04	0.92	26.85	0				min	0.111607	53.9126	34.4658
max	25.2	58.27	8.46	0.21	0.53	11.46	0.03				max	15.44	46.83	10.41	0.41	1.44	31.48	0.12				max	1.14317	64.6027	45.6557

## Sheet: Apatite
Ne-3b										Ne-3b											MODAL-COMPOSITIONS (%)
Atom %										Weight %
Area 1	O	F	P	Ca	Fe	Sr				Area 1	O	F	P	Ca	Fe	Sr
Apatite 1	56.82	5.41	14.53	23.12	0.12					Apatite 1	37.95	4.29	18.79	38.69	0.28
Apatite 2	57.3	4.8	14.56	23.22	0.12					Apatite 2	38.25	3.8	18.82	38.84	0.28
Ne-3b										Ne-3b
Atom %										Weight %
Area 2	O	F	P	Ca	Fe	Sr				Area 2	O	F	P	Ca	Fe	Sr
Apatite 1	57.45	4.68	14.28	22.64	0.47					Apatite 1	38.32	3.71	18.44	37.84	1.08
Ne-3b										Ne-3b
Atom %										Weight %
Area 5	O	F	P	Ca	Fe	Sr				Area 5	O	F	P	Ca	Fe	Sr
Apatite 1	57.07	5.07	14.6	22.96	0.3					Apatite 1	38.07	4.02	18.85	38.36	0.7
Apatite 2	56.82	5.47	14.5	23.02	0.19					Apatite 2	37.95	4.34	18.75	38.52	0.45
Apatite 3	56.71	5.44	14.62	23.09	0.14					Apatite 3	37.86	4.31	18.9	38.61	0.33
Apatite 4	57	5.14	14.62	23.11	0.13					Apatite 4	38.06	4.07	18.9	38.66	0.31
Apatite 5	56.87	5.32	14.54	23.11	0.16					Apatite 5	37.97	4.22	18.79	38.65	0.38
Apatite 6	56.82	5.31	14.63	23.04	0.2					Apatite 6	37.92	4.21	18.9	38.51	0.47
Apatite 7	56.57	5.27	14.7	23.22	0.25					Apatite 7	37.63	4.16	18.93	38.7	0.57
Ne-3b										Ne-3b
Atom %										Weight %
Area 5	O	F	P	Ca	Fe	Sr				Area 5	O	F	P	Ca	Fe	Sr
Apatite 1	57.55	4.69	14.58	23.01	0.05	0.11				Apatite 1	38.42	3.72	18.84	38.48	0.12	0.41
Apatite 2	56.5	5.95	14.57	22.79	0.06	0.13				Apatite 2	37.72	4.73	18.83	38.1	0.14	0.49
Apatite 3	56.42	5.75	14.62	23.04	0.05	0.12				Apatite 3	37.59	4.55	18.86	38.46	0.11	0.43
Apatite 4	55.9	6.44	14.53	22.95	0.06	0.12				Apatite 4	37.26	5.1	18.75	38.32	0.14	0.42
Apatite 5	56.84	5.31	14.59	23.09	0.06	0.11				Apatite 5	37.89	4.21	18.82	38.55	0.15	0.38
Apatite 6	56.26	5.66	14.68	23.22	0.05	0.13				Apatite 6	37.4	4.47	18.89	38.66	0.11	0.46
Apatite 7	56.83	5.1	14.66	23.26	0.03	0.13				Apatite 7	37.81	4.03	18.88	38.76	0.07	0.46
Apatite 8	57.6	4.82	14.49	22.91	0.04	0.13				Apatite 8	38.49	3.84	18.75	38.34	0.1	0.48
Apatite 9	57.05	5.12	14.55	23.07	0.1	0.12				Apatite 9	38.02	4.05	18.76	38.52	0.23	0.43
Apatite 10	52.69	4.66	16.58	25.87	0.08	0.12				Apatite 10	33.77	3.56	20.55	41.52	0.19	0.41
Apatite 11	57.53	4.82	14.54	22.95	0.05	0.12				Apatite 11	38.43	3.83	18.8	38.39	0.12	0.42
Apatite 12	57.54	5.02	14.51	22.82		0.12				Apatite 12	38.52	3.99	18.8	38.26		0.42
Ne-3b	Atom%									Ne-3b	Weight%
	O	F	P	Ca	Fe	Sr					O	F	P	Ca	Fe	Sr
Average	56.7336	5.23864	14.6582	23.1595	0.129048	0.121667				Average	37.7864	4.14591	18.8909	38.6245	0.301429	0.434167
1sd	0.984694	0.433781	0.427632	0.609541	0.10474	0.00687184				1sd	0.936762	0.351318	0.374796	0.66989	0.241173	0.0306753
N	22	22	22	22	21	12				N	22	22	22	22	21	12
min	52.69	4.66	14.28	22.64	0.03	0.11				min	33.77	3.56	18.44	37.84	0.07	0.38
max	57.6	6.44	16.58	25.87	0.47	0.13				max	38.52	5.1	20.55	41.52	1.08	0.49
Ne-4										Ne-4
Atom %										Weight %
Area 3	O	F	P	Ca	Fe	Sr				Area 3	O	F	P	Ca	Fe	Sr
Apatite dark 1	56.39	5.15	14.66	23.45	0.16	0.11				Apatite dark 1	37.37	4.05	18.81	38.93	0.38	0.38
Apatite dark 2	56.34	5.04	14.75	23.51	0.17	0.11				Apatite dark 2	37.29	3.96	18.91	38.99	0.39	0.38
Apatite bright 1	56.55	5.07	14.72	23.33	0.13	0.11				Apatite bright 1	37.52	4	18.91	38.78	0.31	0.39
Apatite dark 3	56.66	5.24	14.64	23.25	0.05	0.1				Apatite dark 3	37.69	4.14	18.85	38.75	0.13	0.38
Apatite dark 4	56.4	5.35	14.7	23.31	0.08	0.09				Apatite dark 4	37.48	4.22	18.92	38.81	0.18	0.33
Apatite dark 5	56.3	5.25	14.77	23.38	0.14	0.1				Apatite dark 5	37.32	4.13	18.95	38.82	0.33	0.38
Apatite bright 2	56.74	5	14.68	23.32	0.08	0.11				Apatite bright 2	37.69	3.95	18.88	38.81	0.19	0.41
Apatite bright 3	56.48	5.1	14.76	23.43	0.05	0.1				Apatite bright 3	37.48	4.02	18.97	38.96	0.12	0.36
Apatite dark 6	56.67	5.11	14.64	23.29	0.1	0.11				Apatite dark 6	37.66	4.03	18.83	38.77	0.23	0.39
Apatite dark 7	56.82	5	14.64	23.23	0.12	0.13				Apatite dark 7	37.75	3.94	18.83	38.66	0.28	0.46
Apatite bright 4	56.61	5	14.73	23.34	0.14	0.09				Apatite bright 4	37.57	3.94	18.92	38.8	0.33	0.34
Apatite dark 8	56.97	4.91	14.6	23.23	0.07	0.11				Apatite dark 8	37.91	3.88	18.81	38.72	0.17	0.41
Apatite dark 9	56.88	4.82	14.7	23.34	0.09	0.1				Apatite dark 9	37.8	3.8	18.91	38.86	0.2	0.36
Apatite bright 5	56.78	4.85	14.72	23.36	0.09	0.11				Apatite bright 5	37.7	3.82	18.92	38.85	0.21	0.4
Ne-4	Atom%									Ne-4	Weight%
	O	F	P	Ca	Fe	Sr					O	F	P	Ca	Fe	Sr
Average	56.6136	5.06357	14.6936	23.3407	0.105	0.105714				Average	37.5879	3.99143	18.8871	38.8221	0.246429	0.383571
1sd	0.203596	0.146415	0.0499438	0.0789633	0.0373688	0.00979379				1sd	0.179252	0.115193	0.0503457	0.0879268	0.0863222	0.0310776
N	14	14	14	14	14	14				N	14	14	14	14	14	14
min	56.3	4.82	14.6	23.23	0.05	0.09				min	37.29	3.8	18.81	38.66	0.12	0.33
max	56.97	5.35	14.77	23.51	0.17	0.13				max	37.91	4.22	18.97	38.99	0.39	0.46
Ne-5										Ne-5
Atom %										Weight %
Area 6	O	F	P	Ca	Fe	Sr				Area 6	O	F	P	Ca	Fe	Sr
Apatite 1	56.01	6.24	14.51	22.86	0.28	0.1				Apatite 1	37.26	4.93	18.69	38.11	0.64	0.37
Apatite 2	56.7	4.63	14.86	23.57	0.13	0.11				Apatite 2	37.53	3.64	19.04	39.08	0.29	0.41
Apatite 3	56.56	4.67	14.92	23.68	0.06	0.11				Apatite 3	37.43	3.67	19.11	39.26	0.15	0.39
Ne-5	Atom%									Ne-5	Weight%
	O	F	P	Ca	Fe	Sr					O	F	P	Ca	Fe	Sr
Average	56.4233	5.18	14.7633	23.37	0.156667	0.106667				Average	37.4067	4.08	18.9467	38.8167	0.36	0.39
1sd	0.297807	0.749711	0.180801	0.36341	0.0917727	0.00471405				1sd	0.111455	0.601166	0.183727	0.505063	0.206074	0.0163299
N	3	3	3	3	3	3				N	3	3	3	3	3	3
min	56.01	4.63	14.51	22.86	0.06	0.1				min	37.26	3.64	18.69	38.11	0.15	0.37
max	56.7	6.24	14.92	23.68	0.28	0.11				max	37.53	4.93	19.11	39.26	0.64	0.41

## Sheet: Monazite
Ne-3b															Ne-3b
Atom %															Weight %
Area 1	O	P	Ca	Sr	La	Ce	Pr	Nd	Sm						Area 1	O	P	Ca	Sr	La	Ce	Pr	Nd	Sm
Monazite 1	66.62	17.05	0.08		5.23	8.27	0.6	2.01	0.13						Monazite 1	27.49	13.62	0.08		18.75	29.89	2.2	7.46	0.5
Monazite 2	66.6	17.04	0.08		5.18	8.33	0.61	2.07	0.08						Monazite 2	27.45	13.6	0.08		18.53	30.08	2.23	7.7	0.32
Monazite 3	66.52	17.06			5.18	8.42	0.63	2.06	0.14						Monazite 3	27.3	13.55			18.46	30.25	2.28	7.63	0.53
Ne-3b															Ne-3b
Atom %															Weight %
Area 2	O	P	Ca	Sr	La	Ce	Pr	Nd	Sm						Area 2	O	P	Ca	Sr	La	Ce	Pr	Nd	Sm
Monazite 1	66.9	17.09	0.04		4.91	8.28	0.61	2.15	0.01						Monazite 1	27.86	13.77	0.04		17.76	30.18	2.25	8.08	0.06
Ne-3b															Ne-3b
Atom %															Weight %
Area 'monazite spot analyses':	O	P	Ca	Sr	La	Ce	Pr	Nd	Sm	Th	U				Area 'monazite spot analyses':	O	P	Ca	Sr	La	Ce	Pr	Nd	Sm	Th	U
Monazite 1	66.82	16.88	0.1	0.22	5.2	8.17	0.62	1.86	0.09	0.02	0.01				Monazite 1	27.69	13.55	0.11	0.51	18.73	29.66	2.25	6.95	0.36	0.14	0.05
Monazite 2	66.86	16.91	0.05	0.13	5.05	8.17	0.63	2.04	0.13	0.01	0.01				Monazite 2	27.7	13.56	0.06	0.29	18.18	29.66	2.31	7.6	0.51	0.08	0.04
Monazite 3	66.83	16.86	0.11	0.17	5.25	8.18	0.56	1.9	0.13	0.02	0				Monazite 3	27.68	13.52	0.11	0.38	18.88	29.67	2.03	7.08	0.51	0.14	0
Monazite 4	66.92	16.84	0.17	0.14	5.14	8.36	0.59	1.74	0.07	0.03	0.01				Monazite 4	27.81	13.55	0.18	0.32	18.55	30.41	2.17	6.53	0.26	0.17	0.05
Monazite 5	67.02	16.77	0.12	0.21	5.52	8.04	0.55	1.63	0.09	0.04	0				Monazite 5	27.88	13.51	0.12	0.47	19.92	29.29	2.03	6.13	0.37	0.27	0
Monazite 6	66.87	16.83	0.09	0.12	5.15	8.15	0.61	1.99	0.14	0.03	0.02				Monazite 6	27.67	13.48	0.09	0.27	18.5	29.53	2.24	7.42	0.55	0.15	0.09
Monazite 7	66.92	16.8	0.1	0.08	5.17	8.21	0.65	1.93	0.13	0.01	0				Monazite 7	27.71	13.47	0.1	0.17	18.59	29.79	2.37	7.2	0.51	0.08	0
Monazite 8	66.8	16.77	0.08	0.09	5.11	8.29	0.65	2.08	0.12	0.02	0.01				Monazite 8	27.52	13.38	0.08	0.2	18.27	29.9	2.35	7.71	0.47	0.1	0.03
Monazite 9	66.97	16.71	0.11	0.26	5.27	8.1	0.56	1.87	0.11	0.03	0				Monazite 9	27.79	13.42	0.12	0.6	18.99	29.43	2.05	7.01	0.42	0.17	0
Monazite 10	66.84	16.77	0.17	0.11	5.12	8.2	0.65	1.95	0.16	0.03	0				Monazite 10	27.64	13.43	0.18	0.25	18.38	29.71	2.35	7.26	0.62	0.18	0.02
Monazite 11	67.2	16.74	0.13	0.13	4.21	7.98	0.64	2.67	0.25	0.01	0.04				Monazite 11	28.01	13.51	0.14	0.3	15.25	29.15	2.34	10.02	0.98	0.05	0.25
Monazite 12	67.13	16.63	0.08	0.09	5.12	8.23	0.59	1.97	0.11	0.04	0.01				Monazite 12	27.83	13.34	0.08	0.2	18.43	29.88	2.17	7.36	0.43	0.24	0.04
Monazite 13	67.06	16.61	0.05	0.09	5.03	8.22	0.72	2.02	0.13	0.05	0.02				Monazite 13	27.69	13.27	0.05	0.21	18.04	29.72	2.6	7.53	0.49	0.29	0.1
Monazite 14	67.18	16.69	0.07	0.1	5.12	8.22	0.55	1.93	0.12	0.03	0				Monazite 14	27.95	13.44	0.07	0.23	18.5	29.93	2.01	7.24	0.49	0.15	0
Monazite 15	67.02	16.71	0.07	0.15	5.36	8.27	0.53	1.75	0.1	0.04	0				Monazite 15	27.77	13.4	0.08	0.35	19.28	30.03	1.94	6.54	0.38	0.23	0
Monazite 16	66.75	16.83	0.04	0.12	5.06	8.25	0.67	2.05	0.18	0.04	0				Monazite 16	27.47	13.41	0.04	0.27	18.08	29.72	2.44	7.61	0.71	0.24	0
Monazite 17	66.75	16.88	0.05	0.1	5.1	8.32	0.64	2.03	0.09	0.03	0				Monazite 17	27.52	13.48	0.05	0.22	18.26	30.05	2.34	7.56	0.36	0.17	0
Monazite 18	66.7	16.87	0.06	0.05	5.19	8.34	0.62	2.02	0.14	0.01	0				Monazite 18	27.44	13.43	0.06	0.11	18.55	30.05	2.25	7.49	0.53	0.08	0
Monazite 19	66.91	16.84	0.04	0.08	5.2	8.23	0.56	2.01	0.07	0.05	0.02				Monazite 19	27.66	13.47	0.04	0.18	18.66	29.79	2.04	7.47	0.27	0.3	0.12
Monazite 20	66.79	16.72	0.03	0.11	5.16	8.34	0.63	2.03	0.15	0.03	0				Monazite 20	27.44	13.3	0.03	0.26	18.41	30.02	2.28	7.52	0.57	0.15	0.01
Monazite 21	67.03	16.59	0.19	0.12	4.97	8.21	0.66	2.03	0.17	0.04	0				Monazite 21	27.74	13.29	0.2	0.26	17.86	29.75	2.4	7.57	0.68	0.26	0
Monazite 22	66.95	16.78	0.13	0.18	5.09	8.38	0.53	1.84	0.1	0.02	0				Monazite 22	27.8	13.49	0.14	0.41	18.35	30.47	1.93	6.87	0.38	0.15	0.01
Monazite 23	66.8	16.82	0.11	0.23	5.21	8.26	0.61	1.85	0.08	0.02	0				Monazite 23	27.65	13.48	0.12	0.51	18.72	29.94	2.23	6.91	0.32	0.12	0
Monazite24	66.88	16.85	0.15	0.2	5.22	8.27	0.53	1.78	0.06	0.06	0				Monazite24	27.78	13.55	0.16	0.45	18.84	30.09	1.93	6.65	0.22	0.33	0
Monazite 25	66.82	16.87	0.06	0.23	5.27	8.21	0.6	1.92	0.02	0	0				Monazite 25	27.69	13.53	0.07	0.51	18.95	29.79	2.19	7.19	0.07	0.01	0
Monazite 26	66.9	16.79	0.05	0.1	5.05	8.29	0.67	2.03	0.09	0.03	0				Monazite 26	27.65	13.43	0.05	0.22	18.14	30.02	2.43	7.55	0.33	0.15	0.01
Monazite 27	67.03	16.82	0.11	0.08	5.1	8.23	0.58	1.96	0.07	0	0				Monazite 27	27.9	13.56	0.11	0.19	18.42	30.01	2.14	7.35	0.29	0.03	0
Monazite 28	66.97	16.78	0.09	0.09	5.06	8.27	0.66	1.97	0.09	0.03	0				Monazite 28	27.75	13.46	0.09	0.21	18.19	29.99	2.4	7.37	0.36	0.19	0
Monazite 29	66.96	16.8	0.16	0.09	4.25	8.19	0.75	2.54	0.21	0.03	0.01				Monazite 29	27.77	13.49	0.17	0.21	15.31	29.75	2.74	9.49	0.82	0.18	0.07
Monazite 30	66.88	16.82	0.05	0.06	5.1	8.29	0.65	1.99	0.13	0.03	0				Monazite 30	27.63	13.46	0.05	0.13	18.28	29.99	2.35	7.42	0.51	0.18	0
Ne-3b	Line spectrum														Ne-3b	Line spectrum
Atom %															Weight %
Profile 3	O	P	Ca	Sr	La	Ce	Pr	Nd	Sm	Th	U				Profile 3	O	P	Ca	Sr	La	Ce	Pr	Nd	Sm	Th	U
Mnz 1	66.68	16.88	0.11	0.32	5.59	8.11	0.62	1.66	0	0.03	0				Mnz 1	27.58	13.52	0.12	0.72	20.06	29.38	2.25	6.19	0	0.19	0
Mnz 2	67.05	16.99	0	0.11	5.08	8.13	0.52	1.99	0.09	0.04	0				Mnz 2	27.96	13.72	0	0.25	18.38	29.7	1.92	7.49	0.34	0.25	0
Mnz 3	66.83	16.88	0.07	0.06	5.14	8.19	0.65	2.05	0.11	0	0.01				Mnz 3	27.64	13.52	0.08	0.13	18.45	29.66	2.39	7.63	0.44	0.01	0.06
Mnz 4	67.08	17.09	0.07	0.16	5.01	8.07	0.33	2.03	0.17	0	0				Mnz 4	28.17	13.89	0.07	0.37	18.26	29.68	1.23	7.67	0.66	0	0
Mnz 5	67.3	16.63	0.08	0.07	5.13	8.3	0.58	1.74	0.1	0.07	0				Mnz 5	28.03	13.41	0.08	0.16	18.56	30.27	2.11	6.53	0.4	0.44	0
Mnz 6	66.75	16.78	0.13	0.14	5.28	8.31	0.51	1.91	0.19	0.01	0				Mnz 6	27.53	13.4	0.13	0.31	18.91	30.01	1.85	7.09	0.73	0.04	0
Mnz 7	66.82	16.97	0.06	0.08	5.09	8.22	0.62	2	0.13	0.01	0				Mnz 7	27.69	13.61	0.06	0.17	18.31	29.83	2.26	7.48	0.5	0.08	0
Mnz 8	67.05	16.78	0.03	0.07	5.16	8.28	0.57	1.94	0.13	0	0				Mnz 8	27.82	13.47	0.03	0.16	18.58	30.09	2.09	7.24	0.5	0.02	0
Mnz 9	67.05	16.79	0.04	0.06	5.16	8.32	0.52	1.97	0.07	0.01	0.03				Mnz 9	27.81	13.48	0.04	0.14	18.59	30.23	1.88	7.37	0.26	0.03	0.16
Mnz 10	66.75	16.97	0.09	0.17	5.15	8.1	0.62	2.06	0.06	0.03	0				Mnz 10	27.64	13.61	0.09	0.38	18.52	29.36	2.28	7.68	0.25	0.19	0
Mnz 11	67.02	16.72	0.09	0.05	5.08	8.22	0.62	2.01	0.17	0.02	0				Mnz 11	27.76	13.41	0.09	0.12	18.27	29.81	2.28	7.51	0.66	0.1	0
Mnz 12	66.75	16.88	0.08	0.05	5.25	8.15	0.59	1.99	0.23	0.03	0				Mnz 12	27.51	13.46	0.08	0.11	18.78	29.43	2.13	7.41	0.91	0.16	0.02
Mnz 13	67.01	16.85	0.11	0.08	5.2	8.19	0.52	1.88	0.15	0.02	0				Mnz 13	27.88	13.57	0.12	0.17	18.78	29.86	1.91	7.04	0.57	0.1	0
Mnz 14	66.95	16.87	0.04	0.12	5.12	8.35	0.56	1.97	0	0.02	0				Mnz 14	27.79	13.55	0.04	0.27	18.46	30.34	2.05	7.39	0	0.11	0
Mnz 15	66.64	16.82	0.01	0.1	5.26	8.43	0.72	1.88	0.1	0	0.04				Mnz 15	27.3	13.34	0.01	0.23	18.7	30.26	2.61	6.94	0.37	0	0.24
Mnz 16	66.88	16.98	0.03	0.08	5.2	8.29	0.48	1.99	0.05	0.01	0.01				Mnz 16	27.76	13.64	0.03	0.19	18.74	30.15	1.76	7.43	0.19	0.05	0.06
Mnz 17	66.96	16.95	0.03	0.1	5.1	8.26	0.56	1.96	0.03	0.04	0				Mnz 17	27.84	13.65	0.03	0.24	18.39	30.09	2.05	7.34	0.11	0.26	0
Mnz 18	66.93	16.89	0.07	0.04	5.04	8.25	0.66	1.95	0.14	0.01	0.01				Mnz 18	27.76	13.56	0.08	0.1	18.15	29.97	2.41	7.3	0.54	0.06	0.07
Mnz 19	67.21	16.96	0.03	0.14	5.08	7.99	0.5	1.9	0.16	0.01	0.03				Mnz 19	28.17	13.76	0.03	0.32	18.48	29.34	1.83	7.2	0.64	0.04	0.2
Mnz 20	66.76	16.83	0.07	0.03	5.14	8.39	0.57	1.96	0.16	0.07	0.01				Mnz 20	27.45	13.39	0.08	0.07	18.36	30.21	2.07	7.27	0.6	0.41	0.09
Mnz 21	66.73	16.9	0.1	0.08	5.1	8.29	0.64	1.99	0.14	0	0.03				Mnz 21	27.54	13.5	0.11	0.17	18.28	29.95	2.33	7.41	0.54	0	0.17
Mnz 22	66.85	16.88	0.05	0.07	5.19	8.28	0.58	2	0.1	0	0				Mnz 22	27.66	13.52	0.05	0.17	18.64	30.01	2.1	7.46	0.4	0	0
Mnz 23	66.94	16.85	0	0.02	5.16	8.34	0.59	1.91	0.18	0.02	0				Mnz 23	27.67	13.48	0	0.04	18.51	30.18	2.13	7.13	0.7	0.14	0.01
Mnz 24	66.79	16.67	0.08	0.07	5.32	8.4	0.62	1.81	0.21	0.03	0				Mnz 24	27.43	13.25	0.08	0.17	18.97	30.19	2.23	6.69	0.82	0.18	0
Mnz 25	66.83	16.89	0.05	0.03	4.97	8.26	0.77	2.05	0.12	0.03	0.01				Mnz 25	27.6	13.5	0.06	0.07	17.81	29.87	2.79	7.65	0.45	0.15	0.07
Mnz 26	66.8	16.96	0.03	0.14	5.12	8.17	0.64	1.96	0.15	0.03	0				Mnz 26	27.64	13.59	0.03	0.31	18.39	29.63	2.33	7.3	0.6	0.19	0
Mnz 27	66.91	16.82	0	0.08	5.19	8.34	0.58	1.74	0.2	0.06	0.06				Mnz 27	27.58	13.42	0	0.19	18.59	30.12	2.12	6.47	0.78	0.37	0.36
Mnz 28	66.73	16.94	0.07	0.05	5.13	8.34	0.6	1.95	0.15	0.04	0				Mnz 28	27.53	13.53	0.08	0.11	18.39	30.12	2.18	7.25	0.58	0.23	0
Mnz 29	66.95	16.79	0.1	0.09	5.18	8.29	0.48	1.9	0.19	0.04	0				Mnz 29	27.74	13.47	0.1	0.21	18.64	30.06	1.74	7.1	0.72	0.21	0
Mnz 30	66.53	16.93	0.12	0.11	5.14	8.35	0.7	1.94	0.11	0	0.07				Mnz 30	27.3	13.45	0.13	0.24	18.31	30	2.54	7.19	0.42	0	0.43
Mnz 31	66.59	17.23	0.04	0.13	5.18	8.16	0.61	1.96	0.09	0	0				Mnz 31	27.61	13.83	0.04	0.31	18.65	29.62	2.24	7.34	0.36	0	0
Mnz 32	67.01	16.67	0.07	0.06	5.22	8.28	0.57	1.95	0.1	0.05	0.02				Mnz 32	27.67	13.32	0.07	0.14	18.7	29.94	2.07	7.26	0.41	0.3	0.12
Mnz 33	66.89	16.73	0.01	0.07	5.27	8.29	0.51	2.02	0.17	0	0.02				Mnz 33	27.55	13.34	0.01	0.17	18.86	29.91	1.86	7.5	0.67	0	0.14
Mnz 34	66.72	16.78	0.02	0.11	5.25	8.21	0.65	2.03	0.16	0.01	0.05				Mnz 34	27.35	13.32	0.02	0.24	18.7	29.48	2.36	7.5	0.62	0.08	0.32
Mnz 35	66.71	17.09	0.01	0	5.08	8.27	0.6	1.94	0.27	0.02	0				Mnz 35	27.57	13.68	0.01	0	18.21	29.95	2.18	7.24	1.06	0.11	0
Mnz 36	66.69	16.96	0.08	0.08	5.19	8.36	0.52	1.92	0.14	0	0.06				Mnz 36	27.5	13.54	0.09	0.18	18.59	30.18	1.89	7.15	0.52	0	0.37
Mnz 37	67.01	16.92	0.06	0.09	5.07	8.18	0.52	1.94	0.18	0.02	0.01				Mnz 37	27.9	13.64	0.07	0.21	18.33	29.82	1.9	7.29	0.72	0.1	0.03
Mnz 38	67.15	16.81	0.03	0.07	5.09	8.13	0.51	1.89	0.25	0.06	0				Mnz 38	27.95	13.55	0.03	0.16	18.38	29.63	1.86	7.11	0.99	0.34	0
Mnz 39	66.94	16.89	0.04	0.06	5.1	8.21	0.56	1.97	0.19	0.04	0				Mnz 39	27.74	13.55	0.04	0.14	18.34	29.78	2.05	7.35	0.74	0.27	0
Mnz 40	66.94	16.91	0.04	0.1	5.21	8.37	0.42	1.84	0.1	0.06	0.01				Mnz 40	27.77	13.58	0.04	0.22	18.77	30.42	1.55	6.87	0.38	0.36	0.05
Mnz 41	66.97	16.68	0.09	0.04	5.16	8.22	0.53	2.07	0.2	0.05	0				Mnz 41	27.62	13.32	0.09	0.08	18.46	29.69	1.94	7.7	0.78	0.31	0
Mnz 42	67.08	16.84	0.09	0.09	5.11	8.18	0.58	1.87	0.07	0.11	0				Mnz 42	27.89	13.55	0.1	0.2	18.44	29.77	2.12	7.01	0.26	0.65	0.02
Mnz 43	67.12	16.9	0.14	0.07	5.07	8.04	0.53	1.86	0.21	0	0.06				Mnz 43	28.04	13.67	0.15	0.16	18.37	29.44	1.95	7	0.82	0.01	0.4
Mnz 44	67.18	16.7	0.05	0.04	5.01	8.1	0.63	2.13	0.15	0.01	0.01				Mnz 44	27.91	13.43	0.05	0.09	18.08	29.47	2.3	7.96	0.6	0.05	0.07
Mnz 46	66.79	16.86	0.09	0.08	5.2	8.36	0.57	1.91	0.12	0.02	0.01				Mnz 46	27.58	13.48	0.09	0.18	18.63	30.23	2.09	7.11	0.45	0.12	0.05
Mnz 47	66.53	17.09	0.09	0.1	5.26	8.38	0.46	1.91	0.14	0.05	0.01				Mnz 47	27.41	13.63	0.09	0.24	18.8	30.23	1.68	7.08	0.53	0.28	0.03
Mnz 48	66.73	16.6	0.13	0.12	5.2	8.45	0.59	1.94	0.16	0.08	0.01				Mnz 48	27.3	13.15	0.13	0.27	18.46	30.27	2.12	7.17	0.62	0.46	0.05
Mnz 49	67.06	16.82	0.02	0.03	5.14	8.15	0.5	2.02	0.18	0.06	0				Mnz 49	27.81	13.51	0.02	0.07	18.53	29.62	1.82	7.54	0.71	0.37	0
Mnz 50	66.6	16.93	0.04	0.02	5.28	8.26	0.59	2.03	0.24	0	0.02				Mnz 50	27.32	13.44	0.04	0.03	18.8	29.66	2.14	7.5	0.94	0	0.11
Mnz 51	66.77	16.93	0.08	0.04	5.3	8.34	0.54	1.91	0.05	0.03	0				Mnz 51	27.6	13.55	0.09	0.1	19.03	30.2	1.97	7.12	0.18	0.16	0
Mnz 52	67.26	16.88	0.12	0.07	5.16	8.16	0.45	1.85	0	0.04	0				Mnz 52	28.23	13.72	0.12	0.17	18.8	30.01	1.67	7.01	0	0.26	0
Mnz 53	67.07	17.02	0.05	0.14	5.25	8	0.46	1.78	0.16	0.04	0.03				Mnz 53	28.04	13.77	0.06	0.32	19.05	29.28	1.7	6.7	0.65	0.26	0.17
Mnz 54	66.9	16.77	0.11	0.06	5.29	8.22	0.66	1.88	0.1	0.01	0				Mnz 54	27.68	13.44	0.11	0.14	18.99	29.8	2.42	7.02	0.38	0.04	0
Mnz 55	66.59	16.93	0.11	0.07	5.19	8.27	0.63	2.01	0.17	0.01	0.02				Mnz 55	27.37	13.47	0.11	0.16	18.53	29.75	2.26	7.45	0.67	0.08	0.13
Mnz 56	66.97	16.83	0.06	0.12	5.02	8.18	0.66	1.98	0.15	0.04	0				Mnz 56	27.77	13.51	0.06	0.26	18.08	29.7	2.39	7.41	0.57	0.24	0
Mnz 57	66.97	16.78	0.06	0.07	5.15	8.17	0.6	1.95	0.14	0.11	0				Mnz 57	27.67	13.42	0.06	0.16	18.48	29.57	2.19	7.25	0.52	0.67	0
Mnz 58	66.63	16.94	0.06	0.01	5.3	8.26	0.55	2.07	0.11	0.08	0				Mnz 58	27.35	13.46	0.06	0.03	18.87	29.68	1.98	7.65	0.44	0.48	0
Mnz 59	66.99	16.89	0.13	0	5.3	8.23	0.54	1.84	0.08	0.01	0				Mnz 59	27.88	13.61	0.13	0	19.15	30.02	1.97	6.91	0.3	0.04	0
Mnz 60	66.82	16.73	0.12	0.05	5.14	8.39	0.62	1.9	0.19	0.05	0				Mnz 60	27.5	13.33	0.12	0.11	18.38	30.24	2.26	7.04	0.73	0.3	0
Mnz 61	66.74	16.95	0.1	0.04	5.11	8.27	0.63	1.97	0.18	0.01	0				Mnz 61	27.58	13.56	0.1	0.1	18.33	29.94	2.29	7.35	0.7	0.06	0
Mnz 62	66.55	16.87	0.11	0.08	5.21	8.26	0.72	2.03	0.16	0	0				Mnz 62	27.3	13.4	0.12	0.17	18.56	29.67	2.6	7.51	0.63	0.02	0
Mnz 63	67	16.95	0.07	0.1	5.22	8.28	0.42	1.77	0.16	0.03	0				Mnz 63	27.93	13.68	0.08	0.22	18.88	30.22	1.52	6.66	0.62	0.18	0.01
Mnz 64	66.82	17.11	0.07	0.07	5.16	8.18	0.52	1.93	0.1	0.03	0				Mnz 64	27.8	13.78	0.07	0.17	18.65	29.82	1.89	7.24	0.38	0.21	0
Mnz 65	66.7	16.8	0.05	0.09	5.17	8.2	0.65	2.16	0.13	0.04	0				Mnz 65	27.38	13.35	0.05	0.19	18.43	29.5	2.33	8	0.5	0.26	0
Mnz 66	67.27	16.53	0.11	0.09	5.16	8.13	0.6	1.96	0.12	0.03	0				Mnz 66	27.96	13.3	0.11	0.2	18.63	29.6	2.19	7.35	0.47	0.19	0
Mnz 67	66.98	16.81	0.12	0	5.15	8.13	0.54	2.12	0.09	0.06	0				Mnz 67	27.75	13.48	0.13	0	18.53	29.49	1.97	7.92	0.35	0.37	0
Mnz 68	66.78	16.84	0.06	0.13	5.21	8.42	0.65	1.8	0.05	0.04	0.02				Mnz 68	27.54	13.45	0.06	0.3	18.65	30.42	2.36	6.68	0.19	0.22	0.15
Mnz 69	66.56	16.82	0.06	0.09	5.27	8.37	0.68	1.92	0.18	0	0.05				Mnz 69	27.21	13.31	0.06	0.21	18.7	29.98	2.46	7.09	0.68	0	0.3
Mnz 70	67.03	16.96	0	0.22	5.33	8.22	0.39	1.78	0.03	0.05	0				Mnz 70	27.96	13.7	0	0.49	19.3	30.02	1.42	6.69	0.1	0.32	0
Mnz 71	69.7	16.12	0.07	0.08	4.58	7.21	0.41	1.82	0.01	0	0.01				Mnz 71	31.03	13.9	0.08	0.2	17.72	28.1	1.61	7.29	0.02	0	0.05
Mnz 72	66.93	16.72	0.11	0.15	5.24	8.3	0.52	1.91	0.08	0.04	0				Mnz 72	27.68	13.39	0.11	0.35	18.83	30.07	1.89	7.14	0.29	0.25	0
Mnz 73	67.16	16.68	0.14	0.1	5.06	8.27	0.52	1.82	0.23	0.03	0				Mnz 73	27.96	13.44	0.14	0.22	18.28	30.15	1.89	6.84	0.89	0.19	0
Mnz 74	67.03	16.74	0.1	0.08	5.18	8.11	0.56	1.99	0.11	0.04	0.07				Mnz 74	27.75	13.42	0.11	0.17	18.61	29.4	2.04	7.41	0.43	0.25	0.42
Mnz 75	67.06	16.64	0	0.03	5.2	8.36	0.55	1.93	0.15	0.07	0				Mnz 75	27.66	13.29	0	0.08	18.63	30.18	2	7.18	0.59	0.41	0
Mnz 76	67.02	16.81	0.01	0.08	5.18	8.3	0.61	1.84	0.14	0	0				Mnz 76	27.8	13.5	0.01	0.19	18.66	30.15	2.22	6.88	0.55	0.01	0.03
Mnz 77	66.56	16.95	0	0.1	5.28	8.49	0.5	1.88	0.2	0.04	0				Mnz 77	27.28	13.44	0	0.21	18.79	30.47	1.81	6.94	0.79	0.26	0
Mnz 78	66.89	16.93	0.07	0.06	5.1	8.31	0.6	1.99	0.03	0.01	0				Mnz 78	27.75	13.59	0.07	0.13	18.38	30.2	2.19	7.46	0.13	0.09	0
Mnz 79	66.84	16.96	0.06	0.07	5.34	8.36	0.48	1.73	0.12	0.04	0				Mnz 79	27.7	13.61	0.06	0.16	19.22	30.35	1.74	6.48	0.46	0.21	0
Mnz 80	67.28	16.86	0.05	0.09	5.1	8.15	0.52	1.85	0.07	0.02	0.01				Mnz 80	28.21	13.68	0.05	0.21	18.58	29.91	1.91	7.01	0.29	0.1	0.03
Mnz 81	66.69	16.96	0.12	0.06	5.15	8.36	0.61	1.88	0.1	0.05	0				Mnz 81	27.53	13.56	0.13	0.14	18.46	30.24	2.23	6.98	0.39	0.3	0.03
Ne-3b															Ne-3b
Atom %															Weight %
Area 5	O	P	Ca	Sr	La	Ce	Pr	Nd	Sm	Th	U				Area 5	O	P	Ca	Sr	La	Ce	Pr	Nd	Sm	Th	U
Monazite 1	66.61	16.85	0.14		5.09	8.25	0.54	1.91							Monazite 1	27.72	13.58	0.14		18.4	30.07	1.98	7.16
Monazite 2	66.63	16.85			5.08	8.32	0.58	1.97							Monazite 2	27.62	13.52			18.29	30.2	2.12	7.35
Monazite 3	66.97	16.79	0.18		5.12	8.32	0.56	1.96							Monazite 3	27.85	13.52	0.18		18.5	30.31	2.06	7.36
Monazite 4	66.98	16.61	0.6		4.99	8.04	0.54	1.91							Monazite 4	28.18	13.53	0.64		18.21	29.62	2.01	7.25
Monazite 5	66.5	16.77	0.1		5.39	8.3	0.57	1.74							Monazite 5	27.46	13.41	0.1		19.32	30.03	2.07	6.49
Monazite 6	66.51	16.92	0.17		5.3	8.11	0.49	1.76							Monazite 6	27.7	13.65	0.18		19.15	29.58	1.78	6.61
Monazite 7	66.62	16.55	0.47		5	8.11	0.62	1.97	0.16						Monazite 7	27.66	13.3	0.49		18.03	29.48	2.25	7.39	0.61
Ne-3b															Ne-3b
Atom %															Weight %
Area 7	O	P	Ca	Sr	La	Ce	Pr	Nd	Sm	Th	U				Area 7	O	P	Ca	Sr	La	Ce	Pr	Nd	Sm	Th	U
Monazite 1	66.87	16.89	0.07		4.96	8.28	0.65	2.12	0.16						Monazite 1	27.67	13.53	0.07		17.81	30.01	2.36	7.92	0.64
Monazite 2	66.98	16.91	0.06		4.92	8.23	0.58	2.17	0.15						Monazite 2	27.82	13.6	0.06		17.73	29.94	2.13	8.13	0.57
Monazite 3	66.67	17.01	0.09		4.91	8.32	0.69	2.12	0.18						Monazite 3	27.52	13.6	0.09		17.61	30.06	2.52	7.89	0.72
Monazite 4	66.53	17.07	0.06		4.92	8.31	0.72	2.2	0.17						Monazite 4	27.37	13.6	0.07		17.59	29.95	2.62	8.18	0.64
Monazite 5	66.31	17.2	0.04		5.03	8.43	0.68	2.19	0.12						Monazite 5	27.17	13.64	0.04		17.9	30.26	2.47	8.08	0.45
Monazite 6	66.56	16.97	0.05		5	8.37	0.68	2.16	0.21						Monazite 6	27.31	13.48	0.05		17.82	30.06	2.47	8	0.81
Monazite 7	66.59	17	0.09		5.04	8.39	0.61	2.16	0.13						Monazite 7	27.4	13.54	0.09		18	30.25	2.21	8	0.52
Monazite 8	66.64	16.98	0.09		5.01	8.33	0.66	2.15	0.15						Monazite 8	27.45	13.54	0.09		17.9	30.06	2.38	8	0.58
Monazite 9	66.95	16.87	0.08		4.93	8.19	0.67	2.13	0.16						Monazite 9	27.77	13.55	0.09		17.77	29.76	2.44	7.97	0.64
Ne-3b	Atom%														Ne-3b	Weight%
	O	P	Ca	Sr	La	Ce	Pr	Nd	Sm	Th	U					O	P	Ca	Sr	La	Ce	Pr	Nd	Sm	Th	U
Average	66.8622	16.8543	0.0834646	0.0955963	5.13806	8.25093	0.586822	1.96132	0.129837	0.0293578	0.00880734				Average	27.6751	13.5054	0.0867717	0.216789	18.464	29.9083	2.13845	7.31899	0.504797	0.176422	0.0537615
1sd	0.194251	0.127479	0.0710371	0.0547627	0.158975	0.100822	0.072753	0.137561	0.0548017	0.0227582	0.0162957				1sd	0.218121	0.124968	0.0750735	0.12354	0.559893	0.287696	0.260502	0.506134	0.214864	0.136082	0.0997408
N	129	129	127	109	129	129	129	129	123	109	109				N	129	129	127	109	129	129	129	129	123	109	109
min	66.31	16.53	0	0	4.21	7.98	0.33	1.63	0	0	0				min	27.17	13.15	0	0	15.25	29.15	1.23	6.13	0	0	0
max	67.3	17.23	0.6	0.32	5.59	8.49	0.77	2.67	0.27	0.11	0.07				max	28.23	13.89	0.64	0.72	20.06	30.47	2.79	10.02	1.06	0.67	0.43
Ne-3b															Ne-3b
Atom %															Weight %
Area Analyses	O	F	P	La	Ce	Pr	Nd								Area Analyses	O	F	P	La	Ce	Pr	Nd
Spectrum 12	66.6	0.42	17.12	5.07	8.34	0.61	1.83								Spectrum 12	27.84	0.21	13.86	18.41	30.52	2.26	6.91
Spectrum 13	66.79	0.02	17.01	5.18	8.4	0.6	2								Spectrum 13	27.64	0.01	13.62	18.61	30.46	2.2	7.45
Spectrum 14	66.16	0.94	16.8	5.17	8.24	0.64	2.05								Spectrum 14	27.45	0.46	13.49	18.63	29.93	2.36	7.68
Spectrum 15	66.53	0.5	17.08	5.21	8.25	0.5	1.93								Spectrum 15	27.79	0.25	13.81	18.88	30.19	1.83	7.25
Spectrum 17	66.58	0.3	16.89	5.14	8.35	0.64	2.1								Spectrum 17	27.51	0.15	13.52	18.43	30.24	2.34	7.81
Spectrum 18	66.57	0.49	17.16	5.16	8.33	0.42	1.86								Spectrum18	27.89	0.24	13.92	18.79	30.55	1.57	7.04
Spectrum 19	66.64	0.17	16.86	5.23	8.62	0.57	1.91								Spectrum 19	27.46	0.08	13.45	18.7	31.12	2.09	7.1
Spectrum 20	66.69	0.14	16.92	5.12	8.37	0.68	2.09								Spectrum 20	27.54	0.07	13.53	18.36	30.26	2.47	7.79
Ne-3b	Atom%														Ne-3b	Weight%
Area Analyses	O	F	P	La	Ce	Pr	Nd									O	F	P	La	Ce	Pr	Nd
Average	66.57	0.3725	16.98	5.16	8.3625	0.5825	1.97125								Average	27.64	0.18375	13.65	18.6012	30.4088	2.14	7.37875
1sd	0.172627	0.269014	0.123187	0.0474342	0.110199	0.0794906	0.0971388								1sd	0.165982	0.132093	0.173349	0.176099	0.329486	0.282577	0.331604
N	8	8	8	8	8	8	8								N	8	8	8	8	8	8	8
min	66.16	0.02	16.8	5.07	8.24	0.42	1.83								min	27.45	0.01	13.45	18.36	29.93	1.57	6.91
max	66.79	0.94	17.16	5.23	8.62	0.68	2.1								max	27.89	0.46	13.92	18.88	31.12	2.47	7.81
Ne-4															Ne-4
Atom %															Weight %
Area Analyses	O	P	Ca	La	Ce	Pr	Nd								Area Analyses	O	P	Ca	La	Ce	Pr	Nd	Sm
Monazite 1	66.74	17.04		5.14	8.32	0.66	2.12								Monazite 1	27.58	13.63		18.42	30.09	2.39	7.88
Monazite 2	66.47	17.15		5.13	8.59	0.63	2.04								Monazite 2	27.32	13.65		18.31	30.9	2.28	7.54
Monazite 3	66.65	16.93		5.09	8.6	0.65	2.08								Monazite 3	27.39	13.46		18.16	30.93	2.34	7.71
Monazite 4	66.58	17.08		5.27	8.45	0.58	2.04								Monazite 4	27.41	13.61		18.83	30.46	2.12	7.58
Monazite 5	66.64	17.24		5.09	8.41	0.53	2.09								Monazite 5	27.61	13.83		18.3	30.53	1.93	7.8
Monazite 6	66.83	16.95		5.23	8.55	0.56	1.88								Monazite 6	27.64	13.57		18.77	30.97	2.05	6.99
Ne-4	Atom%														Ne-4	Weight%
	O	P	Ca	La	Ce	Pr	Nd									O	P	Ca	La	Ce	Pr	Nd
Average	66.6517	17.065		5.15833	8.48667	0.601667	2.04167								Average	27.4917	13.625		18.465	30.6467	2.185	7.58333
1sd	0.113932	0.108128		0.0684146	0.102089	0.0481029	0.0775493								1sd	0.122667	0.110416		0.249182	0.318154	0.164595	0.290096
N	6	6		6	6	6	6								N	6	6		6	6	6	6
min	66.47	16.93		5.09	8.32	0.53	1.88								min	27.32	13.46		18.16	30.09	1.93	6.99
max	66.83	17.24		5.27	8.6	0.66	2.12								max	27.64	13.83		18.83	30.97	2.39	7.88
NE-5a-1	(coated with gold)														NE-5a-1
	Atom%															Weight%
Area 6	O	P	Ca	Sr	La	Ce	Pr	Nd	Sm	Th	U				Area 6	O	P	Ca	Sr	La	Ce	Pr	Nd	Sm	Th	U
Spektrum 138	68.07	16.08	0.41	0.06	4.89	8.01	0.51	1.84	0.07	0.05	0.01				Spektrum 138	28.88	13.21	0.44	0.15	18.01	29.78	1.91	7.02	0.28	0.29	0.03
Spektrum 139	67.71	16.25	0.16	0.09	4.93	8.05	0.62	1.95	0.18	0.05	0.01				Spektrum 139	28.34	13.17	0.17	0.2	17.91	29.51	2.3	7.36	0.7	0.3	0.05
Spektrum 140	67.99	16.1	0.15	0.03	4.94	7.99	0.63	1.99	0.11	0.04	0.02				Spektrum 140	28.56	13.09	0.16	0.06	18.02	29.4	2.32	7.55	0.45	0.27	0.1
Spektrum 141	67.67	16.2	0.16	0.06	5.09	8.16	0.61	1.81	0.22	0.03	0				Spektrum 141	28.26	13.09	0.17	0.14	18.45	29.83	2.24	6.8	0.86	0.18	0
Spektrum 142	68.02	16.14	0.15	0.06	4.77	8.12	0.68	1.99	0.06	0	0				Spektrum 142	28.68	13.18	0.16	0.15	17.47	30	2.51	7.58	0.25	0.01	0.01
Spektrum 143	67.71	16.27	0.39	0.07	4.47	8.05	0.64	2.21	0.13	0.05	0				Spektrum 143	28.52	13.27	0.41	0.17	16.36	29.71	2.36	8.4	0.5	0.3	0.01
Spektrum 144	68.15	15.95	0.38	0.11	3.95	7.88	0.7	2.57	0.22	0.06	0.04				Spektrum 144	28.8	13.05	0.41	0.25	14.5	29.14	2.61	9.78	0.86	0.37	0.25
Spektrum 145	67.96	16.18	0.29	0.11	4.83	7.86	0.58	1.97	0.13	0.09	0				Spektrum 145	28.7	13.23	0.3	0.25	17.72	29.08	2.16	7.48	0.53	0.55	0
Spektrum 146	67.85	16.04	0.47	0.04	4.77	8.02	0.67	1.97	0.12	0.04	0.01				Spektrum 146	28.58	13.08	0.5	0.09	17.46	29.59	2.47	7.47	0.47	0.24	0.04
Spektrum 147	67.78	16.13	0.4	0.06	4.84	8.1	0.54	1.99	0.14	0.03	0				Spektrum 147	28.51	13.13	0.43	0.13	17.68	29.86	1.98	7.53	0.55	0.2	0
NE-5a-1	Atom%														NE-5a-1	Weight%
	O	P	Ca	Sr	La	Ce	Pr	Nd	Sm	Th	U					O	P	Ca	Sr	La	Ce	Pr	Nd	Sm	Th	U
Average	67.891	16.134	0.296	0.069	4.748	8.024	0.618	2.029	0.138	0.044	0.009				Average	28.583	13.15	0.315	0.159	17.358	29.59	2.286	7.697	0.545	0.271	0.049
1sd	0.160838	0.0923255	0.122327	0.0254755	0.306163	0.0915642	0.0575847	0.206613	0.0521153	0.022	0.0122066				1sd	0.182102	0.0694262	0.130939	0.0585577	1.08547	0.292267	0.211858	0.798211	0.199161	0.131183	0.0732735
N	10	10	10	10	10	10	10	10	10	10	10				N	10	10	10	10	10	10	10	10	10	10	10
min	67.67	15.95	0.15	0.03	3.95	7.86	0.51	1.81	0.06	0	0				min	28.26	13.05	0.16	0.06	14.5	29.08	1.91	6.8	0.25	0.01	0
max	68.15	16.27	0.47	0.11	5.09	8.16	0.7	2.57	0.22	0.09	0.04				max	28.88	13.27	0.5	0.25	18.45	30	2.61	9.78	0.86	0.55	0.25
								La/Nd
						4.89	1.84	2.65761												18.01	7.02
						4.93	1.95	2.52821												17.91	7.36
						4.94	1.99	2.48241												18.02	7.55
						5.09	1.81	2.81215												18.45	6.8
						4.77	1.99	2.39698												17.47	7.58
						4.47	2.21	2.02262												16.36	8.4
						3.95	2.57	1.53696												14.5	9.78
						4.83	1.97	2.45178												17.72	7.48
						4.77	1.97	2.42132												17.46	7.47
						4.84	1.99	2.43216												17.68	7.53
						5.14	2.12
						5.13	2.04
						5.09	2.08
						5.27	2.04
						5.09	2.09
						5.23	1.88
						5.07	1.83
						5.18	2
						5.17	2.05
						5.21	1.93
						5.14	2.1
						5.16	1.86
						5.23	1.91
						5.12	2.09
						4.96	2.12
						4.92	2.17
						4.91	2.12
						4.92	2.2
						5.03	2.19
						5	2.16
						5.04	2.16
						5.01	2.15
						4.93	2.13
						5.09	1.91
						5.08	1.97
						5.12	1.96
						4.99	1.91
						5.39	1.74
						5.3	1.76
						5	1.97
						5.59	1.66
						5.08	1.99
						5.14	2.05
						5.01	2.03
						5.13	1.74
						5.28	1.91
						5.09	2
						5.16	1.94
						5.16	1.97
						5.15	2.06
						5.08	2.01
						5.25	1.99
						5.2	1.88
						5.12	1.97
						5.26	1.88
						5.2	1.99
						5.1	1.96
						5.04	1.95
						5.08	1.9
						5.14	1.96
						5.1	1.99
						5.19	2
						5.16	1.91
						5.32	1.81
						4.97	2.05
						5.12	1.96
						5.19	1.74
						5.13	1.95
						5.18	1.9
						5.14	1.94
						5.18	1.96
						5.22	1.95
						5.27	2.02
						5.25	2.03
						5.08	1.94
						5.19	1.92
						5.07	1.94
						5.09	1.89
						5.1	1.97
						5.21	1.84
						5.16	2.07
						5.11	1.87
						5.07	1.86
						5.01	2.13
						5.2	1.91
						5.26	1.91
						5.2	1.94
						5.14	2.02
						5.28	2.03
						5.3	1.91
						5.16	1.85
						5.25	1.78
						5.29	1.88
						5.19	2.01
						5.02	1.98
						5.15	1.95
						5.3	2.07
						5.3	1.84
						5.14	1.9
						5.11	1.97
						5.21	2.03
						5.22	1.77
						5.16	1.93
						5.17	2.16
						5.16	1.96
						5.15	2.12
						5.21	1.8
						5.27	1.92
						5.33	1.78
						5.24	1.91
						5.06	1.82
						5.18	1.99
						5.2	1.93
						5.18	1.84
						5.28	1.88
						5.1	1.99
						5.34	1.73
						5.1	1.85
						5.15	1.88
						5.2	1.86
						5.05	2.04
						5.25	1.9
						5.14	1.74
						5.52	1.63
						5.15	1.99
						5.17	1.93
						5.11	2.08
						5.27	1.87
						5.12	1.95
						4.21	2.67
						5.12	1.97
						5.03	2.02
						5.12	1.93
						5.36	1.75
						5.06	2.05
						5.1	2.03
						5.19	2.02
						5.2	2.01
						5.16	2.03
						4.97	2.03
						5.09	1.84
						5.21	1.85
						5.22	1.78
						5.27	1.92
						5.05	2.03
						5.1	1.96
						5.06	1.97
						4.25	2.54
						5.1	1.99
						4.91	2.15
						5.23	2.01
						5.18	2.07
						5.18	2.06

## Sheet: Columbite
Ne-3b															Ne-3b
Atom %															Weight %
Area 5	O	Mg	Ca	Sc	Ti	Mn	Fe	Nb	Ta						Area 5	O	Mg	Ca	Sc	Ti	Mn	Fe	Nb	Ta
Columbit 1	66.87	1.25	0.05	0.33	0.6	0.29	8.62	21.86	0.11						Columbit 1	28.95	0.83	0.06	0.41	0.78	0.44	13.03	54.96	0.56
Columbit 2	66.78	1.11	0.06	0.36	0.68	0.25	8.95	21.65	0.15						Columbit 2	28.88	0.73	0.07	0.44	0.88	0.38	13.52	54.38	0.73
Columbit 3	66.78	1.53	0.08	0.4	0.7	0.27	8.46	21.65	0.13						Columbit 3	29.02	1.01	0.09	0.49	0.91	0.4	12.84	54.63	0.63
Columbit 4	66.72	1.26	0.03	0.39	0.61	0.29	8.95	21.63	0.13						Columbit 4	28.9	0.83	0.03	0.47	0.8	0.43	13.53	54.39	0.62
Columbit 5	66.77	1.69	0.04	0.37	0.73	0.32	8.32	21.61	0.14						Columbit 5	29.05	1.12	0.04	0.45	0.96	0.48	12.64	54.59	0.67
Columbit 6	66.81	1.34	0.06	0.37	0.62	0.3	8.63	21.75	0.12						Columbit 6	28.95	0.88	0.06	0.45	0.81	0.45	13.05	54.74	0.61
Columbit 7	66.74	1.62	0.05	0.33	0.69	0.31	8.53	21.63	0.12						Columbit 7	29.01	1.07	0.05	0.4	0.9	0.46	12.94	54.59	0.58
Columbit 8	66.8	1.64	0.09	0.32	0.59	0.29	8.39	21.76	0.14						Columbit 8	29	1.08	0.1	0.39	0.77	0.43	12.71	54.85	0.68
Columbit 9	66.69	1.24	0.03	0.35	0.6	0.29	9.05	21.61	0.13						Columbit 9	28.87	0.81	0.04	0.43	0.78	0.43	13.68	54.31	0.64
Columbit 10	66.74	1.55	0.04	0.35	0.55	0.29	8.64	21.71	0.13						Columbit 10	28.95	1.02	0.05	0.42	0.71	0.43	13.09	54.69	0.62
Columbit 11	66.68	1.06	0.04	0.34	0.69	0.32	9.19	21.53	0.15						Columbit 11	28.83	0.7	0.04	0.42	0.89	0.47	13.88	54.05	0.72
Columbit 12	66.79	1.75	0.09	0.39	0.68	0.29	8.21	21.65	0.15						Columbit 12	29.05	1.16	0.1	0.47	0.89	0.44	12.46	54.7	0.74
Columbit 13	66.68	1.43	0.25	0.37	0.58	0.27	8.68	21.61	0.13						Columbit 13	28.94	0.94	0.28	0.45	0.75	0.4	13.15	54.45	0.63
Columbit 15	66.79	1.17	0.04	0.39	0.78	0.27	8.81	21.61	0.14						Columbit 15	28.94	0.77	0.04	0.48	1.01	0.4	13.33	54.36	0.67
Columbit 16	66.8	1.19	0.15	0.35	0.69	0.26	8.74	21.67	0.14						Columbit 16	28.92	0.78	0.17	0.42	0.9	0.39	13.22	54.5	0.71
Columbit 17	66.78	1.36	0.04	0.35	0.56	0.31	8.71	21.75	0.14						Columbit 17	28.92	0.89	0.05	0.43	0.72	0.46	13.16	54.68	0.69
Columbit 18	66.79	1.37	0.04	0.3	0.53	0.28	8.75	21.83	0.11						Columbit 18	28.93	0.9	0.04	0.36	0.69	0.42	13.23	54.9	0.54
Columbit 19	66.76	1.04	0.09	0.37	0.73	0.24	9.03	21.61	0.13						Columbit 19	28.89	0.68	0.1	0.44	0.95	0.36	13.64	54.29	0.65
Columbit 20	66.49	1.58	0.2	0.4	0.64	0.28	8.99	21.3	0.13						Columbit 20	28.92	1.05	0.22	0.49	0.83	0.42	13.64	53.79	0.65
Columbit 21	66.79	1.14	0.12	0.36	0.68	0.25	8.86	21.66	0.15						Columbit 21	28.9	0.75	0.13	0.43	0.89	0.37	13.37	54.43	0.73
Columbit 22	66.75	1.2	0.11	0.34	0.67	0.32	8.83	21.66	0.12						Columbit 22	28.92	0.79	0.12	0.41	0.87	0.47	13.35	54.48	0.58
Columbit 23	66.76	1.08	0.12	0.33	0.66	0.26	8.98	21.67	0.12						Columbit 23	28.89	0.71	0.13	0.4	0.86	0.39	13.57	54.46	0.59
Columbit 24	66.66	1.09	0.1	0.35	0.73	0.3	9.17	21.46	0.15						Columbit 24	28.85	0.72	0.1	0.43	0.95	0.44	13.85	53.95	0.71
Ne-3b															Ne-3b
Atom %															Weight %
Area 7	O	Mg	Ca	Sc	Ti	Mn	Fe	Nb	Ta						Area 7	O	Mg	Ca	Sc	Ti	Mn	Fe	Nb	Ta
Columbit 1	65.85	1.73	0.23	0.53	0.65	0.29	8.3	22.12	0.31						Columbit 1	28.1	1.12	0.25	0.63	0.83	0.42	12.36	54.79	1.51
Ne-3b															Ne-3b
Atom %															Weight %
Area 9	O	Mg	Ca	Sc	Ti	Mn	Fe	Nb	Ta						Area 9	O	Mg	Ca	Sc	Ti	Mn	Fe	Nb	Ta
Columbit 1	66.81	1.44	0.06	0.39	0.57	0.31	8.52	21.78	0.12						Columbit 1	28.97	0.95	0.07	0.47	0.74	0.46	12.9	54.85	0.58
Columbit 2	66.82	1.55	0.05	0.31	0.45	0.33	8.47	21.86	0.15						Columbit 2	28.94	1.02	0.05	0.38	0.59	0.49	12.81	54.98	0.74
Ne-3b	Atom%														Ne-3b	Weight%
	O	Mg	Ca	Sc	Ti	Mn	Fe	Nb	Ta							O	Mg	Ca	Sc	Ti	Mn	Fe	Nb	Ta
Average	66.7192	1.36192	0.0869231	0.363077	0.640769	0.287692	8.72231	21.6781	0.14						Average	28.9035	0.896538	0.0953846	0.440769	0.833077	0.428077	13.1904	54.5304	0.683846
1sd	0.187779	0.222469	0.0597282	0.0427667	0.0732185	0.0235842	0.266996	0.146288	0.036162						1sd	0.169818	0.147151	0.0661717	0.0499171	0.0956665	0.0338571	0.403432	0.294246	0.175084
N	26	26	26	26	26	26	26	26	26						N	26	26	26	26	26	26	26	26	26
min	65.85	1.04	0.03	0.3	0.45	0.24	8.21	21.3	0.11						min	28.1	0.68	0.03	0.36	0.59	0.36	12.36	53.79	0.54
max	66.87	1.75	0.25	0.53	0.78	0.33	9.19	22.12	0.31						max	29.05	1.16	0.28	0.63	1.01	0.49	13.88	54.98	1.51

## Sheet: Zircon
Ne-5																		Ne-5
Atom%																		Weight%
Area 5	O	Mg	Al	Si	Ca	Sc	Ti	Fe	Zr	Nb	Ce	Nd	Hf	U				Area 5	O	Mg	Al	Si	Ca	Sc	Ti	Fe	Zr	Nb	Ce	Nd	Hf	U
Spektrum 59	69.54	0.85	0.5	11.41	0.93	0.3	0.12	0.77	14.06	0.65	0.04	0.03	0.52	0.28				Spektrum 59	36.12	0.67	0.44	10.4	1.21	0.43	0.19	1.39	41.65	1.96	0.19	0.15	3.02	2.18
Spektrum 60	69.71	0.84	0.5	11.25	1.05	0.33	0.14	0.67	13.79	0.75	0.06	0.04	0.51	0.35				Spektrum 60	36.17	0.66	0.44	10.25	1.37	0.49	0.21	1.22	40.78	2.26	0.25	0.2	2.96	2.73
Spektrum 61	69.67	0.89	0.52	11.28	0.97	0.3	0.12	0.78	13.89	0.66	0.05	0.04	0.5	0.32				Spektrum 61	36.24	0.71	0.45	10.3	1.26	0.44	0.19	1.41	41.2	1.99	0.24	0.19	2.93	2.45
Spektrum 62	66			16.35	0.1	0.07		0.12	16.75				0.58	0.02				Spektrum 62	33.36			14.5	0.13	0.11		0.21	48.28				3.27	0.13
Spektrum 63	66.03			16.3	0.16	0.06		0.17	16.69				0.56	0.03				Spektrum 63	33.41			14.48	0.2	0.08		0.31	48.14				3.18	0.2
Spektrum 64	66.24			16.13	0.18	0.06		0.16	16.64				0.56	0.03				Spektrum 64	33.57			14.35	0.23	0.08		0.28	48.09				3.16	0.24
Spektrum 65	67.89	0.85	0.48	12.13	0.92	0.32	0.13	0.84	14.76	0.74	0.07	0.02	0.54	0.32				Spektrum 65	34.33	0.66	0.41	10.77	1.16	0.45	0.19	1.49	42.54	2.17	0.31	0.11	3.04	2.37

## Sheet: Pyrite & Chalcopyrite
Ne-3b																	Ne-3b
Atom %																	Weight %
Area 1	S	Fe	Co														Area 1	S	Fe	Co
Py 1	68.22	31.78															Py 1	55.2	44.8
Py 2	68.11	27.95	3.94														Py 2	54.92	39.25	5.83
Ne-3b																	Ne-3b
Atom %																	Weight %
Area 2	O	Mg	S	Ca	Mn	Fe	Co	U									Area 2	O	Mg	S	Ca	Mn	Fe	Co	U
Py 1			68.01			31.99											Py 1			54.97			45.03
Py 2	9.97		61.28			28.74											Py 2	4.28		52.68			43.04
Py-rim	66.45	2.81	1.02	0.45	0.23	28.31	0.58	0.15									Py-rim	37.37	2.4	1.15	0.63	0.45	55.56	1.21	1.23
Ne-4																	Ne-4
Atom %																	Weight%
Area 2	O	Mg	S	Ca	Fe	Co	Ni										Area 2	O	Mg	S	Ca	Fe	Co	Ni
Py 1	13.76	0.17	58.3	0.01	27.55	0.16	0.05										Py 1	6.04	0.11	51.28	0.01	42.21	0.26	0.08
Py 2	3.4	0.22	52.6	0.05	41.88	0.15	1.65										Py 2	1.3	0.13	40.19	0.05	55.74	0.21	2.31
Ne-4																	Ne-4
Atom %																	Weight %
Area 4	S	Fe	Co	Ni	Cu	Zn	As										Area 4	S	Fe	Co	Ni	Cu	Zn	As
Py 1	67.58	31.81	0.26	0.2	0.05	0.05	0.06										Py 1	54.43	44.62	0.38	0.29	0.08	0.08	0.11
Py 2	67.37	31.97	0.25	0.17	0.1	0.09	0.04										Py 2	54.19	44.79	0.38	0.26	0.16	0.15	0.07
Py 3	67.1	31.33	1.06	0.04	0	0.05	0.41										Py 3	53.79	43.74	1.57	0.06	0	0.09	0.76
Py 4	67.3	31.03	1.1	0.07	0	0.08	0.43										Py 4	54	43.36	1.62	0.1	0	0.13	0.8
Py 5	67.61	32.02	0.12	0.04	0.02	0.16	0.03										Py 5	54.48	44.94	0.18	0.05	0.02	0.27	0.05
Py 6	49.58	13.96	17.46	0.65	0.07	0.05	18.24										Py 6	33.05	16.2	21.39	0.79	0.09	0.07	28.41
Rim (oxidized):	O	Mg	Al	Si	P	S	Ca	Fe	Co	Ni	Cu	U					Rim (oxidized):	O	Mg	Al	Si	P	S	Ca	Fe	Co	Ni	Cu	U
(Py 7)	63.67	0.49	0.13	0.71	0.39	0.05	0.15	33.83	0.28	0.17	0.01	0.09					(Py 7)	33.8	0.4	0.12	0.67	0.4	0.06	0.2	62.7	0.55	0.34	0.02	0.75
(Py 8)	63.45	0.46	0.12	0.75	0.39	0.09	0.17	34.14	0.19	0.11	0.01	0.12					(Py 8)	33.56	0.37	0.11	0.7	0.39	0.1	0.23	63.02	0.37	0.22	0.03	0.91
(Py 9)	65.37	1.01	0.14	0.72	0.44	4.35	0.08	27.26	0.24	0.1	0.28	0.03					(Py 9)	37.13	0.87	0.14	0.71	0.48	4.95	0.11	54.04	0.49	0.21	0.63	0.24
Ne-4																	Ne-4
Atom %																	Weight %
Area 6	S	Fe	Co	Cu	As												Area 6	S	Fe	Co	Cu	As
Py 1	67.77	32.03	0.18	0	0.02												Py 1	54.68	45.01	0.26	0	0.05
Py 2	66.42	28.72	3.46	0	1.4												Py 2	52.68	39.68	5.05	0	2.6
Py 3	67.5	31.42	0.8	0	0.27												Py 3	54.29	44.02	1.19	0	0.51
Py 4	67.74	32.02	0.21	0.03	0.01												Py 4	54.64	44.99	0.31	0.05	0.01
Ne-5	(thin section Ne-5a)																Ne-5	(thin section Ne-5a)
Atom %																	Weight %
Area 3	S	Fe	Ni	Zn													Area 3	S	Fe	Ni	Zn
Py 1	53.51	46.1	0.28	0.11													Py 1	39.78	59.68	0.38	0.17
Py 2	53.19	46.37	0.27	0.17													Py 2	39.46	59.92	0.37	0.25
Py 3	53.91	45.83	0.17	0.09													Py 3	40.16	59.47	0.23	0.13
Ne-5																	Ne-5
Atom %																	Weight %
Area 6	O	S	Ca	Fe	Cu												Area 6	O	S	Ca	Fe	Cu
Ccp 1		51.72	0.18	24.48	23.61												Ccp 1		36.58	0.16	30.16	33.1
Ccp 2		51.56		25.21	23.23												Ccp 2		36.44		31.03	32.53
Ccp 3		51.58	0.16	24.72	23.54												Ccp 3		36.46	0.14	30.43	32.97
Ccp 4	4.71	49.21	0.3	23.3	22.48												Ccp 4	1.71	35.9	0.27	29.61	32.5

## Sheet: (Ti-)Magnetite & Chromite
Ne-3b																	Ne-3b
Atom %																	Weight%
Area 5	O	Mg	Al	Si	Ca	Ti	V	Cr	Mn	Fe	Nb						Area 5	O	Mg	Al	Si	Ca	Ti	V	Cr	Mn	Fe	Nb
Ti-Mt 1	62.42				0.18	18.4	0.18		0.2	18.29	0.33						Ti-Mt 1	33.75				0.25	29.78	0.31		0.37	34.52	1.02
Ti-Mt 2	68.34	0.8	0.09	0.1	2.2	20.5	0.34	0.15		6.83	0.64						Ti-Mt 2	41.19	0.73	0.09	0.11	3.33	36.99	0.66	0.29		14.38	2.23
Ti-Mt 3	63.03				0.15	18.98	0.13		0.15	17.39	0.17						Ti-Mt 3	34.47				0.2	31.07	0.23		0.29	33.19	0.55
Ne-3b																	Ne-3b
Atom %																	Weight %
Area 9	O	Al	Ti	V	Cr	Fe	Zn										Area 9	O	Al	Ti	V	Cr	Fe	Zn
Chromite 1	54.3	6.01	0.5	2.38	15.84	20.01	0.96										Chromite 1	27.32	5.1	0.76	3.81	25.91	35.14	1.96
Ne-5a-1																	Ne-5a-1
	Atom %																	Weight %
Area 4	O	Na	Mg	Al	Ca	Ti	V	Cr	Fe								Area 4	O	Na	Mg	Al	Ca	Ti	V	Cr	Fe
Spektrum 91	53.92	0.35	0.25	5.78	0.23	0.47	2.67	15.78	20.55								Spektrum 91	27.22	0.25	0.19	4.92	0.29	0.72	4.3	25.89	36.22
