# Supplementary material
Source: Research Square preprint supplement (doi:10.21203/rs.3.rs-8133642/v1)
Supplement: Supplementary file 2 [file 62e0614d5e26599308727885.xlsx]

## Sheet: SIMS U-TH-PB Data monazite
Parameters:					Age (Ma)	Age (Ma)	Age (Ma)	Age (Ma)	Age (Ma)	Age (Ma)										Corr. Coeff.	Age (Ma)	Age (Ma)										Common	Common	Common
				Sample spot-ID	206Pb/238U	1se	207Pb/235U	1se	207Pb/206Pb	1se	rad. 206Pb (%)	206Pb*/238U	1se	238U/206Pb*	1se	207Pb*/235U	1se	207Pb*/206Pb*	1se	of Concordia	208Pb/232Th	1se	208Pb/232Th	1se	Th/PrPO2	204Pb/206Pb	1se	ThO2/Th	1se	UO/U	1se	206Pb/204Pb	207Pb/204Pb	208Pb/204Pb	Blocksize
Decay constants (1/Ma)																				Ellipses
238U	0.000155125
235U	0.00098485
232Th	4.9475e-05			#1	1629	103	1714	50.6	1820	52.2	99.9	0.2875	0.0206	3.47826	0.249225	4.41	0.269	0.1113	0.0032	0.9189	1606	44.81	0.08268	0.0024	1.307	0.001162	0.0004072	0.6914	0.01767	4.376	0.1541	0.85	0.71	1.75	6
				#2	1667	143	1667	78.7	1666	83.1	99.51	0.2952	0.0287	3.38753	0.329344	4.163	0.4	0.1023	0.00459	0.8923	1582	26.88	0.08143	0.001438	1.979	0.001763	0.0006181	0.8085	0.01791	4.428	0.1785	2.77	2.31	5.71	6
238U/235U	137.88			#3	1294	64.6	1405	43.6	1578	29.6	99.67	0.2224	0.0123	4.4964	0.248677	2.991	0.171	0.09754	0.00154	0.9612	1482	35.37	0.07606	0.001883	1.397	0.002155	0.0006676	0.7343	0.01939	4.502	0.09121	1.53	1.28	3.16	6
				#4	895	36.7	898.2	42.8	906.2	98.1	99.62	0.1489	0.00653	6.71592	0.294526	1.422	0.102	0.06925	0.0033	0.7638	903.3	17.66	0.0457	0.0009136	1.261	0.002227	0.0006511	0.6961	0.008023	4.365	0.0964	1.72	1.43	3.54	6
Standard :	Age (Ma)	(N analyses)		#5	969.9	51	978	28.4	996.3	67.8	99.7	0.1624	0.0092	6.15764	0.348832	1.62	0.0732	0.07237	0.00242	0.8079	900.9	22	0.04558	0.001138	1.427	0.001748	0.0006087	0.7095	0.01449	4.245	0.09021	1.74	1.46	3.6	6
554	45	5		#6	952	54.9	947	51.1	935.4	72.5	99.86	0.1591	0.00987	6.28536	0.389921	1.541	0.128	0.07024	0.00248	0.9212	913	35.4	0.0462	0.001832	1.398	0.001136	0.0004094	0.7006	0.02068	4.308	0.1222	1.21	1.01	2.51	6
44069	424.9	10		#7	917.2	39	938.8	30.4	989.7	71.2	99.85	0.1529	0.00697	6.54022	0.298138	1.521	0.0754	0.07213	0.00252	0.7329	895.5	19.18	0.0453	0.0009918	1.362	0.0008131	0.0003678	0.7556	0.008485	4.522	0.06236	1.86	1.55	3.84	6
				#8	902.2	53.2	907.2	51.5	919.4	92.5	99.75	0.1502	0.00949	6.65779	0.420655	1.444	0.124	0.0697	0.00313	0.8614	908.2	23	0.04596	0.00119	1.366	0.001358	0.0004264	0.7396	0.01578	4.473	0.1445	1.87	1.56	3.87	6
				#9	917.5	42.9	921.7	30.9	931.8	60.9	99.73	0.153	0.00768	6.53595	0.328079	1.479	0.0755	0.07012	0.00208	0.8285	916.3	17.86	0.04638	0.0009246	1.44	0.001708	0.0004715	0.7273	0.01563	4.468	0.1332	1.59	1.32	3.27	6
Two-point Linear Drift Correction				#10	1019	56.9	966.5	37.6	849.4	73.8	99.78	0.1712	0.0103	5.84112	0.351423	1.59	0.0959	0.06737	0.00239	0.827	915.3	24.64	0.04632	0.001275	1.477	0.001212	0.0003834	0.716	0.01858	4.214	0.08461	1.79	1.5	3.7	6
				#11	920.8	50.2	929	47	948.3	79.8	99.87	0.1535	0.00898	6.51466	0.381118	1.496	0.115	0.07068	0.00276	0.8702	892.4	23.73	0.04514	0.001227	1.575	0.001184	0.000386	0.7212	0.01591	4.407	0.1314	1.09	0.91	2.25	6
				#12	908.4	48.8	899.2	43.3	876.7	60.1	99.88	0.1513	0.00872	6.60939	0.380924	1.424	0.103	0.06827	0.00198	0.9258	886.9	17.32	0.04485	0.0008952	1.418	0.001098	0.0003575	0.746	0.0123	4.465	0.1117	1.1	0.92	2.28	6
				#13	917.2	47.1	910.6	40.7	894.7	83.8	100	0.1529	0.00843	6.54022	0.360589	1.452	0.0983	0.06886	0.00279	0.8007	902	19.48	0.04564	0.001008	1.722	0.0003171	0.000183	0.7146	0.01127	4.416	0.08516	0.01	0.01	0.01	6
				#14	940.2	42.4	972.7	31.2	1047	58.7	99.92	0.157	0.0076	6.36943	0.308329	1.606	0.0802	0.07419	0.00216	0.8253	901.6	20.88	0.04562	0.00108	2.106	0.000407	0.0001966	0.7022	0.01478	4.352	0.06916	2.04	1.71	4.22	6
				#15	933.1	47.4	920.5	47.8	890.4	74.2	99.8	0.1558	0.00851	6.41849	0.350586	1.476	0.117	0.06872	0.00247	0.9196	926.1	20.84	0.04689	0.001079	2.034	0.0009543	0.0003234	0.7216	0.007149	4.346	0.09412	2.09	1.74	4.31	6
				#16	1250	105	1112	60.8	849.4	72	99.83	0.214	0.0197	4.6729	0.430169	1.988	0.179	0.06738	0.00233	0.9279	1018	29	0.05167	0.001509	2.658	0.001083	0.0004533	0.4675	0.006952	3.408	0.04472	1.56	1.31	3.23	6
				#17	887.7	35.9	903.5	31.7	942.5	65.7	99.77	0.1476	0.00639	6.77507	0.293311	1.435	0.0761	0.07048	0.00226	0.7968	845.9	14.6	0.04274	0.0007531	1.96	0.001003	0.0003295	0.8164	0.01372	4.614	0.05609	2.3	1.92	4.75	6
				#18	960.6	52.6	1008	32.2	1114	64.3	99.85	0.1607	0.00946	6.22278	0.366319	1.7	0.0857	0.07672	0.00247	0.8376	982	29.3	0.04978	0.001522	1.863	0.0007215	0.0002647	0.736	0.01781	4.474	0.1108	2.02	1.69	4.17	6
				#19	1024	53.1	1002	38.4	953.2	38.6	99.89	0.1722	0.00966	5.8072	0.32577	1.682	0.101	0.07085	0.00134	0.95	919.6	20.4	0.04655	0.001056	1.529	0.0006724	0.0002421	0.6924	0.01866	4.172	0.07438	1.66	1.39	3.43	6
				#20	998.1	42	978.3	40.7	934.1	111	99.78	0.1675	0.00761	5.97015	0.271241	1.621	0.105	0.0702	0.0038	0.5666	908.7	20.45	0.04598	0.001058	1.342	0.001243	0.0003852	0.715	0.01263	4.262	0.07388	1.79	1.49	3.69	6
				#21	974.5	53.9	957.2	37.9	917.6	32.4	99.77	0.1632	0.00973	6.12745	0.365319	1.567	0.0959	0.06963	0.0011	0.9664	903.3	26.87	0.0457	0.00139	1.492	0.001242	0.0004045	0.7152	0.01297	4.226	0.115	1.82	1.52	3.76	6
				#22	948.9	46.2	952.2	44.8	959.9	67	99.84	0.1586	0.0083	6.30517	0.329968	1.554	0.113	0.07109	0.00233	0.9115	908.4	20.17	0.04597	0.001044	1.353	0.0008472	0.0002997	0.7769	0.01175	4.501	0.09983	1.9	1.59	3.92	6
				#23	1114	58.9	1079	42.7	1009	76.1	99.86	0.1886	0.0109	5.30223	0.306438	1.894	0.122	0.07282	0.00273	0.8154	1125	21.44	0.05726	0.001121	1.511	0.001518	0.0004439	0.682	0.01516	4.16	0.08009	0.94	0.78	1.93	6
				#24	920	38.1	929.3	34.3	951.5	69.8	99.77	0.1534	0.00681	6.5189	0.289399	1.497	0.0845	0.0708	0.00241	0.7966	877.9	16.2	0.04439	0.0008373	1.319	0.00127	0.0003883	0.7202	0.01584	4.378	0.06543	1.79	1.49	3.69	6

## Sheet: Monazite Figures Spots
	Overview monazite assemblage (spots 1-12, 20-24)				(blue: monazite; purple: apatite; bright green: magnesite; brown: dolomite
	monazite spots 1-5, 20-24		(dark: carbonates; medium grey: apatite; light grey: sulfide)						monazite spots 6-12		(dark: carbonates; medium grey: apatite; light grey: sulfide)							monazite (white)-columbite (grey) assemblage within dol-mgs (dark)

## Sheet: SIMS U-TH-PB Data zircon
Parameters:					Age (Ma)	Age (Ma)	Age (Ma)	Age (Ma)	Age (Ma)	Age (Ma)												Corr. Coeff.			U/		Common	Common	Common
				Sample spot-ID	206Pb/238U	1se	207Pb/235U	1se	207Pb/206Pb	1se	rad. 206Pb (%)	206Pb*/238U	1se	207Pb*/235U	1se	207Pb*/206Pb*	1se	207Pb/235U	1se	206Pb/238U	1se	of Concordia	Th/U	1se	U/94Zr2O	1se	206Pb/204Pb	207Pb/204Pb	208Pb/204Pb	Blocksize
Decay constants (1/Ma)																						Ellipses
238U	0.000155125
235U	0.00098485			#1	137.1	3.77	223.5	5.55	1272	17	97.97	0.02149	0.000598	0.2462	0.00681	0.0831	0.000725	0.250805	0.00693738	0.0219353	0.000610391	0.9505	0.008828	9.622e-05	101	1.497	15.16	15.19	34.8	6
232Th	4.9475e-05			#2	115.9	3.14	192.8	5.03	1283	22.4	98.1	0.01814	0.000496	0.2091	0.00598	0.08357	0.000961	0.212729	0.00608378	0.0184913	0.000505607	0.9166	0.01305	0.000229	101.1	3.459	15.16	15.19	34.8	6
				#3	104.1	2.77	176.4	4.68	1305	19.5	98.05	0.01628	0.000436	0.1897	0.00548	0.08453	0.000848	0.193091	0.00557795	0.0166038	0.000444671	0.9379	0.01062	0.0001375	103.7	7.128	15.16	15.19	34.8	6
238U/235U	137.88			#4	114.1	3.29	188.4	5.39	1263	21.7	98	0.01786	0.00052	0.2038	0.00639	0.08275	0.000921	0.207548	0.00650753	0.0182245	0.000530612	0.9348	0.009604	0.0001108	91.23	3.026	15.16	15.19	34.8	6
				#5	107.8	2.86	184.1	4.62	1326	16.1	97.99	0.01687	0.000451	0.1988	0.00545	0.08547	0.000712	0.202477	0.00555081	0.017216	0.000460251	0.9531	0.009678	0.0001284	135.4	2.971	15.16	15.19	34.8	6
Standard :	Age (Ma)	(N analyses)
91500	1065	1
AS3	1099.1	12
Two-point Linear Drift Correction

## Sheet: Zircon Figure spots
Newania Ne-5: metamict zircon grain with numbered spot positions (15 µm diameter)														Same without spots:
