# Supplementary material
Source: Research Square preprint supplement (doi:10.21203/rs.3.rs-8133642/v1)

# Ne-5b-1

Title: "New insights into formation of the dolomite – magnesite – siderite series in the Newania carbonatite complex, India: Mineralogy, petrology and in situ SIMS analyses (REE, d13C, d18O, U-Th-Pb ages)".  
 Journal: Mineralogy and Petrology.  
 Authors: Jens Hopp\*, Shrinivas G. Viladkar, Axel K. Schmitt, Andreas T. Hertwig, Alexander Varychev.  
 Corresponding author\*: Institute of Earth Sciences, Heidelberg University, Im Neuenheimer Feld 234-236, D-69120 Heidelberg, Germany. Email: jens.hopp@geow.uni-heidelberg.de

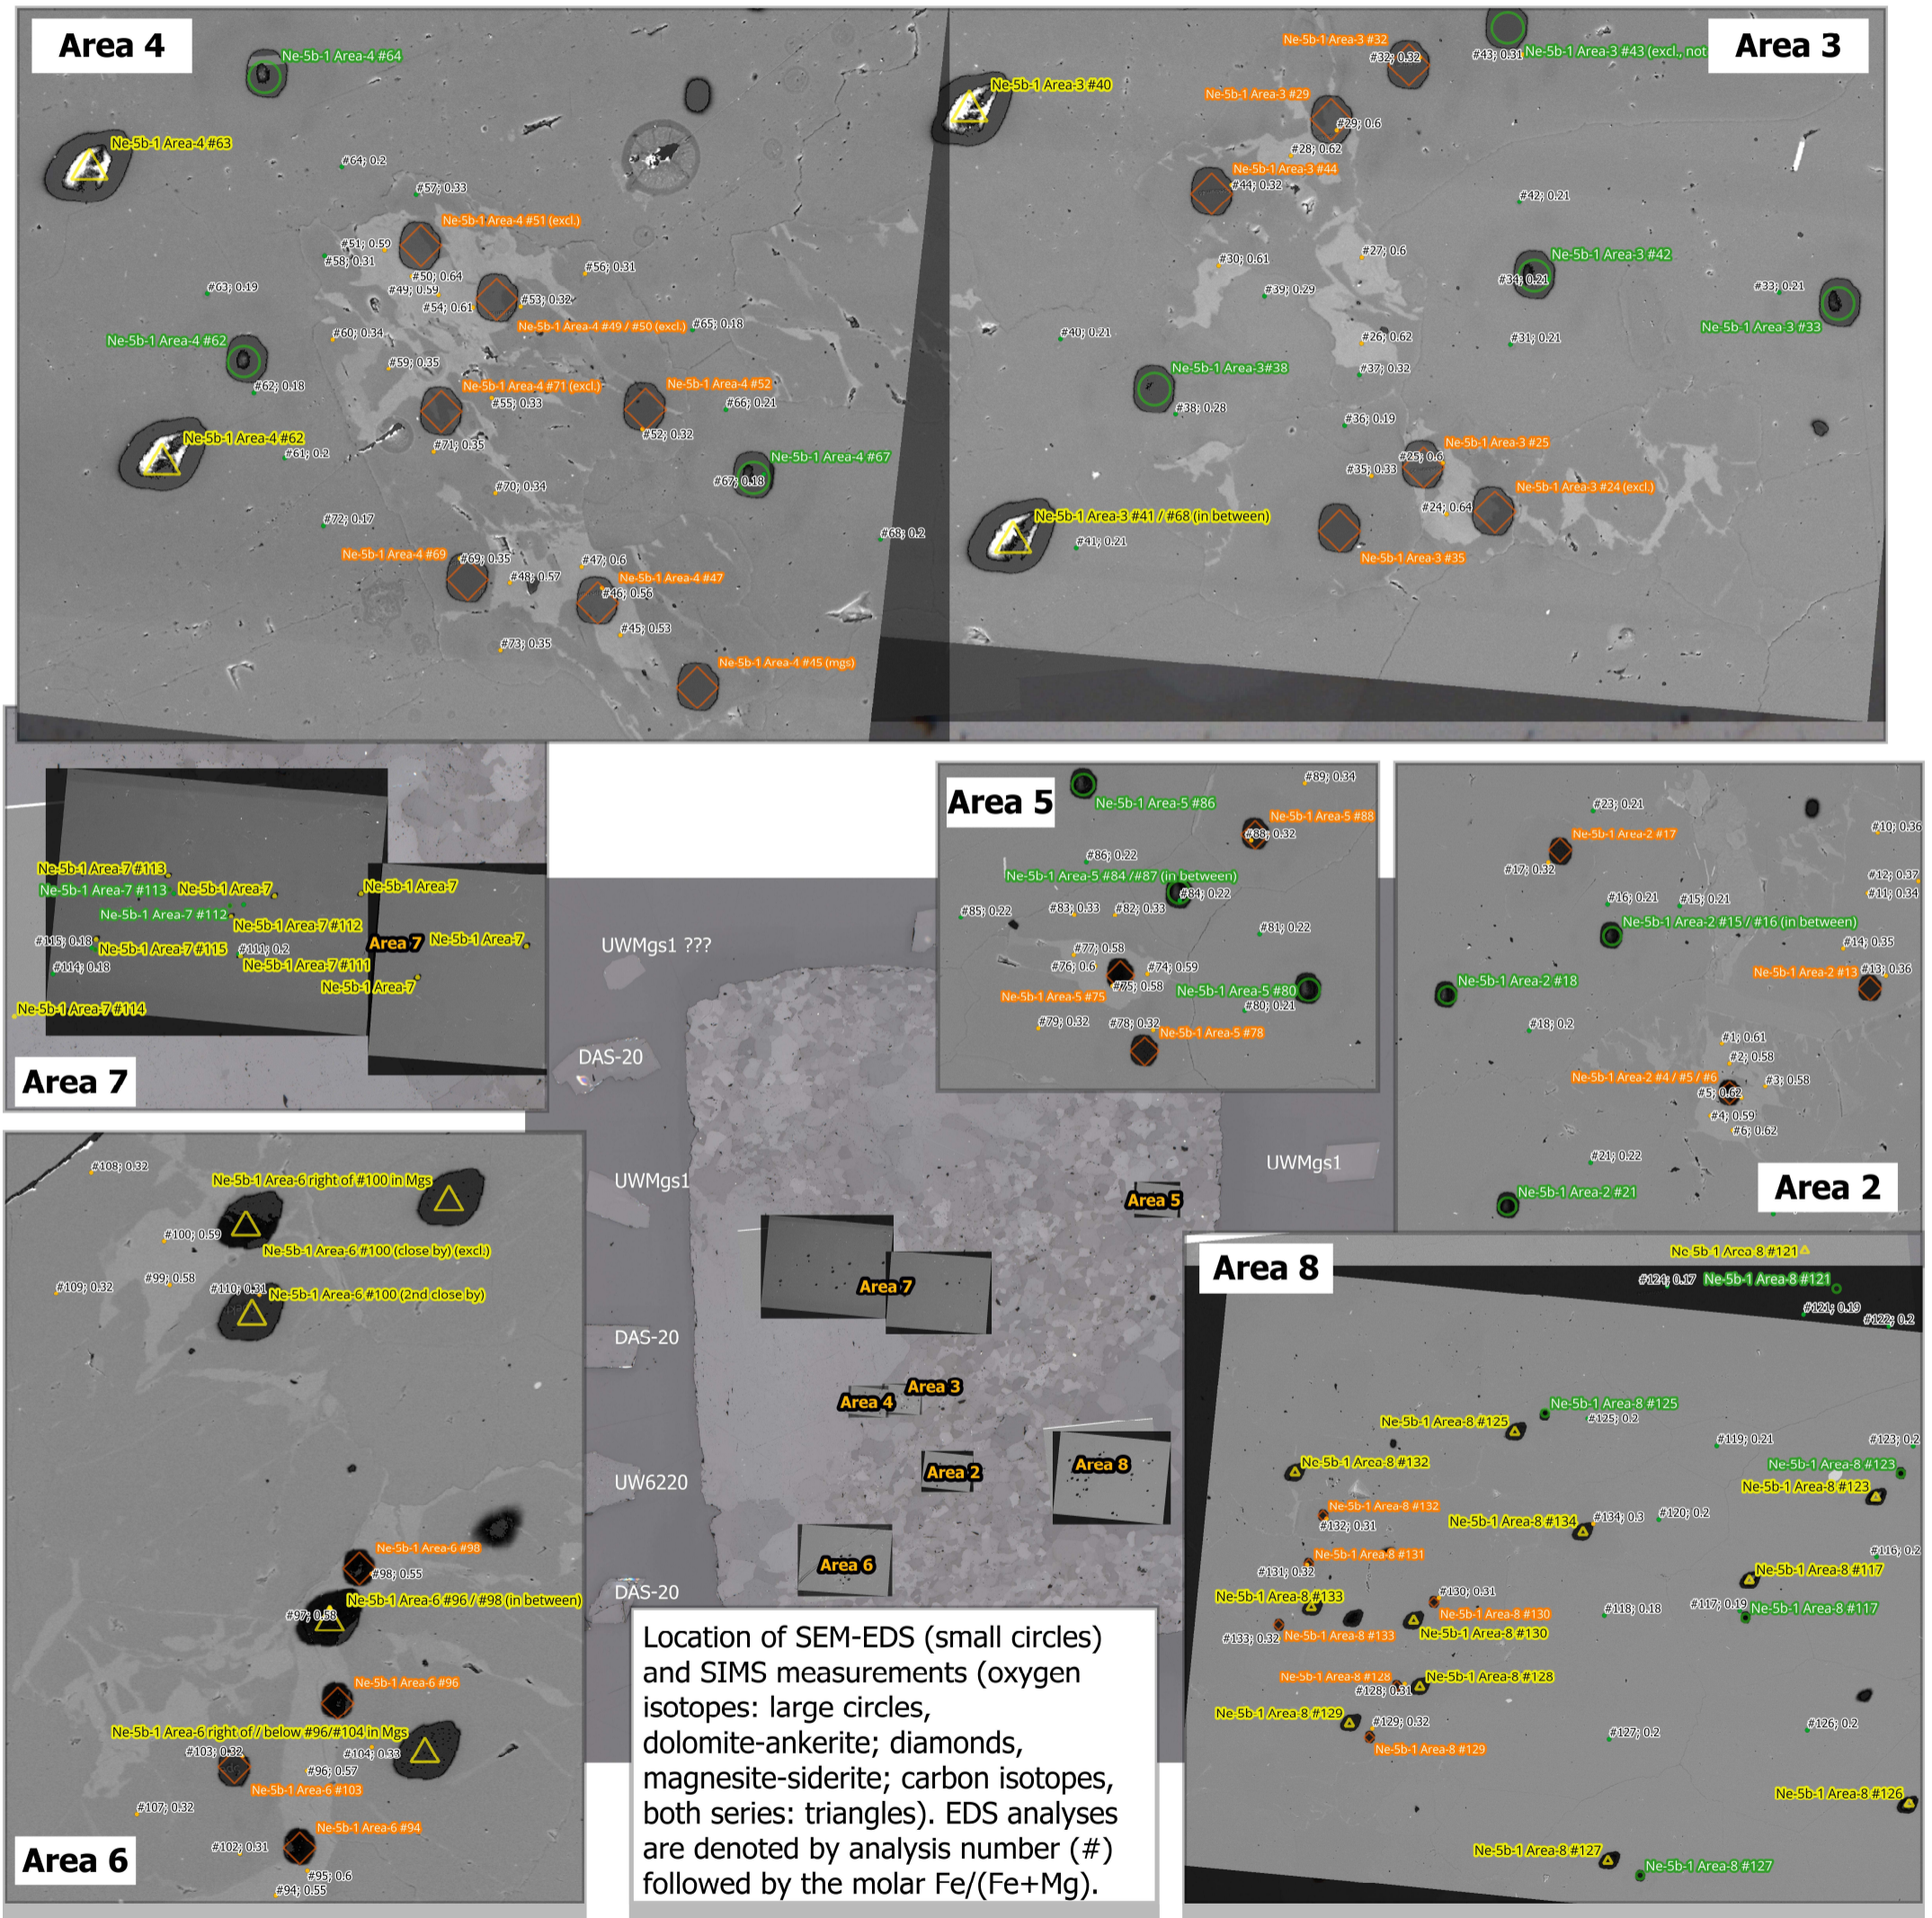

Supplement: Supplementary file 2 [file c94118d6f87ff68e693174fe.pdf]
