# Supplementary material
Source: Research Square preprint supplement (doi:10.21203/rs.3.rs-8133642/v1)
Supplement: Supplementary file 3 [file 64b63c4e9b82f12e75090b42.xlsx]

## Sheet: Normalizations
REE- Patterns:
	CI: Sun & McDonough 1995		CI :Pourmand et al 2012		PAAS :Pourmand et al 2012		PAAS / CI (Pourmand)
	ppm		ppm		ppm
La			0.2469		44.56		180.478
Ce			0.6321		88.25		139.614
Pr			0.0959		10.15		105.839
Nd			0.4854		37.32		76.885
Pm
Sm			0.1556		6.884		44.2416
Eu			0.0599		1.215		20.2838
Gd			0.2093		6.043		28.8724
Tb			0.0378		0.8914		23.582
Dy			0.2577		5.325		20.6636
Ho			0.0554		1.052		18.9892
Er			0.1667		3.075		18.4463
Tm			0.0261		0.451		17.2797
Yb			0.1694		3.012		17.7804
Lu			0.0256		0.4386		17.1328
Eu/Eu* :							0.567534

## Sheet: Newania, this study
REE- Patterns:
SIMS-data 3f (concentrations) :
	Ne-4a														(dreckig?)
	AB -1												AB -2		AB-3
	-1, mgs	-2, dol	-3, mgs	-4, mgs	-4b, mgs	-5, mgs	-5b, mgs	-6, dol	-7, dol	-8, dol	-9, sd	-9b, sd	-10, dol	-11, dol	-12, mgs	-12b, mgs
La	0.08	15.78	0.07	0.06	0.01	0.06	0.01	16.68	25.15	21.46	0.22	0.19	19.4	16.53	0.02	0
Ce	0.06	41.75	0.05	0.08	0.03	0.11	0.03	44.2	63.39	53.44	0.39	0.42	44.8	42.72	0.03	0.01
Pr	0.03	5.21	0.01	0.01	0.01	0.01	0.01	5.42	8.3	7.02	0.04	0.11	5.36	5.45	0.01	0
Nd	0.09	20.97	0.04	0.12	0.08	0.09	0.05	23.35	33.54	29.15	0.37	0.33	22.9	23.82	0.02	0.04
Pm
Sm	0.09	4.47	0.05	0.09	0.11	0.05	0.02	4.46	6.02	5.46	0.12	0.09	4.39	5.17	0.01	0.03
Eu	0.06	2.68	0.03	0.02	0.02	0.01	0.02	2.41	2.95	2.91	0	0	2.38	2.78	0.01	0.01
Gd	0.15	2.64	0.12	0.16	0.18	0.08	0.15	2.16	3.24	3.11	0.15	0.18	2.53	3.17	0.08	0.07
Tb	0.01	0.28	0.03	0.04	0.04	0.02	0.02	0.29	0.33	0.35	0.02	0.03	0.24	0.3	0.01	0.02
Dy	0.16	1.28	0.26	0.25	0.14	0.28	0.12	1.14	1.62	1.45	0.25	0.23	1.35	1.28	0.11	0.09
Ho	0.04	0.17	0.07	0.06	0.08	0.05	0.07	0.16	0.17	0.22	0.09	0.09	0.21	0.17	0.02	0.03
Er	0.06	0.28	0.2	0.19	0.22	0.15	0.15	0.34	0.31	0.31	0.36	0.37	0.21	0.36	0.13	0.08
Tm	0.02	0.05	0.04	0.06	0.03	0.04	0.06	0.03	0.04	0.03	0.09	0.08	0.04	0.06	0.02	0.02
Yb	0.32	0.17	0.32	0.43	0.41	0.44	0.59	0.26	0.24	0.31	0.38	0.54	0.19	0.19	0.2	0.16
Lu	0.03	0.03	0.06	0.06	0.05	0.08	0.09	0.02	0.02	0.02	0.19	0.13	0.03	0.04	0.03	0.03
Ba	0.3	1.448	0.22	0.22	0.03	0.38	0.09	1.66	1.82	1.53	4.12	7.05	2.82	1.03	0.32	0.07
	Ne-4b
	AB -1
	-1, dol	-2, dol	-3, dol	-4, sd	-5, mgs	-5b, mgs
La	13.01	13.97	19.82	0.36	0.8	0.53
Ce	28.29	29.37	39.52	0.59	1.29	1.07
Pr	3.41	3.43	4.68	0.07	0.14	0.11
Nd	13.66	13.32	17.68	0.34	0.65	0.6
Pm
Sm	3.17	2.9	3.59	0.06	0.17	0.1
Eu	1.91	1.81	2.05	0.02	0.04	0.01
Gd	2.03	1.85	2.46	0.13	0.09	0.02
Tb	0.18	0.18	0.21	0.03	0.02	0.06
Dy	1	0.79	1.2	0.28	0.32	0.44
Ho	0.15	0.12	0.17	0.05	0.04	0.12
Er	0.14	0.13	0.25	0.4	0.48	0.46
Tm	0.02	0.03	0.01	0.03	0.03	0.08
Yb	0.21	0.09	0.06	0.56	0.63	1.43
Lu	0.03	0.01	0.02	0.07	0.14	0.22
Ba	3.24	1.02	1.33	8.3	11.78	8.21
	Ne-5a
	AB -1			AB -2				AB -3		AB -4
	-1, dol	-2, dol	-3, ap	-4, ap	-5, sd	-7, (sd-dol)	-8, (sd-dol)	-9, mgs	-9a, mgs	-10b, mgs
La	8.2	9.37	291.71	296.47	0.9	0.04	0.44	0.03	0.01	0.01
Ce	17.46	19.6	687.61	690.7	2.49	0.14	0.99	0.03	0	0
Pr	2.19	2.41	90.25	91.23	0.49	0.02	0.14	0	0	0
Nd	9.22	10.33	398.4	397.68	2.2	0.16	0.88	0.01	0.01	0.03
Pm
Sm	2.34	2.31	104.74	105.77	0.93	0.07	0.28	0.01	0.03	0.02
Eu	1.47	1.5	32.04	32.74	0.15	0.03	0.07	0.01	0.01	0.03
Gd	1.71	1.48	105.15	105.46	0.8	0.09	0.27	0.05	0.03	0.05
Tb	0.18	0.16	10.69	10.92	0.14	0.01	0.04	0.02	0.02	0.01
Dy	0.99	1.12	40.87	42.24	1.28	0.09	0.15	0.13	0.08	0.06
Ho	0.13	0.13	4.39	4.46	0.27	0.02	0.03	0.03	0.04	0.02
Er	0.31	0.14	8.19	8	0.78	0.02	0.02	0.18	0.1	0.02
Tm	0.03	0.02	0.79	0.8	0.18	0	0.01	0.03	0.03	0.01
Yb	0.38	0.23	1.48	1.6	1.29	0.02	0.06	0.26	0.2	0.14
Lu	0.04	0.05	0.21	0.14	0.12	0.01	0	0.06	0.05	0.02
Ba	1.75	3.07	3.66	3.9	2.89	0.27	0.36	0.27	0.03	0.04
	AVERAGE COMPOSITIONS:
	Dolomite	1s	Magnesite	1s	Siderite	1s	Dol-Pseudomorphs	1s	Apatite	1s
La	16.3064	5.07251	0.09	0.180396	0.4175	0.330088	0.24	0.282843	294.09	3.36583
Ce	38.5945	13.8986	0.15625	0.369862	0.9725	1.01549	0.565	0.601041	689.155	2.18496
Pr	4.80727	1.86585	0.02125	0.0372012	0.1775	0.210297	0.08	0.0848528	90.74	0.692965
Nd	19.8127	7.75727	0.1175	0.196669	0.81	0.926823	0.52	0.509117	398.04	0.509117
Sm	4.02545	1.25845	0.05625	0.0377728	0.3	0.420714	0.175	0.148492	105.255	0.72832
Eu	2.25909	0.543423	0.02375	0.0168502	0.0425	0.0722842	0.05	0.0282843	32.39	0.494975
Gd	2.39818	0.60829	0.09625	0.0613974	0.315	0.323986	0.18	0.127279	105.305	0.219203
Tb	0.245455	0.0675816	0.02625	0.0168502	0.055	0.0568624	0.025	0.0212132	10.805	0.162635
Dy	1.20182	0.231595	0.16875	0.125975	0.51	0.513744	0.12	0.0424264	41.555	0.968736
Ho	0.163636	0.031392	0.05875	0.0327054	0.125	0.0984886	0.025	0.00707107	4.425	0.0494975
Er	0.252727	0.0848635	0.16125	0.138815	0.4775	0.202382	0.02	0	8.095	0.13435
Tm	0.0327273	0.0142063	0.03625	0.0232609	0.095	0.06245	0.005	0.00707107	0.795	0.00707107
Yb	0.211818	0.0905338	0.44625	0.423925	0.6925	0.406397	0.04	0.0282843	1.54	0.0848528
Lu	0.0281818	0.0116775	0.06875	0.0649038	0.1275	0.0492443	0.005	0.00707107	0.175	0.0494975
Ba	1.88345	0.793208	1.12375	2.86497	5.59	2.51175	0.315	0.0636396	3.78	0.169706
Sum REE (ppm)	90.34	16.8784	1.5275	0.660184	5.1175	1.67926	2.05	0.865968	1782.37	4.31982
	AVERAGE COMPOSITIONS Ne-4:						AVERAGE COMPOSITIONS Ne-5:
	Dolomite	Magnesite	Siderite	Dol-Pseudomorphs	Apatite		Dolomite	Magnesite	Siderite	Dol-Pseudomorphs	Apatite
La	17.9778	0.116667	0.256667	---			8.785	0.01	0.9	0.24	294.09
Ce	43.0533	0.208333	0.466667				18.53	0	2.49	0.565	689.155
Pr	5.36444	0.0283333	0.0733333				2.3	0	0.49	0.08	90.74
Nd	22.0433	0.15	0.346667				9.775	0.02	2.2	0.52	398.04
Sm	4.40333	0.0666667	0.09				2.325	0.025	0.93	0.175	105.255
Eu	2.43111	0.025	0.00666667				1.485	0.02	0.15	0.05	32.39
Gd	2.57667	0.115	0.153333				1.595	0.04	0.8	0.18	105.305
Tb	0.262222	0.03	0.0266667				0.17	0.015	0.14	0.025	10.805
Dy	1.23444	0.201667	0.253333				1.055	0.07	1.28	0.12	41.555
Ho	0.171111	0.0683333	0.0766667				0.13	0.03	0.27	0.025	4.425
Er	0.258889	0.195	0.376667				0.225	0.06	0.78	0.02	8.095
Tm	0.0344444	0.0416667	0.0666667				0.025	0.02	0.18	0.005	0.795
Yb	0.191111	0.538333	0.493333				0.305	0.17	1.29	0.04	1.54
Lu	0.0244444	0.08	0.13				0.045	0.035	0.12	0.005	0.175
Ba	1.76644	1.48667	6.49				2.41	0.035	2.89	0.315	3.78
Sum REE (ppm)	100.027	1.865	2.81667				46.75	0.515	12.02	2.05	1782.37

## Sheet: SIMS Spots
Title: "New insights into formation of the dolomite – magnesite – siderite series in the Newania carbonatite complex, India: Mineralogy, petrology and in situ SIMS analyses (REE, d13C, d18O, U-Th-Pb ages)". Journal: Mineralogy and Petrology.
Authors: Jens Hopp*, Shrinivas G. Viladkar, Axel K. Schmitt, Andreas T. Hertwig, Alexander Varychev. Corresponding author*: Institute of Earth Sciences, Heidelberg University, Im Neuenheimer Feld 234-236, D-69120 Heidelberg, Germany. Email: jens.hopp@geow.uni-heidelberg.de
			NE-4a										NE-4b								NE-5a

## Sheet: Newania-normalized
REE- Patterns:
				SIMS-Daten 3f :
Normalisierung				Ne-4a
(nach Pourmand et al. 2012)				AB -1												AB -2		AB-3
				-1, mgs	-2, dol	-3, mgs	-4, mgs	-4b, mgs	-5, mgs	-5b, mgs	-6, dol	-7, dol	-8, dol	-9, sd	-9b, sd	-10, dol	-11, dol	-12, mgs	-12b, mgs
La	0.2469		La	0.324018	63.9125	0.283516	0.243013	0.0405022	0.243013	0.0405022	67.5577	101.863	86.9178	0.891049	0.769542	78.5743	66.9502	0.0810045	0							0.324018	63.9125	0.283516	0.243013	0.0405022	0.243013	0.0405022	67.5577	101.863	86.9178	0.891049	0.769542	78.5743	66.9502	0.0810045	0	52.6934	56.5816	80.2754	1.45808	3.24018	2.14662	33.2118	37.9506
Ce	0.6321		Ce	0.0949217	66.0497	0.0791014	0.126562	0.0474608	0.174023	0.0474608	69.9256	100.285	84.5436	0.616991	0.664452	70.8749	67.5842	0.0474608	0.0158203							0.171527	63.6869	0.150086	0.095736	0.0167343	0.0935601	0.0116289	44.0165	71.8984	47.4964	0.39722	0.241408	70.0552	59.6914	0.0686108	0	42.506	106.499	226.644	0.441069	0.871248	0.254292	14.8055	27.9514
Pr	0.0959		Pr	0.312826	54.3274	0.104275	0.104275	0.104275	0.104275	0.104275	56.5172	86.5485	73.2013	0.417101	1.14703	55.8916	56.83	0.104275	0
Nd	0.4854		Nd	0.185414	43.2015	0.0824063	0.247219	0.164813	0.185414	0.103008	48.1047	69.0977	60.0536	0.762258	0.679852	47.1776	49.0729	0.0412031	0.0824063
Pm			Pm
Sm	0.1556		Sm	0.578406	28.7275	0.321337	0.578406	0.706941	0.321337	0.128535	28.6632	38.6889	35.09	0.771208	0.578406	28.2134	33.2262	0.0642674	0.192802
Eu	0.0599		Eu	1.00167	44.7412	0.500835	0.33389	0.33389	0.166945	0.33389	40.2337	49.2487	48.581	0	0	39.7329	46.4107	0.166945	0.166945
Gd	0.2093		Gd	0.716675	12.6135	0.57334	0.764453	0.86001	0.382226	0.716675	10.3201	15.4802	14.8591	0.716675	0.86001	12.0879	15.1457	0.382226	0.334448
Tb	0.0378		Tb	0.26455	7.40741	0.793651	1.0582	1.0582	0.529101	0.529101	7.67196	8.73016	9.25926	0.529101	0.793651	6.34921	7.93651	0.26455	0.529101
Dy	0.2577		Dy	0.620877	4.96702	1.00893	0.97012	0.543267	1.08653	0.465658	4.42375	6.28638	5.6267	0.97012	0.892511	5.23865	4.96702	0.426853	0.349243
Ho	0.0554		Ho	0.722022	3.06859	1.26354	1.08303	1.44404	0.902527	1.26354	2.88809	3.06859	3.97112	1.62455	1.62455	3.79061	3.06859	0.361011	0.541516
Er	0.1667		Er	0.359928	1.67966	1.19976	1.13977	1.31974	0.89982	0.89982	2.03959	1.85963	1.85963	2.15957	2.21956	1.25975	2.15957	0.779844	0.479904
Tm	0.0261		Tm	0.766284	1.91571	1.53257	2.29885	1.14943	1.53257	2.29885	1.14943	1.53257	1.14943	3.44828	3.06513	1.53257	2.29885	0.766284	0.766284
Yb	0.1694		Yb	1.88902	1.00354	1.88902	2.53837	2.42031	2.5974	3.48288	1.53483	1.41677	1.82999	2.24321	3.18772	1.12161	1.12161	1.18064	0.94451
Lu	0.0256		Lu	1.17188	1.17188	2.34375	2.34375	1.95312	3.125	3.51562	0.78125	0.78125	0.78125	7.42188	5.07812	1.17188	1.5625	1.17188	1.17188
			Eu/Eu* =	1.55578	2.3504	1.16683	0.502124	0.428213	0.476357	1.1001	2.3393	2.0124	2.12755	0	0	2.15153	2.06887	1.06517	0.657435
			La/Sm =	0.560191	2.22478	0.882301	0.420143	0.0572922	0.756258	0.315107	2.35695	2.63287	2.477	1.15539	1.33045	2.785	2.01498	1.26043	0
			La/Yb =	0.171527	63.6869	0.150086	0.095736	0.0167343	0.0935601	0.0116289	44.0165	71.8984	47.4964	0.39722	0.241408	70.0552	59.6914	0.0686108	0
				Ne-4b
				AB -1
				-1, dol	-2, dol	-3, dol	-4, sd	-5, mgs	-5b, mgs
La	0.2469		La	52.6934	56.5816	80.2754	1.45808	3.24018	2.14662
Ce	0.6321		Ce	44.7556	46.4642	62.5218	0.933397	2.04082	1.69277
Pr	0.0959		Pr	35.5579	35.7664	48.8008	0.729927	1.45985	1.14703
Nd	0.4854		Nd	28.1417	27.4413	36.4236	0.700453	1.3391	1.23609
Pm			Pm
Sm	0.1556		Sm	20.3728	18.6375	23.072	0.385604	1.09254	0.642674
Eu	0.0599		Eu	31.8865	30.217	34.2237	0.33389	0.66778	0.166945
Gd	0.2093		Gd	9.699	8.83899	11.7535	0.621118	0.430005	0.0955566
Tb	0.0378		Tb	4.7619	4.7619	5.55556	0.793651	0.529101	1.5873
Dy	0.2577		Dy	3.88048	3.06558	4.65658	1.08653	1.24175	1.70741
Ho	0.0554		Ho	2.70758	2.16606	3.06859	0.902527	0.722022	2.16606
Er	0.1667		Er	0.839832	0.779844	1.4997	2.39952	2.87942	2.75945
Tm	0.0261		Tm	0.766284	1.14943	0.383142	1.14943	1.14943	3.06513
Yb	0.1694		Yb	1.23967	0.531287	0.354191	3.30579	3.71901	8.44156
Lu	0.0256		Lu	1.17188	0.390625	0.78125	2.73438	5.46875	8.59375
			Eu/Eu* =	2.26839	2.35427	2.07827	0.682253	0.974264	0.673671
			La/Sm =	2.58646	3.0359	3.47935	3.78129	2.96572	3.34014
			La/Yb =	42.506	106.499	226.644	0.441069	0.871248	0.254292
				Ne-5a
				AB -1			AB -2				AB -3		AB -4
				-1, dol	-2, dol	-3, ap	-4, ap	-5, sd	-7, (sd-dol)	-8, (sd-dol)	-9, mgs	-9a, mgs	-10b, mgs
La	0.2469		La	33.2118	37.9506	1181.49	1200.77	3.6452	0.162009	1.7821	0.121507	0.0405022	0.0405022
Ce	0.6321		Ce	27.6222	31.0078	1087.82	1092.71	3.93925	0.221484	1.56621	0.0474608	0	0
Pr	0.0959		Pr	22.8363	25.1303	941.084	951.303	5.10949	0.208551	1.45985	0	0	0
Nd	0.4854		Nd	18.9946	21.2814	820.766	819.283	4.53234	0.329625	1.81294	0.0206016	0.0206016	0.0618047
Pm			Pm
Sm	0.1556		Sm	15.0386	14.8458	673.136	679.756	5.97686	0.449871	1.79949	0.0642674	0.192802	0.128535
Eu	0.0599		Eu	24.5409	25.0417	534.891	546.578	2.50417	0.500835	1.16861	0.166945	0.166945	0.500835
Gd	0.2093		Gd	8.17009	7.07119	502.389	503.87	3.82226	0.430005	1.29001	0.238892	0.143335	0.238892
Tb	0.0378		Tb	4.7619	4.2328	282.804	288.889	3.7037	0.26455	1.0582	0.529101	0.529101	0.26455
Dy	0.2577		Dy	3.84168	4.34614	158.595	163.912	4.96702	0.349243	0.582072	0.504463	0.310438	0.232829
Ho	0.0554		Ho	2.34657	2.34657	79.2419	80.5054	4.87365	0.361011	0.541516	0.541516	0.722022	0.361011
Er	0.1667		Er	1.85963	0.839832	49.1302	47.9904	4.67906	0.119976	0.119976	1.07978	0.59988	0.119976
Tm	0.0261		Tm	1.14943	0.766284	30.2682	30.6513	6.89655	0	0.383142	1.14943	1.14943	0.383142
Yb	0.1694		Yb	2.24321	1.35773	8.73672	9.4451	7.61511	0.118064	0.354191	1.53483	1.18064	0.826446
Lu	0.0256		Lu	1.5625	1.95312	8.20312	5.46875	4.6875	0.390625	0	2.34375	1.95312	0.78125
			Eu/Eu* =	2.21398	2.44409	0.919802	0.933934	0.523923	1.13871	0.767008	1.34734	1.00425	2.85814
			La/Sm =	2.20844	2.55633	1.7552	1.76647	0.609885	0.360123	0.990337	1.89064	0.210072	0.315107
			La/Yb =	14.8055	27.9514	135.233	127.131	0.47868	1.37222	5.03146	0.0791663	0.0343054	0.0490077
				AVERAGE COMPOSITIONS:
				Dolomite	1s	Magnesite	1s	Siderite	1s	Dol-Pseudomorphs	1s	Apatite	1s
La	0.2469		La	66.0444	20.5448	0.36452	0.730646	1.69097	1.33693	0.972053	1.14558	1191.13	13.6324
Ce	0.6321		Ce	61.0577	21.9879	0.247192	0.585133	1.53852	1.60654	0.893846	0.950863	1090.26	3.45667
Pr	0.0959		Pr	50.128	19.4562	0.221585	0.387916	1.85089	2.19288	0.834202	0.884805	946.194	7.22591
Nd	0.4854		Nd	40.8173	15.9812	0.242068	0.405168	1.66873	1.9094	1.07128	1.04886	820.025	1.04886
Pm			Pm
Sm	0.1556		Sm	25.8705	8.08775	0.361504	0.242756	1.92802	2.70382	1.12468	0.954321	676.446	4.68072
Eu	0.0599		Eu	37.7144	9.07218	0.396494	0.281305	0.709516	1.20675	0.834725	0.472192	540.735	8.26335
Gd	0.2093		Gd	11.4581	2.90631	0.459866	0.293346	1.50502	1.54795	0.86001	0.608119	503.129	1.04732
Tb	0.0378		Tb	6.49351	1.78787	0.694444	0.445772	1.45503	1.5043	0.661376	0.561196	285.847	4.3025
Dy	0.2577		Dy	4.66363	0.898701	0.654831	0.488843	1.97905	1.99358	0.465658	0.164635	161.253	3.75916
Ho	0.0554		Ho	2.95372	0.566642	1.06047	0.59035	2.25632	1.77777	0.451264	0.127637	79.8736	0.893456
Er	0.1667		Er	1.51606	0.509079	0.967307	0.832724	2.86443	1.21405	0.119976	0	48.5603	0.805941
Tm	0.0261		Tm	1.25392	0.544302	1.38889	0.891224	3.63985	2.39272	0.191571	0.270922	30.4598	0.270922
Yb	0.1694		Yb	1.2504	0.534438	2.6343	2.50251	4.08796	2.39904	0.236128	0.166967	9.09091	0.500902
Lu	0.0256		Lu	1.10085	0.456152	2.68555	2.5353	4.98047	1.92361	0.195312	0.276214	6.83594	1.9335
			Eu/Eu* =	2.19052	0.135214	0.972444	0.624741	0.41652	0.306696	0.848745	0.185852	0.926889	0.00706612
			La/Sm =	2.55288	0.393803	1.00834	1.08195	0.877049	1.21981	0.864294	0.315107	1.76086	0.00563469
			La/Yb =	52.8185	54.5801	0.138375	0.229376	0.413646	0.0902817	4.11665	1.82962	131.024	4.05064
[truncated: 8 more columns]

## Sheet: Newania Literature
REE- Patterns:
Ray et al., 2013 CMP
	N-5 dc	N-6 dc	N-7A ac	N-8A dc	N-9 ap	N-11 ap	N-12 ac	N-13 dc	N-15 dc	N-20 dc	N-21 dc	N-27 dc	N-35 dc	N-36 ac
La	1056	117.2	142	91.1	1247	1550	20.6	38.3	18.1	310	48.6	184	66.9	1014
Ce	2234	195.1	303	173	2532	3486	51.2	94.2	41.2	736	116	445	146	2263
Pr	298	19	33.8	18.1	326	492	6	12	5.1	88.1	13.6	54.2	16.2	263
Nd	1099	67.6	129	66.5	1123	1321	23.8	51.7	22.3	357	54.8	225	61.4	1035
Pm
Sm	184.5	8.8	18.8	9.2	285	302	3.5	10.7	4.6	55.1	8.9	36.6	9.5	156
Eu	48.5	2.5	5.4	2.4	87	81.4	1	2.9	1.6	14.9	2.6	10.2	2.5	33.7
Gd	140	7.3	14.3	7.3	243	244	2.6	10.9	4	42	7	28.3	7.7	109
Tb	18.28	0.73	1.64	0.76	24.8	19.46	0.24	1.23	0.45	3.89	0.66	3.23	0.8	10.36
Dy	46.6	2.41	4.67	2.62	106	98.5	1.21	6.87	2.4	14	2.95	10.8	3.43	29.8
Ho	8.1	0.39	0.78	0.42	12.35	9.24	0.17	0.86	0.33	1.75	0.39	1.68	0.51	4.13
Er	14.84	0.83	1.54	0.89	21.06	16.09	0.37	1.73	0.7	3.41	0.81	3.32	1.11	8.17
Tm	1.04	0.08	0.12	0.08	1.59	1.19	0.04	0.17	0.07	0.25	0.08	0.27	0.11	0.52
Yb	5.12	0.43	0.64	0.48	7.52	5.69	0.25	0.95	0.42	1.29	0.46	1.16	0.67	2.73
Lu	0.47	0.05	0.06	0.05	0.7	0.52	0.03	0.1	0.05	0.13	0.05	0.15	0.08	0.26

## Sheet: Newania-norm. Literature
REE- Patterns:
Normalization
(after Pourmand et al. 2012)			Ray et al., 2013 CMP
				N-5 dc	N-6 dc	N-7A ac	N-8A dc	N-9 ap	N-11 ap	N-12 ac	N-13 dc	N-15 dc	N-20 dc	N-21 dc	N-27 dc	N-35 dc	N-36 ac
La	0.2469		La	4277.04	474.686	575.132	368.975	5050.63	6277.85	83.4346	155.124	73.309	1255.57	196.841	745.241	270.96	4106.93
Ce	0.6321		Ce	3534.25	308.654	479.355	273.691	4005.7	5514.95	80.9998	149.027	65.1796	1164.37	183.515	704.003	230.976	3580.13
Pr	0.0959		Pr	3107.4	198.123	352.45	188.738	3399.37	5130.34	62.5652	125.13	53.1804	918.665	141.814	565.172	168.926	2742.44
Nd	0.4854		Nd	2264.11	139.267	265.76	137	2313.56	2721.47	49.0317	106.51	45.9415	735.476	112.897	463.535	126.494	2132.26
Pm			Pm
Sm	0.1556		Sm	1185.73	56.5553	120.823	59.126	1831.62	1940.87	22.4936	68.7661	29.563	354.113	57.1979	235.219	61.054	1002.57
Eu	0.0599		Eu	809.683	41.7362	90.1503	40.0668	1452.42	1358.93	16.6945	48.414	26.7112	248.748	43.4057	170.284	41.7362	562.604
Gd	0.2093		Gd	668.896	34.8782	68.323	34.8782	1161.01	1165.79	12.4224	52.0784	19.1113	200.669	33.4448	135.213	36.7893	520.784
Tb	0.0378		Tb	483.598	19.3122	43.3862	20.1058	656.085	514.815	6.34921	32.5397	11.9048	102.91	17.4603	85.4497	21.164	274.074
Dy	0.2577		Dy	180.83	9.35196	18.1218	10.1669	411.331	382.227	4.69538	26.6589	9.31315	54.3267	11.4474	41.9092	13.3101	115.638
Ho	0.0554		Ho	146.209	7.03971	14.0794	7.58123	222.924	166.787	3.06859	15.5235	5.95668	31.5884	7.03971	30.3249	9.20578	74.5487
Er	0.1667		Er	89.0222	4.979	9.23815	5.33893	126.335	96.5207	2.21956	10.3779	4.19916	20.4559	4.85903	19.916	6.65867	49.0102
Tm	0.0261		Tm	39.8467	3.06513	4.5977	3.06513	60.9195	45.5939	1.53257	6.51341	2.68199	9.57854	3.06513	10.3448	4.21456	19.9234
Yb	0.1694		Yb	30.2243	2.53837	3.77804	2.83353	44.392	33.5891	1.4758	5.60803	2.47934	7.61511	2.71547	6.8477	3.95514	16.1157
Lu	0.0256		Lu	18.3594	1.95312	2.34375	1.95312	27.3437	20.3125	1.17188	3.90625	1.95312	5.07812	1.95312	5.85937	3.125	10.1562
			Eu/Eu* =	0.909164	0.939723	0.992223	0.882304	0.995993	0.903418	0.998716	0.809013	1.12376	0.933143	0.992412	0.954836	0.880634	0.778605
			La/Sm =	3.60708	8.39331	4.76013	6.2405	2.75747	3.23455	3.70926	2.25582	2.47976	3.54567	3.4414	3.16829	4.43804	4.0964
			La/Yb =	141.51	187.004	152.23	130.218	113.773	186.901	56.5353	27.661	29.568	164.879	72.4888	108.831	68.5084	254.84
