# Supplementary material
Source: Research Square preprint supplement (doi:10.21203/rs.3.rs-8133642/v1)
Supplement: Supplementary file 4 [file b420751848b43eb29ed27d77.xlsx]

## Sheet: General Information
Title: "New insights into formation of the dolomite – magnesite – siderite series in the Newania carbonatite complex, India: Mineralogy, petrology and in situ SIMS analyses (REE, d13C, d18O, U-Th-Pb ages)". Journal: Mineralogy and Petrology.
Authors: Jens Hopp*, Shrinivas G. Viladkar, Axel K. Schmitt, Andreas T. Hertwig, Alexander Varychev. Corresponding author*: Institute of Earth Sciences, Heidelberg University, Im Neuenheimer Feld 234-236, D-69120 Heidelberg, Germany. Email: jens.hopp@geow.uni-heidelberg.de
All SIMS data were obtained at the HIP national facility at Institute of Earth Sciences, Heidelberg University, Germany
Two mounts were analyzed for carbon and oxygen compositions. Two sessions of oxygen isotope analyses were performed: One session for dolomite, another session for magnesite-siderite.
In addition, in both sessions standards of dolomite-ankerite and of magnesite-siderite were investigated bracketing the sample spot analyses.
Similarly, carbon isotope standards of the dolomite - ankerite and magnesite - siderite series were measured bracketing the sample spot analyses.
Respective calibration is given in worksheets with notation "Calib".
Correction for mass bias depending on Fe content in carbonate in both oxygen and carbon isotopes was calculated according to the work of Sliwinski et al. 2016a, 2016b and 2018 (see specific worksheets for detailed information). Fe contents were derived from SEM analyses.
When possible, carbon spots wer set close to previously analyzed oxygen spots. As carbon analyses required a larger spot size and longer measurement time the total number of data is more restricted.
Analyzed standards were kindly provided by the WiscSIMS laboratory people at University of Wisconsin in Minneapolis. We very much appreciate this.

## Sheet: d18O Dol-Ank
File	Corresponding SEM spot ID	Date	Time	Ip (nA)	X	Y	16O	1SE%			d18O RAW **	1SE		** adjusted for FC baseline
WiscSIMS_Calib_Uw6220@1.asc		15.02.2023	10:11:00	1.6625	-1531	747	3.17477e+09	0.62457			13.712	0.0784928									Values for calibration
WiscSIMS_Calib_Uw6220@2.asc		15.02.2023	10:14:00	1.67348	-1689	410	3.16377e+09	0.588599			13.7369	0.0959001									d18O	1SE	N
WiscSIMS_Calib_Uw6220@3.asc		15.02.2023	10:17:00	1.66392	-1919	494	3.15364e+09	0.577277			13.6738	0.114612		Avg	1SD
WiscSIMS_Calib_Uw6220@4.asc		15.02.2023	10:20:00	1.66006	-1882	665	3.15375e+09	0.609804			13.8638	0.0991936	UW6220	13.7466	0.0823265						13.7466	0.041477	16	(includes drift)
WiscSIMS_Calib_UWAnk10@1.asc		15.02.2023	10:32:00	1.64883	-2743	-74	3.17039e+09	0.615765			11.9908	0.0859773
WiscSIMS_Calib_UWAnk10@2.asc		15.02.2023	10:35:00	1.64742	-3182	-935	3.19051e+09	0.606176			12.4476	0.110087
WiscSIMS_Calib_UWAnk10@3.asc		15.02.2023	10:38:00	1.64556	-3803	-358	3.17466e+09	0.577927			11.9723	0.0899678
WiscSIMS_Calib_UWAnk10@4.asc		15.02.2023	10:41:00	1.64325	-3656	1005	3.13226e+09	0.582681			12.081	0.102085	UWAnk10	12.1229	0.221578						12.093	0.110789	4
WiscSIMS_Calib_UWAnk4@1.asc		15.02.2023	10:47:00	1.63556	-1466	-2946	3.18106e+09	0.581564			6.0159	0.0698938
WiscSIMS_Calib_UWAnk4@2.asc		15.02.2023	10:50:00	1.63445	-2272	-3729	3.16736e+09	0.532903			6.15844	0.0618838
WiscSIMS_Calib_UWAnk4@3.asc		15.02.2023	10:53:00	1.63285	-3192	-4332	3.18552e+09	0.525694			6.01052	0.0601462
WiscSIMS_Calib_UWAnk4@4.asc		15.02.2023	10:57:00	1.63034	-1192	-3975	3.17914e+09	0.536051			5.65539	0.054542	UWAnk4	5.96006	0.214354						5.9303	0.107177	4
WiscSIMS_Calib_Uw6220@5.asc		15.02.2023	11:04:00	1.62185	-1540	578	3.09721e+09	0.524239			13.8322	0.129484					drift
WiscSIMS_Calib_Uw6220@6.asc		15.02.2023	11:07:00	1.6204	-1743	395	3.07638e+09	0.553557			13.7603	0.0886537					0.0295889
WiscSIMS_Calib_Uw6220@7.asc		15.02.2023	11:10:00	1.61817	-1820	408	3.07414e+09	0.536901			13.806	0.102957		Avg	1SD	Avg bracket	1SD
WiscSIMS_Calib_Uw6220@8.asc		15.02.2023	11:13:00	1.61501	-2062	663	3.05614e+09	0.571733			13.7081	0.0838578	UW6220	13.7766	0.0545054	13.7616	0.0665957
WiscSIMS_Calib_UWAnk7@1.asc		15.02.2023	11:19:00	1.60985	328	-2981	3.0995e+09	0.491915			7.95522	0.0490067
WiscSIMS_Calib_UWAnk7@2.asc		15.02.2023	11:22:00	1.60871	1061	-3785	3.11331e+09	0.47305			8.00462	0.0706623
WiscSIMS_Calib_UWAnk7@3.asc		15.02.2023	11:25:00	1.60476	610	-4418	3.1255e+09	0.544512			7.8177	0.070172
WiscSIMS_Calib_UWAnk7@4.asc		15.02.2023	11:28:00	1.60305	1403	-4941	3.12549e+09	0.544546		6.18091		0.0748776
WiscSIMS_Calib_UWAnk7@5.asc		15.02.2023	11:35:00	1.59785	1365	-4948	3.11988e+09	0.532115			8.16955	0.0793101	UWAnk7	7.98677	0.145265						7.82701	0.0726324	4
WiscSIMS_Calib_UWAnk1@1.asc		15.02.2023	11:40:00	1.59476	2675	-3869	3.09342e+09	0.47536			14.6644	0.0676461
WiscSIMS_Calib_UWAnk1@2.asc		15.02.2023	11:43:00	1.59421	1703	-2985	3.10384e+09	0.466514			14.7072	0.0557612
WiscSIMS_Calib_UWAnk1@3.asc		15.02.2023	11:46:00	1.5911	1134	-2252	3.08248e+09	0.441517			14.7076	0.0687946
WiscSIMS_Calib_UWAnk1@4.asc		15.02.2023	11:49:00	1.58867	2126	-1910	3.04527e+09	0.454585			14.5801	0.0884763	UWAnk1	14.6648	0.0599982						14.504	0.0299991	4
WiscSIMS_Calib_Uw6220@9.asc		15.02.2023	11:57:00	1.58259	-1260	746	2.99336e+09	0.471084			13.8656	0.0961991					drift
WiscSIMS_Calib_Uw6220@10.asc		15.02.2023	12:01:00	1.58133	-1161	728	2.99596e+09	0.478843			14.1154	0.093113					0.158519
WiscSIMS_Calib_Uw6220@11.asc		15.02.2023	12:04:00	1.57989	-1170	670	2.98039e+09	0.482109			13.9562	0.0689669		Avg	1SD	Avg bracket	1SD
WiscSIMS_Calib_Uw6220@12.asc		15.02.2023	12:07:00	1.57889	-1378	831	2.95732e+09	0.748214			13.6922	0.15334	UW6220	13.9073	0.176729	13.842	0.139785
WiscSIMS_Calib_UWAnk5cl@1.asc		15.02.2023	12:12:00	1.57534	1232	-465	3.23608e+09	0.542333			16.9277	0.0553457
WiscSIMS_Calib_UWAnk5cl@2.asc		15.02.2023	12:15:00	1.57468	1909	219	3.21722e+09	0.514656			16.9369	0.0502384
WiscSIMS_Calib_UWAnk5cl@3.asc		15.02.2023	12:19:00	1.57234	2445	-943	3.22562e+09	0.509251			16.7182	0.0587754
WiscSIMS_Calib_UWAnk5cl@4.asc		15.02.2023	12:22:00	1.57146	3593	-570	3.21095e+09	0.507734			16.995	0.0848101	UWAnk5cl	16.8944	0.12119						16.5679	0.0605948	4
WiscSIMS_Calib_UWAnk6a@1.asc		15.02.2023	12:28:00	1.56633	68	318	3.22297e+09	0.539246			15.2705	0.0576746
WiscSIMS_Calib_UWAnk6a@2.asc		15.02.2023	12:31:00	1.56515	-213	1420	3.16576e+09	0.531659		15.9455		0.0660424
WiscSIMS_Calib_UWAnk6a@3.asc		15.02.2023	12:34:00	1.56291	-14	2478	3.158e+09	0.517337			15.4335	0.079711
WiscSIMS_Calib_UWAnk6a@4.asc		15.02.2023	12:38:00	1.56077	1222	1996	3.1583e+09	0.519014			15.2581	0.0452187
WiscSIMS_Calib_UWAnk6a@5.asc		15.02.2023	12:41:00	1.55873	1169	2058	3.13018e+09	0.525402			15.2913	0.0499694	UWAnk6a	15.3133	0.0812902						14.9873	0.0406451	4
WiscSIMS_Calib_Uw6220@13.asc		15.02.2023	12:46:00	1.55422	-1146	1528	2.92839e+09	0.471184			14.1932	0.0440083					drift
WiscSIMS_Calib_Uw6220@14.asc		15.02.2023	12:50:00	1.554	-1055	1472	2.91773e+09	0.425752			14.0948	0.0696437					0.321228
WiscSIMS_Calib_Uw6220@15.asc		15.02.2023	12:53:00	1.55161	-1093	1414	2.90441e+09	0.481237			14.0056	0.0678756		Avg	1SD	Avg bracket	1SD
WiscSIMS_Calib_Uw6220@16.asc		15.02.2023	12:56:00	1.54953	-978	1427	2.90099e+09	0.463143			13.9955	0.0826333	UW6220	14.0723	0.0921427	13.9898	0.157473
Ne-5a-1_UW6220@1.asc		15.02.2023	13:20:00	1.56665	3549	-3680	2.90261e+09	0.600125		Mount change	13.9233	0.112587
Ne-5a-1_UW6220@2.asc		15.02.2023	13:23:00	1.56646	3586	-3722	2.91253e+09	0.640252			13.8979	0.0840877
Ne-5a-1_UW6220@3.asc		15.02.2023	13:26:00	1.56556	3574	-3782	2.91228e+09	0.664007			13.8279	0.100839		Avg	1SD
Ne-5a-1_UW6220@4.asc		15.02.2023	13:29:00	1.56419	3654	-3803	2.92248e+09	0.640855			13.977	0.0783425	UW6220	13.9065	0.0619354
Ne-5a-1_DAS_20@1.asc		15.02.2023	13:36:00	1.56081	4247	-1974	2.89339e+09	0.602047			1.54465	0.0898947
Ne-5a-1_DAS_20@2.asc		15.02.2023	13:39:00	1.55989	4467	-1921	2.87957e+09	0.615912			1.46175	0.0989623
Ne-5a-1_DAS_20@3.asc		15.02.2023	13:43:00	1.55685	-35	3854	2.91593e+09	0.647988			1.75778	0.0759523
Ne-5a-1_DAS_20@4.asc		15.02.2023	13:46:00	1.55612	224	3771	2.89641e+09	0.600024			1.67013	0.0877533
Ne-5a-1_DAS_20@5.asc		15.02.2023	13:51:00	1.55125	-3688	-2124	2.90724e+09	0.572371			1.6969	0.106965
Ne-5a-1_DAS_20@6.asc		15.02.2023	13:54:00	1.55176	-3871	-2098	2.89339e+09	0.56972			1.69348	0.0875506	DAS-20	1.63745	0.111089
Ne-5a-1_UW6220@5.asc		15.02.2023	13:58:00	1.54832	3618	-3654	2.86766e+09	0.564024			13.921	0.112671		Avg	1SD		22.6	True UW6220 VSMOW			d18O VSMOW	2SD		overall bias	bias (fit, rel UW6220)	Fe#
Ne-5a-1_UW6220@6.asc		15.02.2023	14:02:00	1.54861	3696	-3688	2.8571e+09	0.583047			13.9225	0.117491	UW6220	13.9217	0.00103312		-8.48646	Bias UW6220
Ne-5a-1_dol@1.asc	Ne-5a-1 Area 3 #46	15.02.2023	14:10:00	1.54215	2206	-1431	2.9019e+09	0.528272			6.08994	0.0889914									8.85511	0.194357		-2.74089	5.76775	0.21		bias max	9.39
Ne-5a-1_dol@2.asc	Ne-5a-1 Area 3 #19 (excl., mixed analysis)	15.02.2023	14:14:00	1.53984	2171	-1482	2.87186e+09	0.497584			7.30594	0.0775701								10.0744		0.194357		-2.74089	5.76775	0.21		k	0.13
Ne-5a-1_dol@3.asc	Ne-5a-1 Area 3 #22	15.02.2023	14:18:00	1.53839	2285	-1467	2.88633e+09	0.561477			5.93445	0.0828888									8.69919	0.194357		-2.74089	5.76775	0.21		n	0.97
Ne-5a-1_dol@4.asc	Ne-5a-1 Area 3 #33	15.02.2023	14:24:00	1.5358	1945	-1523	2.89555e+09	0.489021			5.84735	0.0724541									8.61185	0.194357		-2.74089	5.76775	0.21
Ne-5a-1_dol@5.asc	Ne-5a-1 Area 3 #36	15.02.2023	14:28:00	1.53353	1902	-1615	2.89167e+09	0.531669			6.17152	0.0411178									8.93691	0.194357		-2.74089	5.76775	0.21
Ne-5a-1_dol@6.asc	Ne-5a-1 Area 3 #45	15.02.2023	14:32:00	1.5328	2164	-1667	2.87472e+09	0.603538			5.944	0.072992									8.70876	0.194357		-2.74089	5.76775	0.21
Ne-5a-1_dol@7.asc	Ne-5a-1 Area 3 #40 / #29 (in between)	15.02.2023	14:36:00	1.53011	2353	-1564	2.8736e+09	0.522419			5.87954	0.0873679									8.64413	0.194357		-2.74089	5.76775	0.21
Ne-5a-1_dol@8.asc	Ne-5a-1 Area 3 #42	15.02.2023	14:40:00	1.52852	2474	-1548	2.87911e+09	0.50686			6.0869	0.0569812									8.85205	0.194357		-2.74089	5.76775	0.21
Ne-5a-1_dol@9.asc	Ne-5a-1 Area 2 #7 / #8 (in between)	15.02.2023	14:56:00	1.52125	2546	1403	2.78559e+09	0.550371			5.70323	0.0567909									8.46733	0.194357		-2.74089	5.76775	0.21
Ne-5a-1_dol@10.asc	Ne-5a-1 Area 2 #14	15.02.2023	15:00:00	1.51979	2488	1535	2.77222e+09	0.506749			5.68032	0.0589054									8.44436	0.194357		-2.74089	5.76775	0.21
Ne-5a-1_UW6220@7.asc		15.02.2023	15:11:00	1.51447	3782	-3814	2.78802e+09	0.607257			14.1987	0.0751324					22.6
Ne-5a-1_UW6220@8.asc		15.02.2023	15:14:00	1.5149	3717	-3859	2.78958e+09	0.584761			13.9062	0.0821168					-8.45985
Ne-5a-1_UW6220@9.asc		15.02.2023	15:17:00	1.51419	3488	-3679	2.75081e+09	0.551866			13.9425	0.114594		Avg	1SD	Avg bracket	1SD
Ne-5a-1_UW6220@10.asc		15.02.2023	15:21:00	1.51406	3512	-3625	2.71667e+09	0.468292			13.9726	0.0968325	UW6220	14.005	0.131951	13.949	0.0971785
Ne-5a-1_dol@11.asc	Ne-5a-1 Area 5 #99	15.02.2023	15:30:00	1.50779	-900	-2238	2.79942e+09	0.522145			6.2166	0.0586483									8.94955	0.263793		-2.7087	5.6619	0.2
Ne-5a-1_dol@12.asc	Ne-5a-1 Area 5 #100	15.02.2023	15:33:00	1.50721	-792	-2180	2.78001e+09	0.547055			6.04678	0.0616265									8.77926	0.263793		-2.7087	5.6619	0.2
Ne-5a-1_dol@13.asc	Ne-5a-1 Area 5 #112	15.02.2023	15:36:00	1.50525	-930	-2038	2.80956e+09	0.532005			6.28679	0.0798509									9.01993	0.263793		-2.7087	5.6619	0.2
Ne-5a-1_dol@14.asc	Ne-5a-1 Area 5 #110	15.02.2023	15:40:00	1.50405	-721	-2002	2.78936e+09	0.53813			6.1657	0.0967776									8.89851	0.263793		-2.7087	5.6619	0.2
Ne-5a-1_dol@15.asc	Ne-5a-1 Area 5 #126	15.02.2023	15:44:00	1.50253	-1160	-2143	2.82327e+09	0.497257			6.20199	0.0715402									8.93489	0.263793		-2.7087	5.6619	0.2
Ne-5a-1_dol@16.asc	Ne-5a-1 Area 5 #124	15.02.2023	15:50:00	1.49812	-1413	-2004	2.81997e+09	0.518339			6.32075	0.0745244									9.05398	0.263793		-2.7087	5.6619	0.2
Ne-5a-1_dol@17.asc	Ne-5a-1 Area 5 #134	15.02.2023	16:00:00	1.49393	-1338	-2428	2.79992e+09	0.517017			6.32978	0.0758093									9.06303	0.263793		-2.7087	5.6619	0.2
Ne-5a-1_dol@18.asc	Ne-5a-1 Area 4 #57	15.02.2023	16:05:00	1.49624	-301	-2487	2.80726e+09	0.483966			6.30517	0.0800251									9.03835	0.263793		-2.7087	5.6619	0.2
Ne-5a-1_dol@19.asc	Ne-5a-1 Area 4 #55	15.02.2023	16:12:00	1.49388	-324	-2735	2.77315e+09	0.500668			6.07892	0.076291									8.81149	0.263793		-2.7087	5.6619	0.2
Ne-5a-1_dol@20.asc	Ne-5a-1 Area 4 #56	15.02.2023	16:16:00	1.49145	2	-2526	2.74682e+09	0.488664			6.24136	0.0777639									8.97437	0.263793		-2.7087	5.6619	0.2
Ne-5a-1_dol@21.asc	Ne-5a-1 Area 4 #92	15.02.2023	16:19:00	1.49119	145	-2506	2.75365e+09	0.469758			6.1281	0.0830915									8.86081	0.263793		-2.7087	5.6619	0.2
Ne-5a-1_dol@22.asc	Ne-5a-1 Area 4 #68	15.02.2023	16:23:00	1.48948	144	-2364	2.75171e+09	0.552539			5.77675	0.0808027									8.5085	0.263793		-2.7087	5.6619	0.2
Ne-5a-1_UW6220@11.asc		15.02.2023	16:27:00	1.48759	3514	-3720	2.7158e+09	0.578167			14.2642	0.0744969					22.6
Ne-5a-1_UW6220@12.asc		15.02.2023	16:32:00	1.48505	3454	-3717	2.70498e+09	0.538461			14.1086	0.114381					-8.32347
Ne-5a-1_UW6220@13.asc		15.02.2023	16:35:00	1.48584	3622	-3757	2.6948e+09	0.542463			14.1787	0.0676723		Avg	1SD	Avg bracket	1SD
Ne-5a-1_UW6220@14.asc		15.02.2023	16:38:00	1.48426	3453	-3647	2.69767e+09	0.559611			14.1357	0.0937214	UW6220	14.1718	0.0680312	14.0884	0.131896
Ne-5b-1_UW6220@1.asc		15.02.2023	16:54:00	1.47912	4044	-2623	2.8028e+09	0.594235	Mount change	13.581		0.0925001
Ne-5b-1_UW6220@2.asc		15.02.2023	16:58:00	1.47733	4194	-2557	2.78559e+09	0.506585			14.4097	0.0949438
Ne-5b-1_UW6220@3.asc		15.02.2023	17:01:00	1.47519	4197	-2600	2.7905e+09	0.481506			14.437	0.0763103
Ne-5b-1_UW6220@4.asc		15.02.2023	17:05:00	1.47459	4240	-2541	2.74652e+09	0.428149			14.0467	0.0888743		Avg	1SD
Ne-5b-1_UW6220@5.asc		15.02.2023	17:08:00	1.47334	4117	-2906	2.75997e+09	0.474916			14.2178	0.0986848	UW6220	14.2778	0.182329
Ne-5b-1_UW6220@6.asc		15.02.2023	17:12:00	1.47104	-4804	-3221	2.76349e+09	0.449198			14.2756	0.0878885
Ne-5b-1_UW6220@7.asc		15.02.2023	17:15:00	1.4696	-4829	-3277	2.78422e+09	0.487027			14.3227	0.111701
Ne-5b-1_UW6220@8.asc		15.02.2023	17:19:00	1.46935	-4888	-3321	2.71187e+09	0.53631		13.569		0.144564
Ne-5b-1_UW6220@9.asc		15.02.2023	17:22:00	1.46763	-4842	-3352	2.78297e+09	0.536327			14.5335	0.0812219		Avg	1SD		22.6
Ne-5b-1_UW6220@10.asc		15.02.2023	17:26:00	1.4656	-4920	-3412	2.76937e+09	0.538782			14.4183	0.088623	UW6220	14.3875	0.114007		-8.03098
Ne-5b-1_DAS-20@1.asc		15.02.2023	17:30:00	1.46363	-1142	-5919	2.73791e+09	0.54566			2.09945	0.0753915
Ne-5b-1_DAS-20@2.asc		15.02.2023	17:33:00	1.46389	-1201	-5947	2.72777e+09	0.470799			2.12546	0.0745191
Ne-5b-1_DAS-20@3.asc		15.02.2023	17:37:00	1.46288	-5155	-1576	2.76322e+09	0.487843			1.83875	0.106109
Ne-5b-1_DAS-20@4.asc		15.02.2023	17:40:00	1.46303	-5095	-1626	2.7514e+09	0.450628			1.68448	0.0860494
Ne-5b-1_DAS-20@5.asc		15.02.2023	17:45:00	1.46181	3553	2606	2.74678e+09	0.473805			1.9384	0.076594
Ne-5b-1_DAS-20@6.asc		15.02.2023	17:48:00	1.4603	3602	2563	2.75684e+09	0.479313			1.89544	0.0771942
Ne-5b-1_DAS-20@7.asc		15.02.2023	17:54:00	1.45726	3982	-4560	2.73488e+09	0.494669			2.02816	0.0828581					22.6
Ne-5b-1_DAS-20@8.asc		15.02.2023	17:57:00	1.45683	4074	-4563	2.74213e+09	0.551307			2.0341	0.119305	DAS-20	1.95553	0.147382		-7.96676
Ne-5b-1_UW6220@11.asc		15.02.2023	18:02:00	1.45381	-4857	-3432	2.75753e+09	0.520201			14.5329	0.102371		Avg	1SD	Avg bracket	1SD				d18O VSMOW	2SD
Ne-5b-1_UW6220@12.asc		15.02.2023	18:05:00	1.45445	-4794	-3370	2.75196e+09	0.527805			14.6362	0.101645	UW6220	14.5845	0.0730788	14.4532	0.138632
Ne-5b-1_dol@1.asc	Ne-5b-1 Area 8 #123	15.02.2023	18:11:00	1.45263	1651	-2709	2.77841e+09	0.415218			6.07484	0.0633087									8.43442	0.257272		-2.33984	5.6619	0.2
Ne-5b-1_dol@2.asc	Ne-5b-1 Area 8 #121	15.02.2023	18:15:00	1.45216	1513	-2397	2.77229e+09	0.47776			6.1648	0.104187									8.52458	0.257272		-2.33984	5.6619	0.2
Ne-5b-1_dol@3.asc	Ne-5b-1 Area 8 #125	15.02.2023	18:19:00	1.45088	1018	-2640	2.77942e+09	0.425743			6.1814	0.079148									8.54122	0.257272		-2.33984	5.6619	0.2
Ne-5b-1_dol@4.asc	Ne-5b-1 Area 8 #117	15.02.2023	18:23:00	1.44936	1401	-2980	2.78366e+09	0.432646			6.20548	0.067824									8.56536	0.257272		-2.33984	5.6619	0.2
Ne-5b-1_dol@5.asc	Ne-5b-1 Area 8 #127	15.02.2023	18:28:00	1.44889	1250	-3445	2.76618e+09	0.396513			6.27936	0.0627863									8.63941	0.257272		-2.33984	5.6619	0.2
Ne-5b-1_dol@6.asc	Ne-5b-1 Area 5 #84 /#87 (in between)	15.02.2023	18:34:00	1.44609	1603	643	2.73343e+09	0.485147			6.23707	0.0696126									8.59703	0.257272		-2.33984	5.6619	0.2
Ne-5b-1_dol@7.asc	Ne-5b-1 Area 5 #86	15.02.2023	18:38:00	1.44363	1539	710	2.77661e+09	0.422462			6.47766	0.0759635									8.83818	0.257272		-2.33984	5.6619	0.2
Ne-5b-1_dol@8.asc	Ne-5b-1 Area 5 #80	15.02.2023	18:41:00	1.44205	1691	584	2.77177e+09	0.419729			6.55964	0.0902008									8.92035	0.257272		-2.33984	5.6619	0.2
Ne-5b-1_dol@9.asc	Ne-5b-1 Area 2 #15 / #16 (in between)	15.02.2023	18:47:00	1.44241	-953	-2978	2.76592e+09	0.466516			6.33296	0.0804047									8.69313	0.257272		-2.33984	5.6619	0.2
Ne-5b-1_dol@10.asc	Ne-5b-1 Area 2 #21	15.02.2023	18:51:00	1.4407	-1017	-3192	2.75956e+09	0.42524			6.26469	0.0970345									8.62471	0.257272		-2.33984	5.6619	0.2
Ne-5b-1_dol@11.asc	Ne-5b-1 Area 2 #18	15.02.2023	18:55:00	1.43903	-1078	-3033	2.76235e+09	0.402137			6.27724	0.080504									8.63729	0.257272		-2.33984	5.6619	0.2
Ne-5b-1_dol@12.asc	Ne-5b-1 Area 7 #113	15.02.2023	19:00:00	1.43708	-2787	-459	2.7688e+09	0.424414			6.32086	0.0482892									8.68101	0.257272		-2.33984	5.6619	0.2
Ne-5b-1_dol@13.asc	Ne-5b-1 Area 7 #112	15.02.2023	19:05:00	1.43434	-2475	-523	2.76979e+09	0.401876			6.26164	0.0558619									8.62165	0.257272		-2.33984	5.6619	0.2
Ne-5b-1_dol@14.asc	Ne-5b-1 Area 7 #115	15.02.2023	19:11:00	1.43346	-3148	-787	2.75871e+09	0.374412			6.30048	0.0558827									8.66059	0.257272		-2.33984	5.6619	0.2
Ne-5b-1_UW6220@13.asc		15.02.2023	19:16:00	1.43085	-4967	-3295	2.68228e+09	0.46579			14.5501	0.0828678					22.6
Ne-5b-1_UW6220@14.asc		15.02.2023	19:20:00	1.4303	-5028	-3284	2.69071e+09	0.485833			14.3051	0.0924847					-7.95668
Ne-5b-1_UW6220@15.asc		15.02.2023	19:23:00	1.42874	-4998	-3360	2.68851e+09	0.570213			14.4571	0.106471		Avg	1SD	Avg bracket	1SD
Ne-5b-1_UW6220@16.asc		15.02.2023	19:26:00	1.42848	-5083	-3371	2.67604e+09	0.500212			14.6034	0.0684466	UW6220	14.4789	0.13069	14.4635	0.128636
Ne-5b-1_dol@15.asc	Ne-5b-1 Area 4 #62	15.02.2023	19:35:00	1.42598	-2002	-2201	2.73332e+09	0.397237			6.21433	0.0636183									8.57169	0.20671		-2.33733	5.6619	0.2
Ne-5b-1_dol@16.asc	Ne-5b-1 Area 4 #64	15.02.2023	19:38:00	1.426	-2004	-2074	2.72705e+09	0.431864			6.23009	0.0618467									8.58749	0.20671		-2.33733	5.6619	0.2
Ne-5b-1_dol@17.asc	Ne-5b-1 Area 4 #67	15.02.2023	19:41:00	1.42341	-1777	-2236	2.748e+09	0.40355			6.45364	0.0469457									8.81156	0.20671		-2.33733	5.6619	0.2
Ne-5b-1_dol@18.asc	Ne-5b-1 Area 3 #42	15.02.2023	19:49:00	1.42065	-1449	-2131	2.73701e+09	0.398106			6.39613	0.0677838									8.75392	0.20671		-2.33733	5.6619	0.2
Ne-5b-1_dol@19.asc	Ne-5b-1 Area 3 #43 (excl., not a dol)	15.02.2023	19:52:00	1.42035	-1507	-2043	2.82166e+09	0.483995			3.03747	0.052757									Not a dolomite
Ne-5b-1_dol@20.asc	Ne-5b-1 Area 3 #33	15.02.2023	19:57:00	1.42014	-1319	-2136	2.69932e+09	0.386479			6.38874	0.0696748					22.6				8.74651	0.20671		-2.33733	5.6619	0.2
Ne-5b-1_dol@21.asc	Ne-5b-1 Area 3 #38	15.02.2023	20:06:00	1.41637	-1607	-2190	2.69144e+09	0.411616			6.79988	0.100543					-7.95419				8.45287	0.20671		-1.63914	6.36569	0.28
Ne-5b-1_UW6220@17.asc		15.02.2023	20:11:00	1.41566	-5124	-3432	2.62445e+09	0.378625			14.4309	0.112147		Avg	1SD	Avg bracket	1SD
Ne-5b-1_UW6220@18.asc		15.02.2023	20:14:00	1.41346	-5322	-3346	2.64776e+09	0.529176			14.4496	0.085685	UW6220	14.4403	0.0132459	14.466	0.103355

## Sheet: d18O Mgs-Sid
File	Corresponding SEM spot ID	Date	Time	Ip (nA)	X	Y	16O	1SE%			d18O RAW **	1SE		** adjusted for drift FC baseline
Mgs-Sid-Calib_UW6220@1.asc		16.02.2023	10:33:00	1.72861	-2206	-871	3.28823e+09	0.704466			1.49667	0.133005
Mgs-Sid-Calib_UW6220@2.asc		16.02.2023	10:36:00	1.72564	-2243	-823	3.2761e+09	0.731883			1.5376	0.107002
Mgs-Sid-Calib_UW6220@3.asc		16.02.2023	10:39:00	1.72164	-2128	-800	3.26392e+09	0.726035			1.43238	0.0849358
Mgs-Sid-Calib_UW6220@4.asc		16.02.2023	10:43:00	1.71901	-2072	-873	3.25427e+09	0.716198			1.49951	0.100029	DAS-20	1.49154	0.0436306
Mgs-Sid-Calib_Mgs1@1.asc		16.02.2023	10:51:00	1.70906	433	-1662	2.63055e+09	0.694354			-5.10737	0.0580781									Values for calibration
Mgs-Sid-Calib_Mgs1@2.asc		16.02.2023	10:54:00	1.70767	1062	-1991	2.62036e+09	0.702315			-4.9111	0.0607483									d18O	1SE	N
Mgs-Sid-Calib_Mgs1@3.asc		16.02.2023	10:57:00	1.70561	1965	-2908	2.61814e+09	0.710398			-5.07802	0.0670966		Avg	1SD
Mgs-Sid-Calib_Mgs1@4.asc		16.02.2023	11:00:00	1.70358	2591	-3231	2.6065e+09	0.693247			-4.73188	0.0873748	UWMgs1	-4.95709	0.173244						-4.93227	0.0510353	12
Mgs-Sid-Calib_Mgs4@1.asc		16.02.2023	11:06:00	1.69321	755	226	2.84779e+09	0.721388			4.89077	0.0607951
Mgs-Sid-Calib_Mgs4@2.asc		16.02.2023	11:09:00	1.69207	1412	339	2.81659e+09	0.719383			4.75009	0.0611378
Mgs-Sid-Calib_Mgs4@3.asc		16.02.2023	11:12:00	1.68893	2042	449	2.80952e+09	0.712535			4.96142	0.0566831
Mgs-Sid-Calib_Mgs4@4.asc		16.02.2023	11:15:00	1.68567	2890	410	2.7793e+09	0.72174			4.83768	0.0585189	UWMgs4	4.85999	0.089088						4.85999	0.044544	4
Mgs-Sid-Calib_Mgs7@1.asc		16.02.2023	11:23:00	1.67555	556	1896	3.21563e+09	0.665131			9.53672	0.0674703
Mgs-Sid-Calib_Mgs7@2.asc		16.02.2023	11:26:00	1.6738	466	2925	3.22623e+09	0.770838			10.2195	0.111387
Mgs-Sid-Calib_Mgs7@3.asc		16.02.2023	11:29:00	1.67164	-620	2802	3.21026e+09	0.622328			9.65545	0.0328877
Mgs-Sid-Calib_Mgs7@4.asc		16.02.2023	11:32:00	1.6696	-660	1829	3.20973e+09	0.621371			11.0497	0.0646445
Mgs-Sid-Calib_Mgs7@5.asc		16.02.2023	11:35:00	1.66753	-2082	1926	3.26319e+09	0.654311			10.5662	0.0435535
Mgs-Sid-Calib_Mgs7@6.asc		16.02.2023	11:38:00	1.66631	-1884	2840	3.22202e+09	0.62741			10.6396	0.059192
Mgs-Sid-Calib_Mgs7@7.asc		16.02.2023	11:41:00	1.66413	-2801	3391	3.21709e+09	0.670502			9.31063	0.0866541
Mgs-Sid-Calib_Mgs7@8.asc		16.02.2023	11:45:00	1.66225	-2989	2198	3.34081e+09	0.682941		7.16935		0.03771
Mgs-Sid-Calib_Mgs7@9.asc		16.02.2023	11:48:00	1.65921	-4066	2286	3.28253e+09	0.640716			8.6633	0.0547946
Mgs-Sid-Calib_Mgs7@10.asc		16.02.2023	11:51:00	1.65705	-3904	3380	3.2442e+09	0.592151			8.42321	0.0721254	UWMgs7	9.78493	0.90451						9.78493	0.301503	9
Mgs-Sid-Calib_Mgs1@5.asc		16.02.2023	11:57:00	1.65131	456	-1717	2.50159e+09	0.730098			-4.92164	0.0511852
Mgs-Sid-Calib_Mgs1@6.asc		16.02.2023	12:00:00	1.65031	1189	-2021	2.49733e+09	0.715001			-5.05202	0.0669743
Mgs-Sid-Calib_Mgs1@7.asc		16.02.2023	12:03:00	1.64804	2055	-2734	2.50038e+09	0.704516		-5.40455		0.0958361
Mgs-Sid-Calib_Mgs1@8.asc		16.02.2023	12:06:00	1.64511	2675	-3131	2.50407e+09	0.724068			-4.79172	0.0658521		Avg	1SD	Avg bracket	1SD
Mgs-Sid-Calib_Mgs1@9.asc		16.02.2023	12:12:00	1.64049	2626	-3158	2.49259e+09	0.711301			-4.62879	0.0891717	UWMgs1	-4.84854	0.180986	-4.90282	0.173976
Mgs-Sid-Calib_Sd3@1.asc		16.02.2023	12:19:00	1.63696	-3489	-1341	3.46217e+09	0.603189			6.41684	0.0439403
Mgs-Sid-Calib_Sd3@2.asc		16.02.2023	12:22:00	1.63912	-3953	-1612	3.48432e+09	0.606004			6.34037	0.0457566
Mgs-Sid-Calib_Sd3@3.asc		16.02.2023	12:25:00	1.63843	-4587	-1672	3.49268e+09	0.601367			6.41526	0.0587553
Mgs-Sid-Calib_Sd3@4.asc		16.02.2023	12:28:00	1.63603	-5336	-1924	3.52377e+09	0.603027			6.3472	0.0360677	UWSd3	6.37992	0.0418224						6.37992	0.0209112	4
Mgs-Sid-Calib_Sd2@1.asc		16.02.2023	12:34:00	1.63253	-2183	-2704	3.3412e+09	0.616469			7.57049	0.0658893
Mgs-Sid-Calib_Sd2@2.asc		16.02.2023	12:37:00	1.63315	-2730	-3511	3.40402e+09	0.621069			7.57891	0.0499104
Mgs-Sid-Calib_Sd2@3.asc		16.02.2023	12:40:00	1.63263	-3059	-4230	3.39378e+09	0.630743			7.59568	0.0384625
Mgs-Sid-Calib_Sd2@4.asc		16.02.2023	12:43:00	1.62987	-3344	-4953	3.39485e+09	0.624228			7.92853	0.0604341	UWSd2	7.6684	0.173737						7.6684	0.0868684	4
Mgs-Sid-Calib_Sd1@1.asc		16.02.2023	12:49:00	1.62463	-1123	-2764	3.21277e+09	0.578034			3.91424	0.103948
Mgs-Sid-Calib_Sd1@2.asc		16.02.2023	12:52:00	1.62221	-1072	-3395	3.21888e+09	0.606564			3.9934	0.0923977
Mgs-Sid-Calib_Sd1@3.asc		16.02.2023	12:55:00	1.61894	-390	-4273	3.20888e+09	0.600458			4.02653	0.0932042
Mgs-Sid-Calib_Sd1@4.asc		16.02.2023	12:58:00	1.61746	413	-5478	3.23301e+09	0.598276			3.89434	0.105862	UWSd1	3.95713	0.0630198						3.95713	0.0315099	4
Mgs-Sid-Calib_Mgs1@10.asc		16.02.2023	13:04:00	1.61284	355	-1826	2.4185e+09	0.791812			-5.13881	0.0468525
Mgs-Sid-Calib_Mgs1@11.asc		16.02.2023	13:07:00	1.61282	1016	-2285	2.41542e+09	0.760721			-5.17329	0.0771782
Mgs-Sid-Calib_Mgs1@12.asc		16.02.2023	13:10:00	1.61327	2156	-2796	2.40251e+09	0.799309		-5.4819		0.074259
Mgs-Sid-Calib_Mgs1@13.asc		16.02.2023	13:13:00	1.61149	2659	-3378	2.40315e+09	0.795522			-4.85614	0.102345		Avg	1SD	Avg bracket	1SD
Mgs-Sid-Calib_Mgs1@14.asc		16.02.2023	13:17:00	1.60886	2669	-3432	2.3969e+09	0.806774			-4.79645	0.0695573	UWMgs1	-4.99117	0.192452	-4.91986	0.189009
Ne5b-1_Mgs1@1.asc		16.02.2023	13:40:00	1.60031	-5309	264	2.39565e+09	0.742221	Mount change	-4.09875		0.0712975
Ne5b-1_Mgs1@2.asc		16.02.2023	13:43:00	1.59924	-5252	238	2.39121e+09	0.782776		-4.62085		0.065904
Ne5b-1_Mgs1@3.asc		16.02.2023	13:47:00	1.59639	3834	1222	2.38257e+09	0.794682			-5.07265	0.0865
Ne5b-1_Mgs1@4.asc		16.02.2023	13:50:00	1.59665	3912	1255	2.38061e+09	0.76138			-5.12806	0.04748
Ne5b-1_Mgs1@5.asc		16.02.2023	13:54:00	1.59451	3856	1302	2.36677e+09	0.768315			-5.14196	0.0523214
Ne5b-1_Mgs1@6.asc		16.02.2023	13:58:00	1.58916	-5017	162	2.36843e+09	0.769079			-4.95326	0.0430311		Avg	1SD
Ne5b-1_Mgs1@7.asc		16.02.2023	14:01:00	1.58892	-4968	106	2.35334e+09	0.716735			-4.99199	0.0806139	UWMgs1	-5.05759	0.082913
Ne-5b-1_DAS_20@9.asc		16.02.2023	14:06:00	1.58475	-5035	-1679	3.00371e+09	0.677133			1.83911	0.0907599
Ne-5b-1_DAS_20@10.asc		16.02.2023	14:09:00	1.58428	-5174	-1568	2.99605e+09	0.720829			1.78256	0.0833929
Ne-5b-1_DAS_20@11.asc		16.02.2023	14:13:00	1.58237	-1212	-5788	2.97093e+09	0.647661			1.95994	0.0895201
Ne-5b-1_DAS_20@12.asc		16.02.2023	14:16:00	1.58169	-912	-5887	2.96885e+09	0.683927			2.05447	0.100311
Ne-5b-1_DAS_20@13.asc		16.02.2023	14:20:00	1.57711	3930	-4504	2.94582e+09	0.744355			1.95777	0.085041
Ne-5b-1_DAS_20@14.asc		16.02.2023	14:23:00	1.57508	3875	-4520	2.93633e+09	0.655449			1.84384	0.073517
Ne-5b-1_DAS_20@15.asc		16.02.2023	14:27:00	1.57393	4083	-629	2.95806e+09	0.661795			1.72678	0.118155
Ne-5b-1_DAS_20@16.asc		16.02.2023	14:30:00	1.57236	4154	-576	2.96408e+09	0.680381			1.88848	0.0828567	DAS-20	1.88162	0.106153
Ne5b-1_Mgs1@8.asc		16.02.2023	14:34:00	1.56911	3890	1190	2.3117e+09	0.772138			-5.01826	0.0469385					12.28	True UWMgs1 VSMOW
Ne5b-1_Mgs1@9.asc		16.02.2023	14:37:00	1.56823	3916	1330	2.31334e+09	0.745179			-5.09421	0.078189					-17.1172	Bias UWMgs1			d18O VSMOW	2SD		overall bias	bias (fit, rel UW6220)	Fe#
Ne5b-1_Mgs1@10.asc		16.02.2023	14:40:00	1.56913	3968	1297	2.29872e+09	0.712389			-5.01762	0.0683668		Avg	1SD	Avg bracket	1SD
Ne5b-1_Mgs1@11.asc		16.02.2023	14:43:00	1.57114	3965	1227	2.32197e+09	0.713527			-5.00849	0.0592556	UWMgs1	-5.03465	0.039958	-5.04739	0.0646699
Ne5b-1_Mgs-Sd@1.asc	Ne-5b-1 Area 4 #51 (excl.)	16.02.2023	14:48:00	1.56794	-1896	-2080	3.39136e+09	0.656147			2.02437	0.0496431								10.6725		0.0741473		-8.55679	8.6999	0.59		m	-6.00889
Ne5b-1_Mgs-Sd@2.asc	Ne-5b-1 Area 4 #71 (excl.)	16.02.2023	14:55:00	1.56511	-1881	-2151	3.18571e+09	0.6284			1.64256	0.0381817								8.84503		0.0741473		-7.13933	10.142	0.35		n	12.2452
Ne5b-1_Mgs-Sd@3.asc	Ne-5b-1 Area 4 #49 / #50 (excl.)	16.02.2023	14:59:00	1.56618	-1860	-2100	3.38362e+09	0.57281			2.2048	0.0380005								11.1556		0.0741473		-8.85209	8.39946	0.64
Ne5b-1_Mgs-Sd@4.asc	Ne-5b-1 Area 4 #52	16.02.2023	15:02:00	1.56558	-1792	-2143	3.10155e+09	0.647578			3.35387	0.057102									10.3883	0.0741473		-6.96214	10.3223	0.32
Ne5b-1_Mgs-Sd@5.asc	Ne-5b-1 Area 4 #47	16.02.2023	15:05:00	1.56032	-1807	-2230	3.331e+09	0.645164			1.5085	0.0279387									10.2123	0.0741473		-8.61585	8.63982	0.6
Ne5b-1_Mgs-Sd@6.asc	Ne-5b-1 Area 4 #69	16.02.2023	15:09:00	1.55664	-1864	-2224	3.09474e+09	0.641857			1.71696	0.066759									8.91997	0.0741473		-7.13933	10.142	0.35
Ne5b-1_Mgs-Sd@7.asc	Ne-5b-1 Area 4 near #45 (in Mgs)	16.02.2023	15:12:00	1.55471	-1760	-2265	3.05349e+09	0.620284			2.87929	0.0448688									10.09	0.0741473		-7.14	10.14	0.35
Ne5b-1_Mgs-Sd@8.asc	Ne-5b-1 Area 3 #29	16.02.2023	15:17:00	1.55176	-1505	-2003	3.31123e+09	0.637304			2.08815	0.0626127									10.797	0.0741473		-8.61585	8.63982	0.6
Ne5b-1_Mgs-Sd@9.asc	Ne-5b-1 Area 3 #32	16.02.2023	15:20:00	1.55082	-1434	-1958	3.04506e+09	0.650979			3.17703	0.0568013									10.1502	0.0741473		-6.90308	10.3824	0.31
Ne5b-1_Mgs-Sd@10.asc	Ne-5b-1 Area 3 #44	16.02.2023	15:24:00	1.54939	-1554	-2037	3.04173e+09	0.645383			2.71052	0.066786									9.74048	0.0741473		-6.96214	10.3223	0.32
Ne5b-1_Mgs1@12.asc		16.02.2023	15:29:00	1.5472	3816	1271	2.25111e+09	0.714928			-5.0203	0.0624174					12.28
Ne5b-1_Mgs1@13.asc		16.02.2023	15:33:00	1.54639	3942	1171	2.25392e+09	0.77604			-5.09765	0.0595697					-17.1079
Ne5b-1_Mgs1@14.asc		16.02.2023	15:36:00	1.5462	4006	1250	2.25e+09	0.720398			-5.03919	0.0593521		Avg	1SD	Avg bracket	1SD
Ne5b-1_Mgs1@15.asc		16.02.2023	15:39:00	1.54538	3968	1358	2.24328e+09	0.696969			-5.00778	0.0657997	UWMgs1	-5.04123	0.0397681	-5.03794	0.0370737
Ne5b-1_Mgs-Sd@11.asc	Ne-5b-1 Area 3 #35	16.02.2023	15:46:00	1.53989	-1491	-2183	3.0336e+09	0.608086			2.9607	0.0523464									10.0271	0.118036		-6.99624	10.2622	0.33
Ne5b-1_Mgs-Sd@12.asc	Ne-5b-1 Area 3 #24 (excl.)	16.02.2023	15:49:00	1.53892	-1427	-2172	3.30024e+09	0.522608			2.46555	0.0441344								11.3933		0.118036		-8.82718	8.39946	0.64
Ne5b-1_Mgs-Sd@13.asc	Ne-5b-1 Area 3 #25	16.02.2023	15:53:00	1.53817	-1458	-2153	3.3344e+09	0.5688			1.8412	0.0602027									10.5225	0.118036		-8.59093	8.63982	0.6
Ne5b-1_Mgs-Sd@14.asc	Ne-5b-1 Area 8 #130	16.02.2023	15:59:00	1.53554	870	-2924	2.98144e+09	0.582355			3.05911	0.0470851									10.006	0.118036		-6.87812	10.3824	0.31
Ne5b-1_Mgs-Sd@15.asc	Ne-5b-1 Area 8 #128	16.02.2023	16:03:00	1.53392	815	-3076	2.97493e+09	0.609803			2.91988	0.0573206									9.86586	0.118036		-6.87812	10.3824	0.31
Ne5b-1_Mgs-Sd@16.asc	Ne-5b-1 Area 8 #129	16.02.2023	16:06:00	1.53283	774	-3168	2.96984e+09	0.624808			2.9208	0.0772239									9.92684	0.118036		-6.93718	10.3223	0.32
Ne5b-1_Mgs-Sd@17.asc	Ne-5b-1 Area 8 #133	16.02.2023	16:10:00	1.53195	600	-2978	2.97767e+09	0.590266			2.92893	0.0436001									9.93503	0.118036		-6.93718	10.3223	0.32
Ne5b-1_Mgs-Sd@18.asc	Ne-5b-1 Area 8 #131	16.02.2023	16:14:00	1.53045	645	-2868	2.98627e+09	0.639552			2.92292	0.0571951									9.92897	0.118036		-6.93718	10.3223	0.32
Ne5b-1_Mgs-Sd@19.asc	Ne-5b-1 Area 8 #132	16.02.2023	16:17:00	1.53069	664	-2780	2.95057e+09	0.585634			3.02214	0.0494075									9.96882	0.118036		-6.87812	10.3824	0.31
Ne5b-1_Mgs-Sd@20.asc	Ne-5b-1 Area 5 #78	16.02.2023	16:22:00	1.52927	1616	596	2.96667e+09	0.59026			3.12702	0.0590915									10.1345	0.118036		-6.93718	10.3223	0.32
Ne5b-1_Mgs-Sd@21.asc	Ne-5b-1 Area 5 #75	16.02.2023	16:26:00	1.52527	1597	645	3.24033e+09	0.65421			2.13546	0.0604769									10.6989	0.118036		-8.4728	8.75999	0.58
Ne5b-1_Mgs-Sd@22.asc	Ne-5b-1 Area 5 #88	16.02.2023	16:29:00	1.52598	1678	742	2.96169e+09	0.613331			3.07703	0.0586393									10.0842	0.118036		-6.93718	10.3223	0.32
Ne5b-1_Mgs1@16.asc		16.02.2023	16:33:00	1.52386	4007	1320	2.19022e+09	0.650947			-5.01851	0.0651013					12.28
Ne5b-1_Mgs1@17.asc		16.02.2023	16:36:00	1.52375	4044	1280	2.1981e+09	0.654411			-5.0326	0.0896184					-17.0831
Ne5b-1_Mgs1@18.asc		16.02.2023	16:39:00	1.52178	4017	1204	2.19175e+09	0.635647			-5.00037	0.0651923		Avg	1SD	Avg bracket	1SD
Ne5b-1_Mgs1@19.asc		16.02.2023	16:44:00	1.51862	4063	1230	2.18578e+09	0.677974			-4.887	0.0973721	UWMgs1	-4.98462	0.0664025	-5.01293	0.0590181
Ne5b-1_Mgs-Sd@23.asc	Ne-5b-1 Area 2 #13	16.02.2023	16:50:00	1.51731	-725	-2942	3.02734e+09	0.585842			2.77765	0.0444964									10.0365	0.136397		-7.18676	10.0819	0.36
Ne5b-1_Mgs-Sd@24.asc	Ne-5b-1 Area 2 #17	16.02.2023	16:53:00	1.51787	-972	-2853	2.95482e+09	0.609331			3.36455	0.0671741									10.3873	0.136397		-6.95052	10.3223	0.32
Ne5b-1_Mgs-Sd@25.asc	Ne-5b-1 Area 2 #4 / #5 / #6	16.02.2023	16:58:00	1.51656	-827	-3031	3.22227e+09	0.513655			2.69361	0.0647067									11.3959	0.136397		-8.60424	8.63982	0.6
Ne5b-1_Mgs-Sd@26.asc	Ne-5b-1 Area 6 #98	16.02.2023	17:09:00	1.51092	-2108	-4297	3.1986e+09	0.597595			2.7493	0.0563716									11.1509	0.136397		-8.30893	8.94026	0.55
Ne5b-1_Mgs-Sd@27.asc	Ne-5b-1 Area 6 #96	16.02.2023	17:13:00	1.50861	-2116	-4370	3.2372e+09	0.565432			2.8231	0.059535									11.3458	0.136397		-8.42706	8.82008	0.57		Ne-5b-1	Mean	1sd	2sd	N
Ne5b-1_Mgs-Sd@28.asc	Ne-5b-1 Area 6 #103	16.02.2023	17:17:00	1.50674	-2171	-4408	2.93096e+09	0.593321			3.26028	0.0570571									10.2823	0.136397		-6.95052	10.3223	0.32		Mgs	9.99441	0.316781	0.633562	18
Ne5b-1_Mgs-Sd@29.asc	Ne-5b-1 Area 6 #94	16.02.2023	17:21:00	1.50538	-2133	-4451	3.19861e+09	0.654778			3.03601	0.0553507									11.44	0.136397		-8.30893	8.94026	0.55		Sid	10.7861	0.461674	0.923347	5
Ne5b-1_Mgs1@20.asc		16.02.2023	17:27:00	1.50285	4017	1369	2.14226e+09	0.631305			-5.10574	0.0633768					12.28
Ne5b-1_Mgs1@21.asc		16.02.2023	17:30:00	1.50148	4047	1354	2.15088e+09	0.641278			-5.00872	0.0813693					-17.0963
Ne5b-1_Mgs1@22.asc		16.02.2023	17:34:00	1.50146	4089	1354	2.15042e+09	0.584895			-5.06703	0.0722523		Avg	1SD	Avg bracket	1SD
Ne5b-1_Mgs1@23.asc		16.02.2023	17:37:00	1.50122	4128	1342	2.14331e+09	0.592187			-5.09035	0.103671	UWMgs1	-5.06796	0.0425802	-5.02629	0.0681985
Ne5a-1_Mgs1@1.asc		16.02.2023	17:52:00	1.4945	4276	980	2.14595e+09	0.636097		Mount change	-5.46432	0.0908204
Ne5a-1_Mgs1@2.asc		16.02.2023	17:55:00	1.49592	4338	873	2.12242e+09	0.650228			-5.29879	0.0753758
Ne5a-1_Mgs1@3.asc		16.02.2023	17:58:00	1.49566	4374	807	2.14928e+09	0.644229			-5.45727	0.108027		Avg	1SD
Ne5a-1_Mgs1@4.asc		16.02.2023	18:02:00	1.49513	4493	214	2.14948e+09	0.648735			-5.3403	0.0834715	UWMgs1	-5.39017	0.0833426
Ne-5a-1_DAS_20@7.asc		16.02.2023	18:06:00	1.4953	3890	2236	2.7602e+09	0.587947			2.11282	0.0840089
Ne-5a-1_DAS_20@8.asc		16.02.2023	18:10:00	1.49485	3867	2305	2.75356e+09	0.537466			2.06097	0.0693105
Ne-5a-1_DAS_20@9.asc		16.02.2023	18:13:00	1.49294	4522	-1874	2.74491e+09	0.575095			1.95815	0.0632569
Ne-5a-1_DAS_20@10.asc		16.02.2023	18:17:00	1.49153	4557	-1815	2.7427e+09	0.583842			2.03297	0.0677264
Ne-5a-1_DAS_20@11.asc		16.02.2023	18:21:00	1.487	-3670	-2172	2.72406e+09	0.587504			2.02199	0.073851
Ne-5a-1_DAS_20@12.asc		16.02.2023	18:24:00	1.48558	-3624	-2222	2.71511e+09	0.460933		1.63326		0.0957832
Ne-5a-1_DAS_20@13.asc		16.02.2023	18:27:00	1.48479	-3576	-2171	2.72555e+09	0.511964			1.97925	0.0759795	DAS-20	2.03738	0.0565286
Ne5a-1_Mgs1@5.asc		16.02.2023	18:31:00	1.48383	-3307	142	2.12702e+09	0.631758			-5.15947	0.0816406
Ne5a-1_Mgs1@6.asc		16.02.2023	18:35:00	1.48278	-3132	96	2.12822e+09	0.604146			-5.22772	0.0682252					12.28
Ne5a-1_Mgs1@7.asc		16.02.2023	18:40:00	1.47931	-3072	31	2.13857e+09	0.591601			-5.41349	0.0853642					-17.394
Ne5a-1_Mgs1@8.asc		16.02.2023	18:44:00	1.47833	4384	548	2.11108e+09	0.578508			-5.37319	0.0809772		Avg	1SD	Avg bracket	1SD				d18O VSMOW	2SD
Ne5a-1_Mgs1@9.asc		16.02.2023	18:47:00	1.47647	4354	692	2.08855e+09	0.621129			-5.21339	0.0720476	UWMgs1	-5.27745	0.109735	-5.32755	0.110249
Ne-5a-1_Mgs-Sd@1.asc	Ne-5a-1 Area 2 #13	16.02.2023	18:51:00	1.47566	2681	1251	2.84199e+09	0.525855			3.09359	0.0490145									10.3973	0.249924		-7.22856	10.2622	0.33
Ne-5a-1_Mgs-Sd@2.asc	Ne-5a-1 Area 2 #6	16.02.2023	18:54:00	1.47354	2665	1382	2.83521e+09	0.588843			3.07827	0.0572526									10.3819	0.249924		-7.22856	10.2622	0.33
Ne-5a-1_Mgs-Sd@3.asc	Ne-5a-1 Area 2 #9	16.02.2023	18:58:00	1.47116	2551	1224	2.85266e+09	0.511043			3.18457	0.0640392									10.4288	0.249924		-7.16951	10.3223	0.32
Ne-5a-1_Mgs-Sd@4.asc	Ne-5a-1 Area 2 #16	16.02.2023	19:01:00	1.4711	2378	1430	2.82854e+09	0.574285			3.12897	0.0467479									10.3728	0.249924		-7.16951	10.3223	0.32
Ne-5a-1_Mgs-Sd@5.asc	Ne-5a-1 Area 2 #3	16.02.2023	19:05:00	1.4662	2598	1352	2.92587e+09	0.575075			3.21169	0.0492942									10.877	0.249924		-7.58285	9.90168	0.39
Ne-5a-1_Mgs-Sd@6.asc	Ne-5a-1 Area 3 #18	16.02.2023	19:09:00	1.46575	2204	-1524	2.97229e+09	0.574291			5.56489	0.0572115									13.6704	0.249924		-7.99619	9.48106	0.46
Ne-5a-1_Mgs-Sd@7.asc	Ne-5a-1 Area 3 #25	16.02.2023	19:13:00	1.46288	2070	-1436	2.81473e+09	0.5489			3.41665	0.0616576									10.6626	0.249924		-7.16951	10.3223	0.32
Ne-5a-1_Mgs-Sd@8.asc	Ne-5a-1 Area 3 #30	16.02.2023	19:16:00	1.4629	2157	-1333	2.79084e+09	0.531132			3.47235	0.0457802									10.7187	0.249924		-7.16951	10.3223	0.32
Ne-5a-1_Mgs-Sd@9.asc	Ne-5a-1 Area 3 #31	16.02.2023	19:19:00	1.17088	1965	-1376	2.84943e+09	0.539977			3.32321	0.0702554									10.5685	0.249924		-7.16951	10.3223	0.32
Ne-5a-1_Mgs-Sd@10.asc	Ne-5a-1 Area 3 #32	16.02.2023	19:23:00	1.47243	1986	-1641	2.82002e+09	0.546256			3.43058	0.066478									10.6165	0.249924		-7.11046	10.3824	0.31
Ne-5a-1_Mgs-Sd@11.asc	Ne-5a-1 Area 5 #108	16.02.2023	19:27:00	1.4674	-916	-2134	2.82236e+09	0.558322			3.47103	0.0581094									10.6573	0.249924		-7.11046	10.3824	0.31
Ne-5a-1_Mgs-Sd@12.asc	Ne-5a-1 Area 5 #95	16.02.2023	19:32:00	1.46286	-941	-2338	2.8169e+09	0.520464			3.49794	0.0521816									10.6243	0.249924		-7.05141	10.4425	0.3
Ne-5a-1_Mgs-Sd@13.asc	Ne-5a-1 Area 5 #96	16.02.2023	19:35:00	1.46337	-713	-2234	2.81071e+09	0.550392			3.502	0.057704									10.6885	0.249924		-7.11046	10.3824	0.31
Ne-5a-1_Mgs-Sd@14.asc	Ne-5a-1 Area 5 #101	16.02.2023	19:40:00	1.46177	-992	-2429	2.80939e+09	0.51673			3.45084	0.0755181									10.697	0.249924		-7.16951	10.3223	0.32
Ne-5a-1_Mgs-Sd@15.asc	Ne-5a-1 Area 5 #104	16.02.2023	19:44:00	1.46019	-1179	-2365	2.79988e+09	0.515387			3.57764	0.0702374									10.7646	0.249924		-7.11046	10.3824	0.31
Ne5a-1_Mgs1@10.asc		16.02.2023	19:49:00	1.45715	-3323	327	2.08896e+09	0.576229			-5.16329	0.066047					12.28
Ne5a-1_Mgs1@11.asc		16.02.2023	19:53:00	1.45783	-3374	259	2.07793e+09	0.608361			-5.31472	0.0767435					-17.3131
Ne5a-1_Mgs1@12.asc		16.02.2023	19:56:00	1.45726	-3272	45	2.07292e+09	0.570563			-5.01556	0.0701901		Avg	1SD	Avg bracket	1SD
Ne5a-1_Mgs1@13.asc		16.02.2023	19:59:00	1.45655	-3028	-66	2.09005e+09	0.557071			-5.33054	0.0706191	UWMgs1	-5.20603	0.147672	-5.24571	0.124962

## Sheet: d13C
File	Corresponding SEM spot ID close to O spot	Corresponding O spot SIMS ID	Date	Time	Ip (nA)	X	Y	12C	1SE%	13C	1SE%	13C 1H	1SE%			d13C RAW **	1SE		** adjusted for FC baseline
UW6220_7nA@2.asc			09.03.2023	13:52:00	6.91691	-1575	800	4.4856e+07	0.175073	480744	0.173477	312.466	1.91465			-45.5559	0.550506
UW6220_7nA@3.asc			09.03.2023	13:55:00	6.90296	-1617	842	4.22283e+07	4.50626	452746	4.60046	463.229	48.8419		-45.7441		1.76441
UW6220_7nA@4.asc			09.03.2023	13:58:00	6.89661	-1652	903	4.4025e+07	0.244474	472399	0.252452	164.961	1.83257			-45.6256	0.502226
UW6220_7nA@5.asc			09.03.2023	14:00:00	6.8952	-1744	866	1.17707e+08	0.589448	1.24194e+06	0.581179	99721.2	0.315559		-61.1034		0.151776
UW6220_7nA@6.asc			09.03.2023	14:03:00	6.88366	-1815	900	1.74253e+08	0.471176	1.83039e+06	0.464158	172334	0.575616		-65.4071		0.11839
UW6220_7nA@7.asc			09.03.2023	14:06:00	6.87404	-1990	648	4.71554e+07	0.372015	504302	0.379459	964.297	7.57012		-47.7246		0.322565							Values for calibration
UW6220_7nA@8.asc			09.03.2023	14:13:00	6.85491	-1912	866	4.30995e+07	0.264512	462262	0.288161	175.385	0.641303			-45.8204	0.496677							d13C	1SE	N
UW6220_7nA@9.asc			09.03.2023	14:18:00	6.84588	-1351	1421	4.2066e+07	0.290662	451265	0.274561	356.594	2.83277			-45.9954	0.409565
UW6220_7nA@10.asc			09.03.2023	14:21:00	6.84988	-1200	1414	4.18532e+07	0.217804	448506	0.215062	154.545	1.11891			-45.3084	0.343812
UW6220_7nA@11.asc			09.03.2023	14:25:00	6.83198	-1193	1506	4.22034e+07	0.240058	452536	0.242149	225.407	1.24088			-45.7663	0.368805	UW6220
UW6220_7nA@12.asc			09.03.2023	14:28:00	6.83651	-1248	1594	4.20355e+07	0.255383	451069	0.240618	210.514	1.53782			-45.7305	0.350303	-45.7001	0.2863					-45.6614	0.0779956	8
UWAnk10_7nA@1.asc			09.03.2023	14:32:00	6.82359	-3103	84	4.31066e+07	0.301266	460972	0.309956	170.768	1.39254			-48.7806	0.32678
UWAnk10_7nA@2.asc			09.03.2023	14:35:00	6.82087	-3010	135	4.34252e+07	0.310542	463515	0.317863	185.419	1.09133			-49.1401	0.360874
UWAnk10_7nA@3.asc			09.03.2023	14:39:00	6.81802	-3639	742	4.29097e+07	0.279626	458734	0.288388	175.311	1.38084			-48.6779	0.279467
UWAnk10_7nA@4.asc			09.03.2023	14:42:00	6.80934	-3960	-268	4.34134e+07	0.293322	463914	0.287928	180.768	1.79991			-48.9359	0.420138	UWAnk10
UWAnk10_7nA@5.asc			09.03.2023	14:46:00	6.80097	-4833	-717	4.31779e+07	0.298219	461592	0.300388	179.572	2.20425			-49.1306	0.278541	-48.933	0.206307					-48.933	0.0922631	5
UWAnk7_7nA@1.asc			09.03.2023	14:50:00	6.79616	246	-4021	4.74875e+07	0.381405	503307	0.382111	260.193	1.46878			-56.7964	0.303427
UWAnk7_7nA@2.asc			09.03.2023	14:53:00	6.79019	1527	-4473	4.74764e+07	0.389421	503231	0.379627	257.101	1.63323			-56.5186	0.278974
UWAnk7_7nA@3.asc			09.03.2023	14:57:00	6.79147	1106	-3731	4.76125e+07	0.396812	504193	0.401677	244.117	0.994245			-56.4948	0.36779
UWAnk7_7nA@4.asc			09.03.2023	15:01:00	6.83322	310	-2638	4.74854e+07	0.368839	502991	0.355051	254.184	0.981945			-56.9352	0.350323	UWAnk7
UWAnk7_7nA@5.asc			09.03.2023	15:05:00	6.80091	636	-4310	4.67411e+07	0.377083	495005	0.361775	229.977	1.11443			-57.3411	0.453264	-56.8172	0.347119					-56.8172	0.155236	5
UWAnk1_7nA@1.asc			09.03.2023	15:09:00	6.79489	2096	-2824	5.595e+07	0.497814	594473	0.507413	540.718	1.35168			-54.4042	0.280923
UWAnk1_7nA@2.asc			09.03.2023	15:12:00	6.79006	2828	-2518	5.45575e+07	0.508005	579804	0.501659	432.673	0.62125			-54.7579	0.340193
UWAnk1_7nA@3.asc			09.03.2023	15:15:00	6.78135	2971	-3345	5.5189e+07	0.455891	586320	0.44662	1029.03	3.21776			-54.8594	0.321905
UWAnk1_7nA@4.asc			09.03.2023	15:18:00	6.7818	2877	-3406	5.4454e+07	0.513317	578064	0.499173	409.756	0.499655			-55.0201	0.31127	UWAnk1
UWAnk1_7nA@5.asc			09.03.2023	15:22:00	6.77003	3330	-1814	5.46714e+07	0.454733	580416	0.449932	487.65	0.71599			-55.1004	0.283645	-54.7604	0.260809					-54.7604	0.121771	5
UW6220_7nA@13.asc			09.03.2023	15:26:00	6.76422	-1494	1471	4.20663e+07	0.265818	450715	0.255065	1154.11	2.59502		-46.5494		0.303701
UW6220_7nA@14.asc			09.03.2023	15:29:00	6.76884	-1361	1640	4.16191e+07	0.24301	445941	0.241723	269.333	2.05093			-45.66	0.149554
UW6220_7nA@15.asc			09.03.2023	15:33:00	6.76389	-1301	1640	4.18661e+07	0.240042	448920	0.238044	400.051	1.79855			-45.7034	0.238942
UW6220_7nA@16.asc			09.03.2023	15:36:00	6.76469	-1321	1560	4.16003e+07	0.261099	446335	0.257226	170.244	0.836043			-45.3794	0.29962	UW6220
UW6220_7nA@17.asc			09.03.2023	15:39:00	6.75577	-1392	1560	4.13868e+07	0.267903	443672	0.258296	146.802	1.17724			-45.748	0.471761	-45.6227	0.166105	-45.6614	0.220605
UW6220_7nA@18.asc			09.03.2023	15:53:00	6.75439	-5099	-3784	3.71415e+07	0.267118	397432	0.262865	176.346	5.03835		Mount change	-46.1257	0.478903
UW6220_7nA@19.asc			09.03.2023	15:57:00	6.75228	-4892	-3727	3.70422e+07	0.276992	397077	0.282267	134.195	4.41881			-46.0015	0.382759		0.84
UW6220_7nA@20.asc			09.03.2023	16:00:00	6.75159	-4774	-3709	3.76634e+07	0.312218	404313	0.31558	119.463	3.01474			-45.8425	0.341647	UW6220						d13C VPDB	2SD		overall bias	bias (fit, rel UW6220)	Fe#
UW6220_7nA@21.asc			09.03.2023	16:04:00	6.74721	-5261	-3384	3.74849e+07	0.311843	402130	0.303598	169.384	4.74813			-46.0683	0.283766	-46.0095	0.122361	-45.7774	0.253821
Ne5b1_C_dol@1.asc	Ne-5b-1 Area 7 #113	Dol # 12	09.03.2023	16:09:00	6.74344	-2584	-679	4.25729e+07	0.516365	453210	0.512504	220.635	2.98593			-53.1971	0.369662							-4.16096	0.625129		-49.241	-2.49759	0.17		C1	31.215
Ne5b1_C_dol@2.asc	Ne-5b-1 Area 7 #112	Dol # 13	09.03.2023	16:12:00	6.74365	-2255	-875	4.24872e+07	0.450432	451592	0.434091	252.37	3.33448			-53.609	0.386947							-4.33869	0.625129		-49.485	-2.75352	0.21		C2	-18.26
Ne5b1_C_dol@3.asc	Ne-5b-1 Area 7 #115	Dol # 14	09.03.2023	16:16:00	6.74267	-2938	-1012	4.23115e+07	0.524703	449438	0.523968	219.385	3.48463			-54.1911	0.278151							-5.13325	0.625129		-49.3109	-2.57093	0.18		C3	-0.2955
Ne5b1_C_dol@4.asc	Ne-5b-1 Area 7 #111		09.03.2023	16:20:00	6.74044	-2198	-1080	4.27092e+07	0.533385	454518	0.519035	187.583	2.92205			-53.979	0.354139							-4.78255	0.625129		-49.4329	-2.6989	0.2
Ne5b1_C_dol@5.asc	Ne-5b-1 Area 7 #114		09.03.2023	16:24:00	6.73263	-3311	-1396	4.21832e+07	0.409289	448282	0.411537	201.992	3.41145			-53.7178	0.360217							-4.63545	0.625129		-49.3109	-2.57093	0.18
Ne5b1_C_dol@6.asc	Ne-5b-1 Area 3/4 #40		09.03.2023	16:29:00	6.7367	-1509	-2388	4.26692e+07	0.479315	453398	0.464558	303.151	3.12715			-53.8526	0.249383							-4.64949	0.625129		-49.4329	-2.6989	0.2
Ne5b1_C_dol@7.asc	Ne-5b-1 Area 3/4 #41 / #68 (in between)		09.03.2023	16:32:00	6.73878	-1485	-2573	4.32007e+07	0.490434	459710	0.472561	293.42	2.52775			-53.2434	0.447681							-4.00863	0.625129		-49.4329	-2.6989	0.2
Ne5b1_C_dol@8.asc	Ne-5b-1 Area 4 #62	Dol # 15	09.03.2023	16:36:00	6.7352	-1852	-2552	4.29879e+07	0.409138	457548	0.413723	318.232	3.24043			-52.7493	0.322313							-3.61672	0.625129		-49.3109	-2.57093	0.18
Ne5b1_C_dol@9.asc	Ne-5b-1 Area 4 #63		09.03.2023	16:40:00	6.74218	-1892	-2428	4.30399e+07	0.384749	457671	0.377761	280.005	3.12666			-53.5313	0.347463							-4.37229	0.625129		-49.3749	-2.63804	0.19
Ne5b1_C_dol@10.asc	Ne-5b-1 Area 8 #117	Dol # 4	09.03.2023	16:45:00	6.7336	1562	-3311	4.27119e+07	0.511041	454951	0.519978	203.444	3.30602			-53.1647	0.481313							-3.98661	0.625129		-49.3749	-2.63804	0.19
Ne5b1_C_dol@11.asc	Ne-5b-1 Area 8 #123	Dol # 1	09.03.2023	16:48:00	6.73681	1776	-3157	4.25072e+07	0.456553	452019	0.458745	189.895	2.81593			-53.9015	0.290492							-4.70094	0.625129		-49.4329	-2.6989	0.2
Ne5b1_C_dol@12.asc	Ne-5b-1 Area 8 #121	Dol # 2	09.03.2023	16:52:00	6.73895	1648	-2742	4.19308e+07	0.429722	446363	0.436922	207.61	3.27049			-53.7809	0.292664							-4.63488	0.625129		-49.3749	-2.63804	0.19
Ne5b1_C_dol@13.asc	Ne-5b-1 Area 8 #125	Dol # 3	09.03.2023	16:55:00	6.73371	1138	-3062	4.34795e+07	0.306258	462842	0.310166	301.848	9.21587			-53.0042	0.326654							-3.75706	0.625129		-49.4329	-2.6989	0.2
Ne5b1_C_dol@14.asc	Ne-5b-1 Area 8 #127	Dol # 5	09.03.2023	16:59:00	6.73371	1344	-3812	4.32386e+07	0.414007	460140	0.409101	199.116	3.00748			-53.5097	0.352083							-4.28876	0.625129		-49.4329	-2.6989	0.2
Ne5b1_C_dol@15.asc	Ne-5b-1 Area 8 #126		09.03.2023	17:02:00	6.73293	1859	-3696	4.32716e+07	0.481691	460087	0.480108	170.593	2.30283			-53.8687	0.365619							-4.66649	0.625129		-49.4329	-2.6989	0.2
UW6220_7nA@22.asc			09.03.2023	17:07:00	6.72511	-5186	-3874	3.7366e+07	0.317071	400453	0.329666	141.292	3.60804			-46.5242	0.425959				0.84	True UWUW6220 VPDB
UW6220_7nA@23.asc			09.03.2023	17:10:00	6.72686	-5311	-3900	3.71151e+07	0.247315	397454	0.245813	160.848	3.12849			-46.4096	0.401268				-46.8605	Bias UW6220
UW6220_7nA@24.asc			09.03.2023	17:14:00	6.72173	-4703	-3429	3.75225e+07	0.235074	402370	0.24261	139.437	4.04896			-45.5264	0.333307	UW6220
UW6220_7nA@25.asc			09.03.2023	17:18:00	6.72245	-4624	-3503	3.71662e+07	0.262462	397950	0.263729	109.786	2.82046			-45.9805	0.452694	-46.1102	0.454122	-46.0598	0.312564
Mgs1_7nA@1.asc			09.03.2023	17:23:00	6.70974	-4888	-160	2.3218e+07	0.113786	247581	0.125584	113.307	4.07868			-50.746	0.551822
Mgs1_7nA@2.asc			09.03.2023	17:26:00	6.72085	-4952	-78	2.31693e+07	0.145342	246470	0.149308	102.837	3.08049			-52.3034	0.582054
Mgs1_7nA@3.asc			09.03.2023	17:29:00	6.71511	-4996	-8	2.31474e+07	0.123203	247316	0.139537	90.7532	2.87646			-51.6762	0.675352
Mgs1_7nA@4.asc			09.03.2023	17:33:00	6.71216	-5044	38	2.33441e+07	0.149135	248622	0.147411	87.4602	2.10512			-51.8126	0.480509
Mgs1_7nA@5.asc			09.03.2023	17:36:00	6.71015	-5016	-126	2.30638e+07	0.181624	245685	0.193272	82.3526	1.75908			-51.5392	0.719216	-51.6155	0.565164
Ne5b1_C_mgs@1.asc	Ne-5b-1 Area 7 -> no SEM, upper right of view		09.03.2023	17:41:00	6.70476	-2035	-767	3.26647e+07	0.171075	345213	0.164312	144.571	2.18975			-59.0672	0.49444							-4.81958	1.2645		-54.5103	-4.30251	0.31		C1	11.99
Ne5b1_C_mgs@2.asc	Ne-5b-1 Area 7 -> no SEM, upper right of view		09.03.2023	17:45:00	6.69729	-1589	-742	3.2706e+07	0.171362	345946	0.169355	145.364	2.27195			-60.2846	0.362305							-6.10717	1.2645		-54.5103	-4.30251	0.31		C2	-17.725
Ne5b1_C_mgs@3.asc	Ne-5b-1 Area 7 -> no SEM, upper right of view		09.03.2023	17:48:00	6.70264	-1333	-1105	3.28192e+07	0.191448	346806	0.183206	133.254	1.96984			-59.3879	0.380556							-5.15877	1.2645		-54.5103	-4.30251	0.31		C3	0.04
Ne5b1_C_mgs@4.asc	Ne-5b-1 Area 7 -> no SEM, upper right of view		09.03.2023	17:52:00	6.6931	-802	-943	3.30904e+07	0.206745	349779	0.210317	157.878	2.69438			-59.0424	0.504768							-4.79331	1.2645		-54.5103	-4.30251	0.31
Ne5b1_C_mgs@5.asc	Ne-5b-1 Area 8 #133	Mgs-Sd # 17	09.03.2023	17:56:00	6.69117	790	-3381	3.27782e+07	0.195865	346224	0.201938	164.047	2.48249			-58.8741	0.650712							-4.51361	1.2645		-54.6069	-4.40422	0.32
Ne5b1_C_mgs@6.asc	Ne-5b-1 Area 8 #130	Mgs-Sd # 14	09.03.2023	18:00:00	6.69932	970	-3399	3.28044e+07	0.197339	347100	0.198149	126.466	1.79852			-58.6888	0.423155							-4.41933	1.2645		-54.5103	-4.30251	0.31
Ne5b1_C_mgs@7.asc	Ne-5b-1 Area 8 #128	Mgs-Sd # 15	09.03.2023	18:04:00	6.69532	988	-3514	3.23685e+07	0.167952	342501	0.177111	120.512	2.30217			-59.2847	0.367789							-5.04956	1.2645		-54.5103	-4.30251	0.31
Ne5b1_C_mgs@8.asc	Ne-5b-1 Area 8 #129	Mgs-Sd # 16	09.03.2023	18:07:00	6.69489	869	-3582	3.2325e+07	0.177877	341510	0.167704	168.456	2.31834			-59.8612	0.520928							-5.55773	1.2645		-54.6069	-4.40422	0.32
Ne5b1_C_mgs@9.asc	Ne-5b-1 Area #132		09.03.2023	18:11:00	6.68315	746	-3146	3.23576e+07	0.191362	341711	0.181309	713.716	2.06328			-59.4464	0.345752							-5.22063	1.2645		-54.5103	-4.30251	0.31
Ne5b1_C_mgs@10.asc	Ne-5b-1 Area 8 #134 (ca.)		09.03.2023	18:15:00	6.6794	1264	-3234	3.19115e+07	0.127787	338009	0.152304	107.434	1.10477			-59.2425	0.46413							-5.10901	1.2645		-54.4115	-4.1984	0.3
Ne5b1_C_mgs@11.asc	Ne-5b-1 Area 6 #96 / #98 (in between)	Mgs-Sd # 26 / #27 (inbetween)	09.03.2023	18:22:00	6.67549	-2027	-4694	3.21334e+07	0.175954	338928	0.181234	976.151	2.71392			-61.8846	0.275699							-5.97907	1.2645		-56.2418	-6.12594	0.56
Ne5b1_C_mgs@12.asc	Ne-5b-1 Area 6 #100 (close by) (excl.)		09.03.2023	18:27:00	6.67632	-2077	-4476	3.18567e+07	0.191677	337475	0.170263	265.609	3.37224			-59.9599	0.467586					Mixture	-5.37172		1.2645		-54.883	-4.69498	0.35
Ne5b1_C_mgs@13.asc	Ne-5b-1 Area 6 #100 (2nd close by)		09.03.2023	18:31:00	6.6729	-2074	-4526	3.25686e+07	0.181821	344549	0.189538	141.493	2.5823			-59.4201	0.411591							-5.19281	1.2645		-54.5103	-4.30251	0.31
Ne5b1_C_mgs@14.asc	Ne-5b-1 Area 6 right of #100 in Mgs		09.03.2023	18:34:00	6.67885	-1966	-4463	3.27441e+07	0.1765	346263	0.188011	146.776	2.49693			-59.3373	0.472067							-5.10521	1.2645		-54.5103	-4.30251	0.31
Ne5b1_C_mgs@15.asc	Ne-5b-1 Area 6 right of / below #96/#104 in Mgs		09.03.2023	18:37:00	6.67639	-1971	-4767	3.25724e+07	0.171481	344372	0.174821	135.794	1.74601			-58.8212	0.444402	-59.5068	0.788835					-4.35838	1.2645		-54.7012	-4.50354	0.33
Mgs1_7nA@6.asc			09.03.2023	18:43:00	6.67326	-5108	-94	2.23336e+07	0.128942	237316	0.131609	79.7047	2.64996		-52.5541		0.573026
Mgs1_7nA@7.asc			09.03.2023	18:46:00	6.67694	-5166	-1	2.27135e+07	0.104829	242095	0.10886	81.9762	2.66275			-50.7199	0.478695				-0.82	True UWMgs1 VPDB
Mgs1_7nA@8.asc			09.03.2023	18:49:00	6.68281	-5172	66	2.25805e+07	0.118413	240994	0.158549	71.3982	1.77738			-50.7152	0.747395				-50.4248	Bias UWMgs1
Mgs1_7nA@9.asc			09.03.2023	18:52:00	6.68227	-5253	73	2.24411e+07	0.0920923	239078	0.120018	70.2154	1.70437			-50.5999	0.710632
Mgs1_7nA@10.asc			09.03.2023	19:00:00	6.66725	-5101	123	2.29061e+07	0.0748467	243877	0.0846096	66.1696	1.33185			-50.7187	0.631676	-50.6884	0.0590583	-51.2034	0.632251			Values for calibration
Calib_Mgs1_7nA@1.asc			09.03.2023	19:25:00	6.66116	638	-1474	2.39462e+07	0.249424	254549	0.262973	141.534	4.48868		Mount change	-53.2351	0.700464							d13C	1SE	N
Calib_Mgs1_7nA@2.asc			09.03.2023	19:29:00	6.66706	1324	-1862	2.36847e+07	0.233214	251855	0.252345	133.751	3.67558			-52.6193	0.575787
Calib_Mgs1_7nA@3.asc			09.03.2023	19:32:00	6.66494	2180	-2574	2.34051e+07	0.238207	248792	0.24308	136.292	4.30792			-52.7168	0.608066	UWMgs1
Calib_Mgs1_7nA@4.asc			09.03.2023	19:35:00	6.66672	2111	-2417	2.34987e+07	0.245989	250164	0.258208	109.194	4.04981			-52.4204	0.633441	-52.729	0.347424					-52.729	0.105988	10
Calib_Mgs7_7nA@1.asc			09.03.2023	19:41:00	6.66944	-779	1965	3.31107e+07	0.230306	351369	0.238254	1027.74	1.44641			-54.6272	0.491561
Mgs7_7nA@2.asc			09.03.2023	19:46:00	6.66242	-1030	1705	3.30451e+07	0.256231	351125	0.247177	146.453	2.50346			-54.4296	0.443396
Mgs7_7nA@3.asc			09.03.2023	19:49:00	6.66426	-1686	1966	3.40054e+07	0.305009	360727	0.311153	1428.47	2.3397		-55.5782		0.336244
Mgs7_7nA@4.asc			09.03.2023	19:52:00	6.66043	-299	2983	3.50008e+07	0.354933	370752	0.339629	4923.27	1.54076		-57.5065		0.389166
Mgs7_7nA@5.asc			09.03.2023	19:56:00	6.65919	526	3207	4.29278e+07	0.691294	451617	0.676823	13686.7	2.28351		-63.2082		0.372307
Mgs7_7nA@6.asc			09.03.2023	20:03:00	6.64603	860	3039	3.21813e+07	0.233566	341893	0.225304	107.877	1.8597			-54.5999	0.295547
Mgs7_7nA@7.asc			09.03.2023	20:07:00	6.64474	334	2227	3.29017e+07	0.290075	349562	0.286966	112.608	1.01083			-54.4775	0.466685	UWMgs7						-54.6024	0.0781149	5
Mgs7_7nA@8.asc			09.03.2023	20:12:00	6.6417	-394	1971	3.33624e+07	0.244986	353964	0.238603	120.633	2.011			-54.878	0.357382	-54.6024	0.17467
Sd2_7nA@1.asc			09.03.2023	20:18:00	6.63385	-2350	-2705	3.36169e+07	0.314399	354866	0.301027	165.244	2.19036			-61.533	0.540207
Sd2_7nA@2.asc			09.03.2023	20:21:00	6.64922	-2485	-3349	3.39028e+07	0.345804	357728	0.333385	139.41	1.76549			-61.6874	0.449955
Sd2_7nA@3.asc			09.03.2023	20:24:00	6.64922	-2703	-4266	3.39693e+07	0.341415	358770	0.340748	136.345	1.41425			-61.3728	0.392886
Sd2_7nA@4.asc			09.03.2023	20:27:00	6.64502	-3546	-4656	3.4502e+07	0.347434	364518	0.340393	132.851	1.31149			-60.6288	0.449874	UWSd2						-61.4402	0.226164	5
Sd2_7nA@5.asc			09.03.2023	20:30:00	6.64237	-2536	-3287	3.3699e+07	0.374125	355492	0.371937	120.162	1.1561			-61.9791	0.450309	-61.4402	0.505719
Calib_Mgs1_7nA@5.asc			09.03.2023	20:35:00	6.63193	421	-1863	2.41499e+07	0.555418	256302	0.578378	112.366	4.35232			-53.1365	0.654533
Calib_Mgs1_7nA@6.asc			09.03.2023	20:38:00	6.63341	398	-1931	2.5143e+07	0.277441	267655	0.275765	87.4467	2.87918			-52.3781	0.775108	-52.7573	0.536261
Sd3_7nA@1.asc			09.03.2023	20:43:00	6.62592	-3363	-1087	3.23359e+07	0.338861	340651	0.317924	140.405	1.97755			-63.1047	0.495257
Sd3_7nA@2.asc			09.03.2023	20:46:00	6.63005	-3841	-1164	3.25889e+07	0.299967	343843	0.292503	139.141	1.36068			-63.0724	0.510751
Sd3_7nA@3.asc			09.03.2023	20:49:00	6.62711	-4404	-1546	3.30923e+07	0.351326	348680	0.348906	137.179	1.50383			-62.9471	0.355015		-5.06
Sd3_7nA@4.asc			09.03.2023	20:53:00	6.62786	-4458	-1153	3.31549e+07	0.307981	348549	0.293588	136.587	1.30492			-62.5347	0.413522	UWSd3	-58.0198					-62.7862	0.163815	5
Sd3_7nA@5.asc			09.03.2023	20:56:00	6.62469	-3317	-1626	3.26227e+07	0.344736	343376	0.348443	130.404	1.17448			-62.2722	0.292857	-62.7862	0.3663
Calib_Mgs1_7nA@7.asc			09.03.2023	21:01:00	6.61505	1015	-2221	2.36045e+07	0.23363	251248	0.255387	104.248	3.94598			-52.9823	0.674175
Calib_Mgs1_7nA@8.asc			09.03.2023	21:04:00	6.61633	1206	-2257	2.36909e+07	0.235611	251824	0.223515	92.971	2.84886			-52.2325	0.645655
Calib_Mgs1_7nA@9.asc			09.03.2023	21:07:00	6.61586	2028	-2662	2.3171e+07	0.220615	247214	0.251007	108.563	3.73737			-52.6406	0.737851
Calib_Mgs1_7nA@10.asc			09.03.2023	21:11:00	6.61494	2887	-3140	2.32117e+07	0.233652	247196	0.228098	114.705	3.92254			-52.9286	0.723415	-52.696	0.343478	-52.7164	0.359587

## Sheet: d18O Dol-Ank Calib
RM	Fe#	True d18O VSMOW	RAW d18O	2SE	bias	bias(RM-UW6220)	bias(RM-UW6220) from fit	Residual
UW6220	0.004	22.6	13.7466	0.0829539	-8.65769	0	0.310136	0.317047
UWAnk10	0.019	19.55	12.093	0.221578	-7.31403	1.35539	1.25896	-0.0981953
UWAnk4	0.179	9.22	5.9303	0.214354	-3.23002	5.47507	5.41754	-0.0577489
UWAnk7	0.179	11.38	7.82701	0.145265	-3.51301	5.18961	5.41754	0.229285
UWAnk1	0.522	15.87	14.504	0.0599982	-1.34466	7.3769	7.45446	0.0782171
UWAnk5cl	0.766	17.11	16.5679	0.12119	-0.532982	8.19566	7.96446	-0.233298
UWAnk6a	0.789	15.99	14.9873	0.0812902	-0.986916	7.73776	7.99881	0.26312
Ref to WiscSIMS RMs:							Hill fit parameters
Śliwiński, M.G. et al. (2016) ‘Secondary Ion Mass Spectrometry Bias on Isotope Ratios in Dolomite-Ankerite, Part I: δ18O Matrix Effects’, Geostandards and Geoanalytical Research, 40(2), pp. 157–172. Available at: https://doi.org/10.1111/j.1751-908X.2015.00364.x.							bias max	9.39
							k	0.13
							n	0.97
											bias(RM-UW6220)		Range of unknowns
										Fe#	Hill fit		Fe#	bias(RM-UW6220)
										0	0		0.2	5.6619
										0.05	2.66268		0.28	6.36569
										0.1	4.10078
										0.15	5.02033
										0.2	5.6619
										0.25	6.13604
										0.3	6.50123
										0.35	6.7914
										0.4	7.02768
										0.45	7.22389
										0.5	7.3895
										0.55	7.53118
										0.6	7.65381
										0.65	7.76101
										0.7	7.85554
										0.75	7.93953
										0.8	8.01465

## Sheet: d18O Mgs-Sid Calib
RM	Fe#	True d18O VSMOW	RAW d18O	2SE	bias	bias(RM-UWMgs1)	bias(RM-UWMgs1) from Hill-type fit	Residual
UWMgs1	0.002	12.28	-4.93227	0.102071	-17.0035	0	0.23336	0.23336
UWMgs4	0.104	12.62	4.85999	0.089088	-7.6633	9.50173	9.17868	-0.323051
UWMgs7	0.295	16.61	9.78493	0.603007	-6.71356	10.4679	10.5533	0.0854307
UWSd3	0.645	15.3	6.37992	0.0418224	-8.78566	8.35995	8.65854	0.298589
UWSd2	0.53	15.88	7.6684	0.173737	-8.08324	9.07453	8.64484	-0.429694
UWSd1	0.997	7.92	3.95713	0.0630198	-3.93173	13.2978	13.2821	-0.0157531
linear model (used)			Hill-type model						bias(RM-Mgs1)	Range of unknowns	bias(RM-UWMgs1)
m	-6.00889		C1	2.24				Fe#	Hill-type fit	Fe#	Linear model (used)
n	12.2452		C2	9.07				0	0	0.3	10.4425
			C3	0				0.02	2.25767	0.64	8.39946
			n	1.99				0.04	4.35344
			k	0.2				0.06	6.20402
			d	3.07				0.08	7.75032
								0.1	8.97246
Ref to WiscSIMS RMs:								0.12	9.88343
Śliwiński, M.G. et al. (2018) ‘SIMS Bias on Isotope Ratios in Ca‐Mg‐Fe Carbonates (Part III): δ18O and δ13C Matrix Effects Along the Magnesite–Siderite Solid‐Solution Series’, Geostandards and Geoanalytical Research, 42(1), pp. 49–76. Available at: https://doi.org/10.1111/ggr.12194.								0.14	10.5176
								0.16	10.9197
								0.18	11.1358
								0.2	11.2088
								0.22	11.1757
								0.24	11.0666
								0.26	10.9057
								0.28	10.7118
								0.3	10.499
								0.32	10.2783
								0.34	10.0575
								0.36	9.84271
								0.38	9.63823
								0.4	9.44723
								0.42	9.27203
								0.44	9.11427
								0.46	8.97513
								0.48	8.85546
								0.5	8.75582
								0.52	8.67665
								0.54	8.61823
								0.56	8.58077
								0.58	8.56443
								0.6	8.56933
								0.62	8.59557
								0.64	8.64326
								0.66	8.7125
								0.68	8.8034
								0.7	8.9161
								0.72	9.05072
								0.74	9.20742
								0.76	9.38637
								0.78	9.58776
								0.8	9.8118
								0.82	10.0587
								0.84	10.3287
								0.86	10.622
								0.88	10.939
								0.9	11.2799
								0.92	11.645
								0.94	12.0345
								0.96	12.4489
								0.98	12.8885
								1	13.3535

## Sheet: d13C Calib
Dolomite-Ankerite
RM	Fe#	True d13C VPDB	RAW d13C	2SE	bias	bias(RM-UW6220)	bias(RM-UW6220) from fit	Residual
UW6220	0.004	0.84	-45.6614	0.155991	-46.4624	0	-0.368041	-0.368041
UWAnk10	0.019	-1.52	-48.933	0.184526	-47.4852	-1.07265	-0.631171	0.441477
UWAnk7	0.179	-8.36	-56.8172	0.310473	-48.8657	-2.52042	-2.56388	-0.0434553
UWAnk1	0.522	-7.38	-54.7604	0.243542	-47.7327	-1.33217	-1.32163	0.0105423
						C1	31.215
						C2	-18.26
						C3	-0.2955
						Ref to WiscSIMS RMs:
						Śliwiński, M.G. et al. (2016) ‘Secondary Ion Mass Spectrometry Bias on Isotope Ratios in Dolomite-Ankerite, Part II: δ13C Matrix Effects’, Geostandards and Geoanalytical Research, 40(2), pp. 173–184. Available at: https://doi.org/10.1111/j.1751-908X.2015.00380.x.
Magnesite-Siderite
RM	Fe#	True d13C VPDB	RAW d13C	2SE	bias	bias(RM-UWMgs1)
UWMgs1	0.002	-0.82	-52.729	0.211975	-51.9516	0
UWMgs7	0.295	1.35	-54.6024	0.15623	-55.877	-4.14047
UWSd2	0.53	-4.03	-61.4402	0.452329	-57.6425	-6.00275
UWSd3	0.645	-5.06	-62.7862	0.327629	-58.0198	-6.4007
						C1	11.99
						C2	-17.725
						C3	0.04
						Ref to WiscSIMS RMs:
						Śliwiński, M.G. et al. (2018) ‘SIMS Bias on Isotope Ratios in Ca‐Mg‐Fe Carbonates (Part III): δ18O and δ13C Matrix Effects Along the Magnesite–Siderite Solid‐Solution Series’, Geostandards and Geoanalytical Research, 42(1), pp. 49–76. Available at: https://doi.org/10.1111/ggr.12194.
